# Supplementary material for: Discovering new DNA gyrase inhibitors using machine learning approaches
Source: Royal Society of Chemistry journal article supplement (doi:10.1039/c5ra22568j), 2015-01-01
Supplement: c5ra22568j2.xlsx [file c5ra22568j2.xlsx]

## Sheet: 137 origin data
name	SMILES	classification	IC50_nM
Compound1	S1\C(=C/c2cc([N+](=O)[O-])ccc2[O-])\C(=O)N(CCC(=O)[O-])C1=S	0	1000000
Compound2	O1[C@H](Oc2cc3OC(=O)C(NC(=O)c4cc(C\C=C(\C)/C)c(O)cc4)=C([O-])c3cc2)[C@H](O)[C@H](OC(=O)N)[C@@H](O)C1(C)C	1	3
Compound3	S1C[C@H](NC(=O)[C@@H](NC(=O)[C@H]2N(CC[C@@H]2O)C(=O)[C@@H]([NH3+])C)COC(=O)c2c(C1)c(O)cc(O)c2C)C(=O)N[C@H](C(=O)[O-])C	1	1.5
Compound4	Brc1c(C(OC)=O)c(CSC[C@H](Nc2scc(n2)-c2ccc([N+](=O)[O-])cc2)c2onc(n2)C)c([O-])cc1OC	1	160
Compound5	Brc1c(C(OC)=O)c(CSC[C@H](Nc2scc(n2)-c2ccc([N+](=O)[O-])cc2)C(OC)=O)c([O-])cc1OC	1	490
Compound6	S1\C(=C/c2ccc(O)cc2O)\C(=O)N(CCC(=O)[O-])C1=S	0	204000
Compound7	Clc1cc(\C=C\2/SC(=S)N(CCC(=O)[O-])C/2=O)c(O)cc1	0	64000
Compound8	S1\C(=C/c2cc(O)c(O)cc2)\C(=O)N(CCC(=O)[O-])C1=S	0	1000000
Compound9	BrC1=CC(\C=C\2/SC(=S)N(CC(=O)[O-])C/2=O)=C(O)[C@@H](OC)C1	0	1000000
Compound10	Clc1cc(\C=C\2/SC(=O)N(Cc3cc([N+](=O)[O-])ccc3)C/2=O)c(O)cc1	0	1000000
Compound11	Clc1cc(\C=C\2/SC(=O)N(CC(=O)[O-])C/2=O)c(O)cc1	0	1000000
Compound12	S1\C(=C/c2cccc(OC)c2O)\C(=O)N(Cc2cc([N+](=O)[O-])ccc2)C1=O	0	1000000
Compound13	S1\C(=C/c2cccc(OC)c2O)\C(=O)N(c2ccc([N+](=O)[O-])cc2)C1=S	0	1000000
Compound14	S1\C(=C/c2cc(O)ccc2)\C(=O)N(c2cc(ccc2)C(=O)[O-])C1=S	0	1000000
Compound15	Clc1cc(\C=C\2/SC(=S)N(C/2=O)c2cc(ccc2)C(=O)[O-])c(O)cc1	0	1000000
Compound16	S1\C(=C/c2ccccc2O)\C(=O)N(c2cc(ccc2)C(=O)[O-])C1=S	0	1000000
Compound17	S1\C(=C/c2ccccc2O)\C(=O)N(CCC(=O)[O-])C1=O	0	1000000
Compound18	S1\C(=C/c2cccc(OC)c2O)\C(=O)N(CCC(=O)[O-])C1=S	0	680000
Compound19	Brc1cc(\C=C\2/SC(=S)N(C/2=O)c2cc(ccc2)C(=O)[O-])c(O)c(OC)c1	0	70000
Compound20	s1c(-c2n[nH]c(SC)c2)c(nc1-c1sccc1)C	1	2900
Compound21	s1c(-c2n[nH]c(c2)C(OCC)=O)c(nc1-c1sccc1)C	1	2600
Compound22	s1c(-c2n[nH]c(c2)CC)c(nc1-c1sccc1)C	1	4800
Compound23	s1c(-c2n[nH]c(SC)c2)c(nc1-c1ccccc1)C	1	3500
Compound24	s1c(-c2n[nH]c(c2)C(OCC)=O)c(nc1-c1ccccc1)C	1	1700
Compound25	s1c(-c2n[nH]c(c2)C(OCC)=O)c(nc1-c1ccccc1)CCC	1	800
Compound26	s1c(c(nc1-c1ccccc1)-c1ccccc1)-c1n[nH]c(c1)C(OCC)=O	1	140
Compound27	s1c(-c2n[nH]c(c2)C(OCC)=O)c([nH+]c1-c1ccccc1)N1CCCCC1	1	210
Compound28	s1c(c(nc1-c1cccnc1)-c1ccccc1)-c1n[nH]c(c1)C(=O)NCC	1	45
Compound29	s1c(-c2n[nH]c(c2)C(=O)NCC)c(nc1-c1cccnc1)C	1	350
Compound30	s1c(-c2n[nH]c(c2)C(=O)NCC)c([nH+]c1-c1cccnc1)N1CCCCC1	1	90
Compound31	s1c(-c2n[nH]c(c2)C(=O)NCC)c(nc1-c1cccnc1)[C@@H]1C[C@@H]([NH2+]CC1)C	1	40
Compound32	s1c(-c2n[nH]c(c2)C(=O)NCC)c(nc1-c1cccnc1)[C@H]1C[C@H]([NH2+]CC1)C	1	3400
Compound33	s1c(-c2n[nH]c(c2)C(=O)NCC)c(nc1-c1cccnc1)[C@@H]1C[C@@H]([NH2+]C1)C	1	82
Compound34	s1c(c(nc1-c1cccnc1)C1CCCCC1)-c1n[nH]c(c1)C(=O)NCC	1	62
Compound35	Clc1ccc(cc1)-c1nc(sc1-c1n[nH]c(c1)C(=O)NCC)-c1cccnc1	1	47
Compound36	s1c(-c2n[nH]c(c2)C(OC)=O)c([nH+]c1-c1cccnc1)N1CCCCC1	1	56
Compound37	s1c(-c2n[nH]c(c2)C(OCC#C)=O)c([nH+]c1-c1cccnc1)N1CCCCC1	1	11
Compound38	s1cc(nc1Nc1ccc(cc1)C(=O)[O-])-c1ccc(O)cc1O	0	56000
Compound39	s1cc(nc1Nc1cc(O)c(cc1)C(=O)[O-])-c1ccc(O)cc1O	0	39000
Compound40	s1cc(nc1Nc1cc(C(=O)[O-])c(O)cc1)-c1ccc(O)cc1O	0	36000
Compound41	s1cc(nc1Nc1ccc(S(=O)([O-])=[NH])cc1)-c1ccc(O)cc1O	0	25000
Compound42	s1cc(nc1Nc1ccc(S(=O)(=O)Nc2noc(c2)C)cc1)-c1ccc(O)cc1O	0	46000
Compound43	s1c(nnc1-c1ccccc1)-c1c(n[nH]c1CCC(O)=C)-c1cc(CC)c(O)cc1O	0	500000
Compound44	s1cc(nc1NS(=O)(=O)c1ccc(cc1)C(OCC)=O)-c1ccc(OC)cc1O	0	500000
Compound45	O(c1c(n[nH]c1C)-c1ccc([O-])cc1O)c1ccc(cc1)C(=O)[O-]	0	500000
Compound46	Oc1cc([O-])ccc1-c1n[nH]c(CCC(=O)[O-])c1-c1[nH]c2c(n1)cccc2	0	500000
Compound47	O1c2cc(ccc2OC1)-c1c(n[nH]c1C(=O)[O-])-c1cc(CC)c(O)cc1O	0	500000
Compound48	o1nc(N)c(n1)-n1nnc(C(=O)N\N=C\c2ccc(O)cc2O)c1CC	0	500000
Compound49	Oc1cc([O-])c(cc1)C(=O)N\N=C(\Cn1nc([N+](=O)[O-])nc1)/C	0	500000
Compound50	Brc1cc([nH]c1C)C(=O)NC1CCN(CC1)c1ncccc1[N+](=O)[O-]	1	3000
Compound51	Clc1c(Cl)c([nH]c1C(=O)NC1CCN(CC1)c1cc([nH+]c2c1cccc2)C(=O)[O-])C	1	0.9
Compound52	Clc1c(Cl)c([nH]c1C(=O)NC1CCN(CC1)c1nc(Cl)cc(c1)C(=O)N)C	1	14
Compound53	Clc1c(Cl)c([nH]c1C(=O)NC1CCN(CC1)c1sc(cn1)C(=O)[O-])C	1	25
Compound54	Fc1cc(Nc2nc(nc(n2)Nc2cc(F)ccc2)Nc2cc(C)c(cc2)C(=O)NCC[N+](C)(C)C)ccc1	1	670
Compound55	Clc1cc(Nc2nc(nc(Oc3cc(c[n+]([O-])c3)CCC(O)=C)n2)N)cc(Cl)c1	1	390
Compound56	O1[C@@H](Oc2ccc3c(OC(=O)C(NC(=O)c4cc(C\C=C(\C)/C)c(O)cc4)=C3[O-])c2C)[C@H](O)[C@H](OC(=O)N)[C@@H](OC)C1(C)C	0	28000
Compound57	Clc1c2OC(=O)C(NC(=O)c3cc(C\C=C(\C)/C)c(O)cc3)=C([O-])c2ccc1O[C@@H]1OC(C)(C)[C@H](OC)[C@@H](OC(=O)c2[nH]c(cc2)C)[C@H]1O	1	1200
Compound58	P(O)(=O)([O-])CC1=CC(Oc2c1ccc(O[C@@H]1OC(C)(C)[C@H](OC)[C@@H](OC(=O)c3[nH]c(cc3)C)[C@H]1O)c2C)=O	0	83000
Compound59	P(O)(=O)([O-])CC1=CC(Oc2c1ccc(O[C@@H]1O[C@@H](C)[C@H](OC)[C@@H](OC(=O)c3[nH]c(cc3)C)[C@H]1O)c2C)=O	0	714000
Compound60	s1c(-c2nc(sc2)Nc2ccc(cc2)C(=O)[O-])c([nH+]c1NC(=O)CC)C	1	1100
Compound61	s1c(-c2nc(sc2)Nc2ccc(S(=O)([O-])=[NH])cc2)c(nc1NC(=O)C)C	0	700000
Compound62	s1c(-c2nc(sc2)Nc2ccc(cc2)C(=O)[O-])c([nH+]c1NC(=O)c1ccccc1)C	0	1000000
Compound63	s1c(-c2nc(sc2)Nc2ccc(S(=O)([O-])=[NH])cc2)c([nH+]c1NC(=O)c1ccccc1)C	0	1000000
Compound64	s1c(cc(S(=O)([O-])=Nc2cc(F)ccc2)c1C)-c1n[nH]c(c1)C(F)(F)F	0	1000000
Compound65	s1c(cc(S(=O)(=O)NCc2ccc(OC)cc2)c1C)-c1n[nH]c(c1)C(F)(F)F	0	1000000
Compound66	S(=O)(=O)(N)c1ccc(cc1)-c1oc(cc1)\C=C(\C(=O)NCC)/C#N	0	1000000
Compound67	O1Cc2c(cc(cc2)-c2oc(cc2)\C=C(/C#N)\c2[nH]c3c(n2)cccc3)C1=O	0	1000000
Compound68	S(=O)(=O)(N)c1ccc(cc1)-c1oc(cc1)\C=C(\C(=O)N[C@@H]1CCS(=O)(=O)C1)/C#N	0	1000000
Compound69	O1CCN(CC1)c1nc(nc(n1)N\N=C\c1cccnc1)Nc1ccc(OC)cc1	0	1000000
Compound70	Fc1cc(ccc1OC)C[NH+](CC=1NC(=O)N[C@H](C)C=1C(OCC)=O)CC	0	1000000
Compound71	S1CC(=NN=C1[NH2+]C1CC1)c1cc(n(c1C)-c1ccc(S(=O)(=O)N)cc1)C	0	1000000
Compound72	s1c(-c2nc(sc2)Nc2ccc(cc2)C(=O)[O-])c(nc1NC(=O)C)C	0	5500
Compound73	s1c(-c2nc(sc2)Nc2ccc(S(=O)([O-])=[NH])cc2)c(nc1N)C	0	8200
Compound74	s1c(-c2nc(sc2)Nc2ccc(O)cc2)c(nc1NC(=O)C)C	0	30000
Compound75	s1c(-c2nc(sc2)Nc2cc(O)c(cc2)C(=O)[O-])c(nc1N)C	0	67000
Compound76	s1c(-c2nc(sc2)Nc2ccc(O)cc2)c(nc1N)C	0	125000
Compound77	s1c(-c2nc(sc2)Nc2cc(C(=O)[O-])c(O)cc2)c(nc1N)C	0	1000000
Compound78	s1c(-c2nc(sc2)Nc2cc(ccc2)C(=O)[O-])c(nc1NC(=O)C)C	0	1000000
Compound79	s1c(-c2nc(sc2)Nc2ccc(N(C)C)cc2)c(nc1NC(=O)C)C	0	1000000
Compound80	Oc1ccc(cc1)\C=C\c1cc2nc([nH]c2cc1)NC(OCC)=O	0	20000
Compound81	O=C(Nc1[nH]c2c(n1)cc(cc2)-c1cccnc1)NCC	1	81
Compound82	O=C(Nc1[nH]c2c(n1)cc(cc2)-c1ccccc1)NCC	1	400
Compound83	O=C(Nc1[nH]c2c(n1)cc(cc2)-c1cncnc1)NCC	1	20
Compound84	O=C(Nc1[nH+]cn(c1)-c1cc2nc([nH]c2cc1)NC(=O)NCC)C1CC1	1	4
Compound85	Fc1cc2[nH]c(nc2cc1-c1cccnc1)NC(=O)NCC	1	33
Compound86	O=C(Nc1[nH]c2cc(C)c(cc2n1)-c1cccnc1)NCC	1	61
Compound87	O(C)c1cc2[nH]c(nc2cc1-c1cccnc1)NC(=O)NCC	1	130
Compound88	O=C(Nc1[nH]c2cc(c(cc2n1)-c1cccnc1)-c1cncnc1)NCC	1	120
Compound89	O(C(=O)c1cc(cc2nc([nH]c12)NC(=O)NCC)-c1cccnc1)C	1	4
Compound90	O=C(NC)c1cc(cc2nc([nH]c12)NC(=O)NCC)-c1cccnc1	1	5
Compound91	O=C(Nc1[nH]c2c(n1)cc(cc2-n1nccc1)-c1cccnc1)NCC	1	4
Compound92	O=C(Nc1[nH]c2c(n1)cc(cc2-c1ncccc1)-c1cccnc1)NCC	1	4
Compound93	O1c2c(C(=O)C(OC(=O)CCc3ccc(cc3)C)=C1c1cc(O)c([O-])cc1)c(O)cc(OC(=O)CCc1ccc(cc1)C)c2	1	1660
Compound94	Fc1ccc(cc1)CCC(OC1=C(Oc2c(C1=O)c(O)cc(OC(=O)CCc1ccc(F)cc1)c2)c1cc(O)c([O-])cc1)=O	1	720
Compound95	O1c2c(C(=O)C(O[C@@H]3O[C@H](COC(=O)CCc4ccc(cc4)C)[C@H](O)[C@H](O)[C@H]3O)=C1c1cc(O)c([O-])cc1)c(O)cc([O-])c2	1	1790
Compound96	Fc1ccc(cc1)CCC(OC[C@H]1O[C@@H](OC2=C(Oc3c(C2=O)c(O)cc([O-])c3)c2cc(O)c([O-])cc2)[C@H](O)[C@@H](O)[C@H]1O)=O	1	1400
Compound97	O1c2c(C(=O)C(O[C@@H]3O[C@H](COC(=O)c4ccc(OCC)cc4)[C@H](O)[C@H](O)[C@H]3OC(=O)c3ccc(OCC)cc3)=C1c1cc(O)c([O-])cc1)c(O)cc([O-])c2	1	430
Compound98	O1c2c(C(=O)C(O[C@@H]3O[C@H](COC(=O)c4ccc(cc4)CCC)[C@H](O)[C@H](O)[C@H]3OC(=O)c3ccc(cc3)CCC)=C1c1cc(O)c([O-])cc1)c(O)cc([O-])c2	1	770
Compound99	Fc1ccc(cc1)C(O[C@@H]1[C@@H](O)[C@@H](O)[C@H](O[C@H]1OC1=C(Oc2c(C1=O)c(O)cc([O-])c2)c1cc(O)c([O-])cc1)COC(=O)c1ccc(F)cc1)=O	1	380
Compound100	O1c2c(C(=O)C(O[C@@H]3O[C@H](COC(=O)Cc4ccc(cc4)C)[C@H](O)[C@H](O)[C@H]3OC(=O)Cc3ccc(cc3)C)=C1c1cc(O)c([O-])cc1)c(O)cc([O-])c2	1	2210
Compound101	Fc1ccc(cc1)CC(O[C@@H]1[C@@H](O)[C@@H](O)[C@H](O[C@H]1OC1=C(Oc2c(C1=O)c(O)cc([O-])c2)c1cc(O)c([O-])cc1)COC(=O)Cc1ccc(F)cc1)=O	1	1050
Compound102	O1c2c(C(=O)C(O[C@@H]3O[C@H](COC(=O)CCc4ccc(O)cc4)[C@H](O)[C@H](O)[C@H]3OC(=O)CCc3ccc(O)cc3)=C1c1cc(O)c([O-])cc1)c(O)cc([O-])c2	1	2390
Compound103	O1c2c(C(=O)C(O[C@@H]3O[C@H](COC(=O)CCc4ccc(OCC)cc4)[C@H](O)[C@H](O)[C@H]3OC(=O)CCc3ccc(OCC)cc3)=C1c1cc(O)c([O-])cc1)c(O)cc([O-])c2	0	5390
Compound104	O1c2c(C(=O)C(O[C@@H]3O[C@H](COC(=O)CCc4ccc(cc4)C)[C@H](O)[C@H](O)[C@H]3OC(=O)CCc3ccc(cc3)C)=C1c1cc(O)c([O-])cc1)c(O)cc([O-])c2	1	2090
Compound105	Fc1ccc(cc1)CCC(O[C@@H]1[C@@H](O)[C@@H](O)[C@H](O[C@H]1OC1=C(Oc2c(C1=O)c(O)cc([O-])c2)c1cc(O)c([O-])cc1)COC(=O)CCc1ccc(F)cc1)=O	1	780
Compound106	Fc1ccc(cc1)CCCC(O[C@@H]1[C@@H](O)[C@@H](O)[C@H](O[C@H]1OC1=C(Oc2c(C1=O)c(O)cc([O-])c2)c1cc(O)c([O-])cc1)COC(=O)CCCc1ccc(F)cc1)=O	1	2980
Compound107	Fc1ccc(cc1)CCCCC(O[C@@H]1[C@@H](O)[C@@H](O)[C@H](O[C@H]1OC1=C(Oc2c(C1=O)c(O)cc([O-])c2)c1cc(O)c([O-])cc1)COC(=O)CCCCc1ccc(F)cc1)=O	0	5020
Compound108	O1c2c(C(=O)C(O[C@@H]3O[C@H](CO)[C@H](O)[C@H](O)[C@H]3O)=C1c1cc(O)c([O-])cc1)c(O)cc([O-])c2	1	100
Compound109	O1c2c(C(=O)C(O[C@@H]3O[C@H](CO)[C@H](O)[C@H](O)[C@H]3O)=C1c1cc(O)c([O-])cc1)c(O)cc(c2)[C@@H]1O[C@H](CO)[C@H](O)[C@H](O)[C@H]1O	1	260
Compound110	O1[C@@H](C)[C@@H](OC(=O)\C=C\c2ccc(O)cc2)[C@H](O)[C@H](OC(=O)\C=C\c2ccc(O)cc2)[C@H]1O[C@@H]1[C@@H](Oc2c(C1=O)c(O)cc(O)c2)c1ccc(O)cc1	1	3110
Compound111	Oc1ccc(cc1)\C=C\c1ccccc1-c1cc2nc([nH]c2cc1)NC(OCC)=O	0	20000
Compound112	O=C(NC=1[NH2+]c2cc(c(cc2N=1)-c1cccnc1)C1CCCCC1)NCC	1	120
Compound113	O=C(Nc1[nH]c2c(n1)cc(cc2NC)-c1cccnc1)NCC	1	5
Compound114	O=C(Nc1[nH]c2c(n1)cc(cc2-c1cccnc1)-c1cccnc1)NCC	1	6
Compound115	Fc1cccnc1-c1cc(cc2nc([nH]c12)NC(=O)NCC)-c1cccnc1	1	4
Compound116	O(Cc1ccccc1)c1cc(cc2nc([nH]c12)NC(=O)NCC)-c1cccnc1	1	18
Compound117	O(C)c1cc2[nH]c(nc2cc1-c1cnc(OC)nc1)NC(=O)NCC	1	15
Compound118	O=C(Nc1[nH]c2c(n1)cc(cc2-n1nccc1)-c1cncnc1)NCC	1	4
Compound119	O=C(Nc1[nH+]cn(c1)-c1cc(-n2nccc2)c2[nH]c(nc2c1)NC(=O)NCC)C1CC1	1	4
Compound120	O=C(Nc1[nH+]cn(c1)-c1cc(c2[nH]c(nc2c1)NC(=O)NCC)-c1ncccc1)C1CC1	1	4
Compound121	Fc1cccnc1-c1cc(cc2N=C([NH2+]c12)NC(=O)NCC)C1=CC(=O)N(C=C1)C	1	4
Compound122	O=C(NC=1N=C[C@@H](N=1)c1cc(-n2nccc2)c2[NH2+]C(=Nc2c1)NC(=O)NCC)C1CC1	1	4
Compound123	O=C(NC=1N=C[C@H](N=1)c1cc(c2[NH2+]C(=Nc2c1)NC(=O)NCC)-c1cncnc1)C1CC1	1	4
Compound124	s1c(-c2n[nH]c(c2)C(OCC)=O)c([nH+]c1-c1ccccc1)N1CCOCC1	1	630
Compound125	s1c(-c2n[nH]c(c2)C(OCC)=O)c(nc1-c1cccnc1)C	1	330
Compound126	s1c(-c2n[nH]c(c2)C(OCC)=O)c([nH+]c1-c1cccnc1)N1CCC(CC1)C	1	1050
Compound127	s1c(-c2n[nH]c(c2)C(OCC)=O)c(nc1-c1cccnc1)COC	1	280
Compound128	s1c(-c2n[nH]c(c2)C(OCC)=O)c(nc1-c1cccnc1)CO	1	670
Compound129	s1c(c(nc1-c1cccnc1)C1CCCCC1)-c1n[nH]c(c1)C(OCC)=O	1	120
Compound130	s1c(c(nc1-c1cccnc1)C1CC1)-c1n[nH]c(c1)C(OCC)=O	1	240
Compound131	s1c(c(nc1-c1cccnc1)-c1ccccc1)-c1n[nH]c(c1)C(OCC)=O	1	70
Compound132	s1c(-c2n[nH]c(c2)C(OCC#CC)=O)c([nH+]c1-c1cccnc1)N1CCCCC1	1	4
Compound133	s1c(-c2n[nH]c(c2)C(OCC#CC)=O)c(nc1-c1cccnc1)COC	1	14
Compound134	s1c(c(nc1-c1cccnc1)C1CCCCC1)-c1n[nH]c(c1)C(OCC#CC)=O	1	4
Compound135	s1c(-c2n[nH]c(c2)C(OC)=O)c([nH+]c1-c1ccccc1)N1CCC(O)CC1	1	1080
Compound136	s1c(-c2n[nH]c(c2)C(OCC#CC)=O)c(nc1-c1cccnc1)C(C)=C	1	14
Compound137	s1c(c(nc1-c1cccnc1)C1CCCCC1)-c1n[nH]c(c1)C(OCC#C)=O	1	4
