# Supplementary material for: Discovering new DNA gyrase inhibitors using machine learning approaches
Source: Royal Society of Chemistry journal article supplement (doi:10.1039/c5ra22568j), 2015-01-01
Supplement: c5ra22568j4.xlsx [file c5ra22568j4.xlsx]

## Sheet: External test
name	SMILES
1	S(=O)(=O)(NC1CCN(C1)Cc1ccc(OC(CC)CC)cc1)c1cc(F)ccc1CC
2	Clc1c2c([nH]c1CC)nc(Sc1cc3[NH+](O)[CH-]C=Cc3nc1)nc2N1C[C@@H]2[C@H](C1)C2N
3	Fc1c2N3[C@H]([C@@H](O[C@@H](C3)C)C)C3(Cc2cc2c1onc2C)C(=O)NC(=O)NC3=O
4	Clc1c2N3[C@H]([C@@H](O[C@@H](C3)C)C)C3(Cc2cc2c1onc2C)C(=O)NC(=O)NC3=O
5	Clc1c2N3[C@H]([C@@H](O[C@@H](C3)C)C)C3(Cc2cc2c1onc2C)C(=O)NC(=O)NC3=O
6	Fc1c2N3[C@H]([C@@H](O[C@@H](C3)C)C)C3(Cc2cc2c1onc2C)C(=O)NC(=O)NC3=O
7	Fc1c2N3[C@H]([C@@H](O[C@@H](C3)C)C)C3(Cc2cc2c1onc2OC)C(=O)NC(=O)NC3=O
8	Fc1c2N3[C@H]([C@@H](O[C@@H](C3)C)C)C3(Cc2cc2c1onc2C1CC1)C(=O)NC(=O)NC3=O
9	Fc1c2N3[C@H]([C@@H](O[C@@H](C3)C)C)C3(Cc2cc2c1onc2C(C)(C)C)C(=O)NC(=O)NC3=O
10	Fc1c2N3[C@H]([C@@H](C[C@@H](C3)C)C)C3(Cc2cc2c1onc2C)C(=O)NC(=O)NC3=O
11	Clc1noc2c1cc1CC3([C@@H]4N(c1c2F)C[C@H](O[C@H]4C)C)C(=O)NC(=O)NC3=O
12	Fc1c2N3[C@H]([C@@H](O[C@@H](C3)C)C)C3(Cc2cc2c1onc2OC)C(=O)NC(=O)NC3=O
13	Fc1c2N3[C@H]([C@@H](O[C@@H](C3)C)C)C3(Cc2cc2c1onc2N)C(=O)NC(=O)NC3=O
14	Oc1ccc(cc1)-c1[nH]c2cc(ccc2n1)-c1[nH]c2cc(N3CCN(CC3)CC)ccc2n1
15	Oc1ccc(cc1)-c1[nH]c2cc(ccc2n1)-c1[nH]c2cc(N3CCN(CC3)CCC)ccc2n1
16	Oc1ccc(cc1)-c1[nH]c2cc(ccc2n1)-c1[nH]c2cc(N3CCN(CC3)CCN(C)C)ccc2n1
17	Oc1ccc(cc1)-c1[nH]c2cc(ccc2n1)-c1[nH]c2cc(N3CCN(CC3)CCNC(=O)C)ccc2n1
18	Oc1ccc(cc1)-c1[nH]c2cc(ccc2n1)-c1[nH]c2cc(N3CCN(CC3)c3ccccc3)ccc2n1
19	Oc1ccccc1N1CCN(CC1)c1cc2[nH]c(nc2cc1)-c1cc2[nH]c(nc2cc1)-c1ccc(O)cc1
20	Fc1ccc(N2CCN(CC2)c2cc3[nH]c(nc3cc2)-c2cc3[nH]c(nc3cc2)-c2ccc(O)cc2)cc1
21	Oc1ccc(cc1)-c1[nH]c2cc(ccc2n1)-c1[nH]c2cc(N3CCN(CC3)c3ccc(N)cc3)ccc2n1
22	O(C)c1cc(ccc1OC)-c1[nH]c2cc(ccc2n1)-c1[nH]c2cc(N3CCN(CC3)CC)ccc2n1
23	O(C)c1cc(ccc1OC)-c1[nH]c2cc(ccc2n1)-c1[nH]c2cc(N3CCN(CC3)CCC)ccc2n1
24	O(C)c1cc(ccc1OC)-c1[nH]c2cc(ccc2n1)-c1[nH]c2cc(N3CCN(CC3)CCN(C)C)ccc2n1
25	O(C)c1cc(ccc1OC)-c1[nH]c2cc(ccc2n1)-c1[nH]c2cc(N3CCN(CC3)c3ccccc3)ccc2n1
26	O(C)c1cc(ccc1OC)-c1[nH]c2cc(ccc2n1)-c1[nH]c2cc(N3CCN(CC3)c3ccccc3C#N)ccc2n1
27	O(C)c1cc(ccc1OC)-c1[nH]c2cc(ccc2n1)-c1[nH]c2cc(N3CCN(CC3)c3ccncc3)ccc2n1
28	O(C)c1cc(ccc1OC)-c1[nH]c2cc(ccc2n1)-c1[nH]c2cc(N3CCN(CC3)c3ncccn3)ccc2n1
29	O(C)c1cc(ccc1OC)-c1[nH]c2cc(ccc2n1)-c1[nH]c2cc(N3CCN(CC3)c3ccc(N)cc3)ccc2n1
30	O(CC)c1ccc(cc1)-c1[nH]c2cc(ccc2n1)-c1[nH]c2cc(N3CCN(CC3)CC)ccc2n1
31	O(CC)c1ccc(cc1)-c1[nH]c2cc(ccc2n1)-c1[nH]c2cc(N3CCN(CC3)CCC)ccc2n1
32	O(CC)c1ccc(cc1)-c1[nH]c2cc(ccc2n1)-c1[nH]c2cc(N3CCN(CC3)CCN(C)C)ccc2n1
33	O(CC)c1ccc(cc1)-c1[nH]c2cc(ccc2n1)-c1[nH]c2cc(N3CCN(CC3)CCNC(=O)C)ccc2n1
34	S1\C(\NC(=O)C1Cc1ccc(cc1)C)=N\N=C\c1cc([N+](=O)[O-])ccc1
35	O(C)c1c(OC)cc(cc1OC)C1N(CCn2c1ccc2)C(=O)NC(C)(C)C
36	O1Cc2c(CC1(C)C)c1c3ncnc(NCc4occc4)c3oc1nc2CCC
37	S(C(C(=O)N1CCNC1=O)C)c1oc(nn1)-c1ccc(cc1)C(C)(C)C
38	o1c(ccc1OC)C(=O)N1CC(CCC1)C(=O)Nc1ccc(cc1)-c1occc1
39	S(CC=1N=C(NC(=O)C=1)N1CCN(CC1)c1ccccc1)c1nc(ccn1)C
40	S(=O)(=O)(Nc1cc(ccc1)-c1nnnn1C1CC1)c1c(cc(cc1C)C)C
41	s1ccc(S(=O)(=O)Nc2cc3OC4(Oc3cc2)CCCC4)c1C(OC)=O
42	O=C1NC(=O)N(c2nc(n(c12)CCC)-c1ccc(cc1)C#N)Cc1ccccc1
43	Clc1cc(NS(=O)(=O)c2c3nsnc3ccc2)c(OC)cc1OC
44	O1CCCOc2c1cc(cc2)C(NC(=O)c1cc2nnn(c2cc1)CC)C(C)C
45	FC(F)Oc1ccccc1C1Nc2n(nnn2)C(C1)c1ccc(OC)cc1
46	O1C=C(\C=N\NC(=O)C(Oc2c3ncccc3ccc2)C)C(=O)c2c1cccc2
47	S1c2c(NC(=O)C1C)cc(cc2)C(OCc1noc(c1)-c1occc1)=O
48	s1cc(c2N=CN3C(=NN(CC(=O)NC(CC)C)C3=O)c12)-c1ccc(cc1)C
49	S(C(C(=O)Nc1c2c(nccc2)ccc1)C)c1nnc(n1C)-c1ccoc1C
50	S(=O)(=O)(Nc1ncc(cc1)C)c1cc(ccc1C)-c1nc(on1)C1CC1
51	S1c2n(ncn2)C([O-])=C1C([N@H+]1CCCCC1C)c1cccc(OC)c1OC
52	O=C(Nc1n2c(nn1)C=CC=C2)CCc1nc2c(n1-c1ccccc1)cccc2
53	Clc1cc(OCC(=O)Nc2cc(ccc2)C2=Nn3c(nnc3)C=C2)ccc1
54	Clc1ccc(-n2c(C)c(cc2C)\C=N\Nc2ncc([N+](=O)[O-])cc2)cc1
55	S1C=C(N2C1=NC(=CC2=O)CSc1[nH]nc(n1)-c1ccc(OC)cc1)C
56	Fc1ccccc1CNc1ccc(N2C(=O)C3C(CC=CC3)C2=O)cc1[N+](=O)[O-]
57	O=C(Nc1cnc(nc1)C(C)(C)C)c1cc(nc2n(ncc12)C(C)C)C(C)C
58	S(=O)(=O)(Nc1n(ncc1)Cc1cc(ccc1)C)c1cc2C=CC(Oc2cc1)=O
59	S\1C=C(N/C/1=N/N=C/c1occc1)c1ccc(S(=O)(=O)N(C)C)cc1
60	Clc1ccc(N2CCN(CC2)c2[nH+]c3c(CCC3)c(OCC(=O)[O-])n2)cc1
61	S(Cc1nc(nc(n1)N)Nc1ccccc1CC)c1nnc(n1N)-c1ccc(OC(F)F)cc1
62	S(=O)(=O)([O-])c1c2c(ccc1)c(N=Nc1cc(N=Nc3cc([N+](=O)[O-])ccc3[O-])c(N)cc1N)ccc2
63	S(=O)(=O)(N)c1ccc(NC(=O)\C(=N\Nc2ccc(S(=O)([O-])=Nc3noc(c3)C)cc2)\C#N)cc1
64	s1c2c(CCC2)c(C(OC)=O)c1NC(=O)CSc1nnc(n1N)N\N=C\c1cn(nc1)C(C)C
65	S(=O)(=O)(\N=C\1/C=C(NNC(=O)c2cc(O)cc(O)c2)C(=O)C2=C/1CC=CC2)c1ccc(OC)cc1
66	O=C1NC(=O)N(CCOC)C(N)=C1N(Cc1ccccc1)C(=O)CN1C(=O)[C@](NC1=O)(C)c1ccccc1
67	S(=O)(=O)(Nc1ccc(cc1)C(=O)N1CCN(CC1)c1ccccc1O)c1cc2NC(=O)Nc2cc1
68	S(=O)(=O)(N(CC)CC)c1ccc(Nc2ncnc(NNS(=O)(=O)c3ccc(cc3)C)c2N)cc1
69	S(=O)(=O)(N1CCC(CC1)c1ccccc1)c1cc([N+](=O)[O-])ccc1NN\C=C/1\C(=O)NC(=O)NC\1=O
70	S(=O)(=O)(NCCc1n2N=C(NCCc3ccc(S(=O)(=O)N)cc3)C=Cc2nn1)c1ccc(cc1)C
71	O(CC)c1ccc(cc1)C1NC(=O)NC(CN2CCC(N3CCCCC3)(CC2)C(=O)N)=C1C(OC)=O
72	O1C(CO)C(O)C(O)C(NC(=O)C)C1OC1CC[C@@]2(C(CC[C@@]3(C2CC=C2C4CC(CC[C@]4(C(O)=O)C(O)C[C@@]23C)(C)C)C)C1(C)C)C
73	O[C@@]1(CCC2C3C(CC[C@]12C)[C@@]1(C(=C/C(=N/OCC(=O)NC(C(C)C)C(=O)NC(CCC(O)=O)C(=O)[O-])/CC1)CC3)C)C#C
74	O1C(C)C(O)C(OC)CC1OC1C[C@@]2(O)CCC3C(CC[C@@]4(C)[C@]3(O)CCC4C3=CC(OC3)=O)[C@]2(CC1)\C=N\CCCO
75	FC1(F)[C@@](O)(c2ccccc2C(=O)[O-])C(OC1N1C=CC(=NC1=O)N)C(O)c1ccccc1C(=O)[O-]
76	S(=O)(=O)(N(C(CCC\[NH+]=C(\N)/N)C(=O)[O-])C(OC(C)(C)C)=O)c1c(C)c(c2OC(Cc2c1C)(C)C)C
77	O1[C@](NC(=O)C2CC3C(N(C2)C)Cc2c4c3cccc4[nH]c2)(C)C(=O)N2[C@]1(O)C1N(C(=O)C2Cc2ccccc2)C(O)CC1
78	Clc1cc2c(NC(=O)[C@@]23NC(C2C3C(=O)N(CCc3cc(OC)c(OC)cc3)C2=O)CC(=O)N)cc1
79	O1C(C(=O)[O-])C(O)C(O)C(O)C1OC(=O)CC(C)C1CCC2C3C(CC[C@]12C)[C@@]1(C(CC3O)CC(O)CC1)C
80	O1C2C(OC(OC2)C)C(O)C(O)C1OC1C2C(C(c3c1cc1OCOc1c3)c1cc(OC)c(O)c(O)c1)C(OC2)=O
81	O1C(C(=O)[O-])C(O)C(O)C(O)C1n1nnnc1-c1ccccc1-c1ccc(cc1)Cn1c2c([nH+]c1OCC)cccc2C(=O)[O-]
82	S(CCC)c1nc(NC2CC2c2cc(F)c(F)cc2)c2nnn(c2n1)C1CC(OCCO)C(O)C1O
83	Clc1ccccc1CN(C(C(=O)NCc1ccc(F)cc1)c1ccncc1)C(=O)Cn1nc(nn1)-c1sccc1
84	O(C(=O)C)c1ccc(cc1OCC)C1C2=C(N=C(C)[C@H]1C(OC(C)C)=O)CC(CC2=O)c1cc(OC)c(OC)cc1
85	Clc1ccccc1C(=O)N1c2c(C3=C(SC(C(OC)=O)=C(C(OC)=O)C34SC(C(OC)=O)=C(S4)C(OC)=O)C1(C)C)cc(cc2)C
86	P(OC(C)C)(OC(C)C)(=O)C(N(\C(=N\C=1OC(=NC(N=1)(C(F)(F)F)C(F)(F)F)C(C(F)(F)F)C(F)(F)F)\N)C)C(C)C
87	FC(F)(F)C1n2nc(cc2NC(C1)c1cc(OC)c(OC)cc1)C(=O)Nc1c(n(nc1C)Cc1cc(Oc2ccccc2)ccc1)C
88	Clc1cc(cc(OC)c1OCc1c2c(ccc1)cccc2)\C=N\Nc1nc(nc(n1)N1CCCC1)N1CCCC1
89	Clc1cc(cc(OCC)c1OCCOc1ccccc1OC)\C=C/1\C(N2N=C(SC2=NC\1=O)Cc1ccccc1)=N
90	s1cnc(C)c1\C=C/C=1CSC2N(C(=O)C2NC(=O)\C(=N/OC)\c2nc(sc2)N)C=1C(OCOC(=O)C(C)(C)C)=O
91	S=C1NC(=O)/C(=C\c2cc(COc3ccc(NC(=O)C)cc3)c(OC)cc2)/C(=O)N1c1cc(OC)ccc1OC
92	Clc1ccc(cc1)COc1ccccc1\C=N\NC(=O)C(NC(=O)c1ccccc1)C1=NNC(=O)c2c1cccc2
93	Clc1ccc(cc1)\C=C\1/SC=2N(C(C(C(OCCOC)=O)=C(N=2)C)c2ccc(OC(=O)c3occc3)cc2)C/1=O
94	O(C(=O)C)C1C(=C)C(OC(=O)C)C2[C@](OC(=O)C)(C[C@](OC(=O)C)(C)C2OC(=O)C)C(=O)C(\C=C\C(C)(C)C(=O)C1OC(=O)C(C)C)C
95	O=C1C(C(OC)=O)C(C=C(N2CCN(CC2)C/2=CC(C)(C)C(C(OC)=O)C(=O)\C\2=C(\[O-])/CCC)C1C(=O)CCC)(C)C
96	O(CC1c2c(-c3c1cccc3)cccc2)C(=O)NC(Cc1n(c[nH+]c1)C(OCC1c2c(-c3c1cccc3)cccc2)=O)C(=O)[O-]
97	O1C(C(OC)=O)C(OC(=O)C)C(OC(=O)C)C(OC(=O)C)C1O[C@]1(CCC2C3C(C4C(=CC(=O)CC4)CC3)CC[C@]12CC)C#C
98	O(C(=O)c1ccccc1)C1C2[C@](O)(CC1C)C(OC(=O)C)[C@]1(C3C(C[C@@](OC(=O)C)(C1OC(=O)C)C2OC(=O)COC(=O)C)C(=O)C(C3)(C)C)C
99	O1C(C)C(O)C(O)C(O)C1Oc1c(C)c(nc(OC)c1OC)C\C=C(\C\C=C\C(=C\C(C(O)\C(=C\C)\C)C)\C)/C
100	O(CCNCC(O)COc1c2c3c(n(c2ccc1)CC(O)COc1c2c4c([nH]c2ccc1)cccc4)cccc3)c1ccccc1OC
101	s1cccc1CC(NC(=O)C1N(CCC(n2nnc(C(=O)N)c2C(=O)N)C1)C(=O)c1nc(sc1)C)C(=O)N
102	O1CC[NH+](CC1)Cc1nnn(c1C(=O)N\N=C(/C)\c1cc(OC)c(OCC(=O)N)cc1)-c1nonc1N
103	S(SC1=NC(=O)N(C=C1)C1OC(CO)C(O)C1O)C1=NC(=O)N(C=C1)C1OC(CO)C(O)C1O
104	O1C(CO)C(O)C(O)C(O)C1Nc1ccc(cc1)-c1ccc(NC2OC(CO)C(O)C(O)C2O)cc1
105	O1C(CO[C@]2(OC(C(O)C(O)CO)C(NC(=O)C)C(O)C2)C(=O)[O-])C(O)C(O)C(NC(=O)C)C1O
106	OC1C(NC(=O)CC2(CCCC2)CC(O)=O)C[C@](O)(CC1O)C(=O)NC(Cc1ccc(O)cc1)C(=O)N
107	O1C(C(O)C(O)C(O)C1CO)c1c([O-])c(c2OC(=CC(=O)c2c1O)c1ccccc1)C1OCC(O)C(O)C1O
108	O1C(CO)C(O)C(O)C(O)C1OC1OCCC2C1[C@@](O)(CO)C([NH2+]CCc1cc(OC)c(OC)cc1)C2O
109	O1C(CO)C(O)C(O)C1n1c2ncnc(N)c2nc1NCCCNc1nc2c(ncnc2N)n1C1OC(CO)C(O)C1O
110	O=C1N(C(=O)CC1[NH2+]C1CCCCNC1=O)c1ccc(N2C(=O)C([NH2+]C3CCCCNC3=O)CC2=O)cc1
111	Oc1c2c(CC3C(=C(O)[C@@]4(O)C(C3)C(N(C)C)C(=O)\C(=C(/O)\N)\C4=O)C2=O)c(N(C)C)cc1NC(=O)C[NH2+]C(C)(C)C
112	[S-]CC1NC(=O)C(NC(=O)C(NC(=O)CNC(=O)C(NC1=O)CCCNC(=[NH2+])N)CC(=O)[O-])Cc1ccccc1
113	O1C(C)C(O)C([NH3+])C(O)C1OC1\C=C\C=C\C=C/C=C\CC(OC(=O)\C=C\C2OC2CC(O)CC(=O)CC(O)C(C(=O)[O-])C(O)C1)C
