# Supplementary material for: Discovering new DNA gyrase inhibitors using machine learning approaches
Source: Royal Society of Chemistry journal article supplement (doi:10.1039/c5ra22568j), 2015-01-01
Supplement: c5ra22568j5.xlsx [file c5ra22568j5.xlsx]

## Sheet: External test
name	SMILES
XGS00001	O1C(=CC(OC)=CC1=O)\C=C\c1ccccc1OC
XGS00002	O1C(=CC(OC)=CC1=O)\C=C\c1ccccc1
XGS00003	O1C(=CC(OC)=CC1=O)\C=C\c1cc(OC)ccc1
XGS00004	Clc1ccc(cc1)\C=C\C=1OC(=O)C=C(OC)C=1
XGS00005	O1C(=CC(OC)=CC1=O)\C=C\c1ccc(N(C)C)cc1
XGS00006	O1C(=CC(OC)=CC1=O)\C=C\C1CCCCC1
XGS00009	O(C)C=1C=C(CC(=O)C=1)C(=O)\C=C\c1ccccc1
XGS00008	O(C)c1ccccc1\C=C\C(=O)C=1CC(=O)C=C(OC)C=1
XGS00009	O1C(=CC(OC)=CC1=O)C(=O)\C=C\c1cc(OC)ccc1
XGS00010	O1C(=CC(OC)=CC1=O)C(=O)\C=C\c1ccc(OC)cc1
XGS00011	Clc1ccccc1\C=C\C(=O)C=1OC(=O)C=C(OC)C=1
XGS00012	Clc1cc(ccc1)\C=C\C(=O)C=1OC(=O)C=C(OC)C=1
XGS00013	Clc1ccc(cc1)\C=C\C(=O)C=1OC(=O)C=C(OC)C=1
XGS00014	O1C(=CC(OC)=CC1=O)C(=O)\C=C\C1CCCCC1
XGS00015	O1C(=CC(OC)=CC1=O)C(=O)\C=C\c1c(OC)cccc1OC
XGS00016	O1C(=CC(OC)=CC1=O)C(=O)\C=C\c1ccc(cc1)C=O
XGS00017	O1C(=CC(OC)=CC1=O)C(=O)\C=C\c1cc(ccc1)C=O
XGS00018	O1C(=CC(OC)=CC1=O)\C=C\C(O)=O
XGS00019	O1C(=CC(OC)=CC1=O)\C=C\C(OCCc1ccccc1)=O
XGN00001	Oc1cc(ccc1C(CC\C=C(\C)/C)C)C
XGN00002	Oc1cc(ccc1C(CC\C=C(\C)/C)C)COC(=O)\C=C(\C)/C
XGN00003	O(C(=O)\C=C\c1cc(O)c(O)cc1)C1CC(O)(C[C@H](OC(=O)\C=C\c2cc(O)c(O)cc2)C1O)C(OC)=O
XGN00004	O(C(=O)\C=C/c1cc(O)c(O)cc1)C1C(OC(=O)\C=C\c2cc(O)c(O)cc2)CC(O)(CC1O)C(OC)=O
XGN00005	O1[C@@H]2\C=C(/C[C@@H]3OC(=O)C(C[C@H](OC(=O)C(C)=C)C2C(=C)C1=O)=C3)\C
XGN00006	O1[C@H]\2[C@@H]([C@@H](OC(=O)\C(=C/C)\C)CC3=C[C@H](OC3=O)C\C(=C/2)\C)C(=C)C1=O
XGN00007	O1[C@H]\2[C@@H]([C@@H](OC(=O)\C(=C/C)\C)CC3=C[C@@H](OC3=O)C\C(=C/2)\C)C(=C)C1=O
XGN00008	O1[C@H]\2[C@@H]([C@@H](OC(=O)C(C)=C)CC3=C[C@H](OC3=O)C\C(=C/2)\C)C(=C)C1=O
XGN00009	O[C@H]1CC[C@]2(C(CC[C@@]3(C2CCC2C4[C@@](CC[C@]23C)(CC[C@H]4C(C)=C)C)C)C1(C)C)C
XGN00010	O(C(=O)C)[C@H]1CC[C@]2(C(CC[C@@]3(C2CCC2C4[C@@](CC[C@]23C)(CC[C@H]4C(C)=C)C)C)C1(C)C)C
XGN00011	O(C(=O)CCCCCCCCCCCCCCCC)[C@H]1CC[C@]2(C(CC[C@@]3(C2CC=C2C4[C@@H](C)[C@@H](CC[C@@]4(CC[C@]23C)C)C)C)C1(C)C)C
XGN00012	O(C(=O)C(NC(=O)c1ccccc1)Cc1ccccc1)CC(NC(=O)C)Cc1ccccc1
XGN00013	O[C@@H]1CC2=CC[C@H]3[C@@H]4CC[C@H]([C@@H](CC[C@H](C(C)C)CC)C)[C@]4(CCC3[C@]2(CC1)C)C
XGS00020	O1C(=CC(OC)=CC1=O)\C=C\C=C\c1ccccc1
XGS00021	O1C(=CC(OC)=CC1=O)\C=C\c1oc(cc1)C
XGS00022	O1C(=CC(OC)=CC1=O)\C=C\c1occc1
XGS00023	s1cccc1\C=C\C=1OC(=O)C=C(OC)C=1
XGS00024	OC=1C=C(NC(=O)C=1)\C=C\c1ccccc1
XGS00025	O(C)c1ccccc1\C=C\C=1NC(=O)C=C(O)C=1
XGS00026	O(C)c1cc(ccc1)\C=C\C=1NC(=O)C=C(O)C=1
XGS00027	O(C)c1ccc(cc1)\C=C\C=1NC(=O)C=C(O)C=1
XGS00028	Clc1ccc(cc1)\C=C\C=1NC(=O)C=C(O)C=1
XGS00029	OC=1C=C(NC(=O)C=1)\C=C\C1CCCCC1
XGS00030	OC=1C=C(NC(=O)C=1)\C=C\C=C\c1ccccc1
XGS00031	o1c(ccc1\C=C\C=1NC(=O)C=C(O)C=1)C
XGS00032	o1cccc1\C=C\C=1NC(=O)C=C(O)C=1
XGS00033	s1cccc1\C=C\C=1NC(=O)C=C(O)C=1
XGS00034	O=C(\C=C\c1n(ccc1)C)c1cc(cc(c1)C)C
XGS00035	O1C(=CC(OC)=CC1=O)\C=C\c1ccc(OC)cc1
XGS00036	Clc1ccccc1\C=C\C=1OC(=O)C=C(OC)C=1
XGN00014	O1c2c(C(=O)C=C1c1ccc(OC)cc1)c(O)cc(O)c2
XGN00015	O1[C@H]2[C@@H](CC[C@@](O)([C@@]34[C@@H]2[C@](C=C3)(C)[C@]2([C@H]3[C@H](OC2=O)[C@@H]2[C@@H](CC=C2C)[C@](O)(C[C@@H]3OC(=O)\C(=C/C)\C)C)C4)C)C(=C)C1=O
XGN00016	O1c2c(C(=O)C=C1c1ccc(OC)cc1)c(O)cc(OC)c2
XGN00017	O(C)[C@H]1C=C(C)C([C@H]2C3CC[C@H]4[C@](CC[C@@H]5[C@@]4(CC[C@H](O)C5(C)C)C)(C)[C@@]3(C[C@H](O)[C@@]12C)C)C
XGN00018	O(C(=O)[C@@H](NC(=O)c1ccccc1)Cc1ccccc1)C[C@@H](NC(=O)c1ccccc1)Cc1ccccc1
XGN00019	O1[C@@H]2[C@H](CC[C@](O)(C34C2C(C=C3)(C)[C@]2([C@@H]3C[C@@]3(CC2=O)C(C)C)C4)C)C(=C)C1=O
XGN00020	O(C(=O)[C@@H](NC(=O)c1ccccc1)Cc1ccccc1)C[C@@H](NC(=O)C)Cc1ccccc1
XGN00021	O1c2c(C(=O)C(=C1c1ccc(OC)cc1)c1c3OC(=CC(=O)c3c(O)cc1O)c1ccc(OC)cc1)c(O)cc(OC)c2
XGN00022	OC1C[C@]2([C@H](C3=CC(O)[C@H]4[C@](CC[C@@H]5[C@@]4(CC[C@H](OC(=O)CCCCCCCCCCCCCCC)C5(C)C)C)(C)[C@@]3(CC2)C)[C@@H](C)[C@@H]1C)C
XGN00023	O1[C@H]2C(CC[C@@](O)(C34C2[C@](C=C3)(C)[C@]2(C3[C@H](OC2=O)C2C(CC=C2C)[C@](O)(C[C@@H]3OC(=O)C)C)C4)C)C(=C)C1=O
XGN00024	O1[C@H]2[C@@H]([C@@H](OC(=O)C)C[C@@](O)([C@H]3[C@@H]2C(=CC3)C)C)C(=C)C1=O
XGN00025	O1c2c(C(=O)C=C1c1cc(OC)c(OC)cc1)c(O)cc(OC)c2OC
XGN00026	O1[C@@H]2[C@@H]3[C@@H](CC=C3C)[C@](O)(C[C@H](O)C2[C@H](C)C1=O)C
XGN00027	O1c2c(C(=O)C=C1c1cc(-c3cc(ccc3OC)C=3Oc4c(C(=O)C=3)c(O)cc(OC)c4)c(OC)cc1)c(O)cc(OC)c2
XGN00028	O1C2C(CCC(=C3C2C(=CC3=O)C)C)C(C)C1=O
XGN00029	O1c2c(c(O)c(O)c(O)c2)C(=O)C=C1c1cc(OC)c(OC)c(OC)c1
XGN00030	O1[C@H]2C(CC[C@@](O)(C34C2[C@](C=C3)(C)[C@]2(C3[C@H](OC2=O)C2C5(C[C@@]6(C7[C@H](OC6=O)C6C(CC=C6C)[C@](O)(C[C@@H]7OC(=O)C)C)[C@@]2(C=C5)C)[C@](O)(CC3)C)C4)C)C(=C)C1=O
XGN00031	O1[C@@H]2[C@@H]3[C@@H](CC=C3C)[C@](O)(C[C@@H](O)[C@H]2[C@H](C)C1=O)C
XGN00032	O[C@H]1CC[C@]2([C@@H](CC[C@@]3([C@@H]2CCC2[C@H]4[C@](C)([C@@H](O)C=C(C)C4C)[C@@H](O)C[C@]23C)C)C1(C)C)C
XGN00033	O1[C@H]2[C@@H](CC[C@@](O)([C@@]34[C@@H]2[C@](C=C3)(C)[C@]2([C@H]3[C@H](OC2=O)[C@@H]2[C@@H](CC=C2C)[C@](O)(C[C@@H]3O)C)C4)C)C(=C)C1=O
XGN00034	O1c2c(C(=O)C=C1c1cc(O)c(O)cc1)c(O)cc(O)c2
XGN00035	O1[C@@H](Oc2cc(O)c3c(OC(=CC3=O)c3ccc(OC)cc3)c2)[C@@H](O)C(O)[C@H](O)C1CO
XGN00036	O1[C@H]2[C@@H]([C@@H](OC(=O)\C(=C/C)\C)C[C@@](O)([C@H]3[C@@H]2C(=CC3)C)C)C(=C)C1=O
XGN00037	O1C2C([C@@H](OC(=O)\C(=C/C)\C)C[C@@](O)(C3C2C(=CC3)C)C)C(C)C1=O
XOS00001	S(=O)(=O)(\N=C(\N)/N)c1ccc(\N=C\c2cc(O)c(OC)cc2)cc1
XGN00038	O1[C@H]2[C@@H](CC[C@@](O)([C@@]34[C@@H]2[C@](C=C3)(C)[C@]2([C@H]3[C@H](OC2=O)[C@@H]2[C@@H](CC=C2C)[C@](O)(C[C@@H]3OC(=O)\C(=C/C)\C)C)C4)C)C(=C)C1=O
XGN00039	OC1C[C@]2(C(CC[C@@]3(C2CCC2C4[C@@H](CCC4(CC[C@]23C)CO)C(C)=C)C)C(C)(C)[C@H]1OC(=O)CCCCCCCCCCCCCCC)C
XGN00040	O1C=2[C@@]3(Oc4c([C@H]5[C@@H]3[C@@H](C[C@@H](C)[C@@H]5C)C(=O)C=2)cc2OCOc2c4)OC1
XGN00041	O1[C@@H]([C@@H](C)[C@@H](C)[C@@H]1c1cc(OC)c2OCOc2c1)c1cc(OC)c(OC)c(OC)c1
XGN00042	O1[C@@H]([C@H](C)[C@@H](C)[C@H]1c1cc(OC)c(O[C@@H]([C@H](O)c2cc(OC)c(OC)cc2)C)cc1)c1cc(OC)c(OC)cc1
XGN00043	O1[C@@H]([C@H](C)[C@H](C)[C@@H]1c1cc(OC)c(OC)cc1)c1cc(OC)c(OC)cc1
XGN00044	O[C@@H]1CC2=CC[C@H]3[C@@H]4CC[C@H]([C@@H](CC[C@H](C(C)C)CC)C)[C@]4(CC[C@@H]3[C@]2(CC1)C)C
XGN00045	O(C(C(OC(=O)C)c1cc(OC)c(OC)c(OC)c1)C)c1c(OC)cc(cc1OC)CC=C
XGN00046	O1[C@@H]([C@H](C)[C@@H](C)[C@H]1c1cc2OCOc2cc1)c1cc(OC)c(O[C@@H]([C@H](O)c2cc(OC)c(OC)cc2)C)cc1
XGN00047	O(C(C(O)c1cc(OC)c(O)cc1)C)c1ccc(cc1OC)\C=C\C
XGN00048	O1[C@H]([C@@H](C)[C@@H](C)[C@H]1c1cc(OC)c(O)cc1)c1cc(OC)c(OC)cc1
XGN00049	O1[C@@H]([C@@H](C)[C@@H](C)[C@@H]1c1cc(OC)c(OC)cc1)c1cc(OC)c(O)c(OC)c1
XGN00050	O1[C@H]([C@H](C)[C@H](C)[C@H]1c1cc(OC)c(O)c(OC)c1)c1cc(OC)c(OC)c(OC)c1
XGN00051	O1c2c(OC1)cc(cc2OC)C(O)C(Oc1c(OC)cc(cc1OC)CC=C)C
XGN00052	O1c2c(OC1)cc(cc2OC)C(O)C(Oc1c(OC)cc(cc1OC)\C=C\C)C
XGN00053	O(C)c1c(OC)cc(cc1OC)[C@H](O)[C@@H](Oc1c(OC)cc(cc1OC)\C=C\C)C
XGN00054	O(C(C(OC(=O)C)c1cc(OC)c(OC)c(OC)c1)C)c1c(OC)cc(cc1OC)\C=C\C
XGN00055	O1[C@@H]([C@H](C)[C@@H](C)[C@H]1c1cc(OC)c(O[C@@H]([C@H](O)c2cc3OCOc3cc2)C)cc1)c1cc(OC)c(O[C@H]([C@@H](O)c2cc(OC)c(OC)cc2)C)cc1
XGN00056	O1[C@@H]([C@H](C)[C@@H](C)[C@H]1c1cc(OC)c(OC(C(O)c2cc3OCOc3cc2)C)cc1)c1cc(OC)c(OC(C(O)c2cc(O)c(OC)cc2)C)cc1
XGN00057	O1[C@@H]([C@H](C)[C@@H](C)[C@H]1c1cc(OC)c(O[C@@H]([C@@H](O)c2cc3OCOc3cc2)C)cc1)c1cc(OC)c(O[C@H]([C@H](O)c2cc(OC)c(O)cc2)C)cc1
XGN00058	O1[C@H]([C@@H](C)[C@H](C)[C@H]1c1cc(OC)c(O)cc1)c1cc(OC)c(O[C@@H]([C@H](O)c2cc(OC)c(O)cc2)C)cc1
XGN00059	O1[C@@H]([C@H](C)[C@@H](C)[C@H]1c1cc(OC)c(OC(C(O)c2cc(OC)c(OC)cc2)C)cc1)c1cc(OC)c(OC(C(O)c2cc(OC)c(OC)cc2)C)cc1
XGN00060	O1[C@@H]([C@H](C)[C@@H](C)[C@H]1c1cc(OC)c(OC(C(O)c2cc(O)c(OC)cc2)C)cc1)c1cc(OC)c(OC(C(O)c2cc(OC)c(OC)cc2)C)cc1
XGN00061	O1c2cc(ccc2OC1)C(O)C(Oc1ccc(cc1OC)C(=O)[C@H]([C@H](C(=O)c1cc(OC)c(OC(C(O)c2cc(OC)c(OC)cc2)C)cc1)C)C)C
XGN00062	O1[C@]2(O[C@@]2(C)[C@@H](C)[C@H]1c1cc(OC)c(OC(C(O)c2cc(OC)c(OC)cc2)C)cc1)c1cc(OC)c(OC(C(O)c2cc(OC)c(OC)cc2)C)cc1
XGN00063	O(C(C(=O)c1cc(OC)c(OC)c(OC)c1)C)c1c(OC)cc(cc1OC)\C=C\CO
XGN00064	O(C(C(OC(=O)C)c1cc(OC)c(OC)c(OC)c1)C)c1c(OC)cc(cc1OC)\C=C\CO
XGN00065	O(C(C(OC(=O)C)c1cc(OC)c(OC)c(OC)c1)CO)c1c(OC)cc(cc1OC)CC=C
XGN00066	O1[C@@H]([C@@H](C)[C@@H](C)[C@@H]1c1cc(OC)c(OC)c(O)c1)c1cc(OC)c(OC)c(OC)c1
XGN00067	O(C)c1c(OC)cc(cc1OC)\C=C\CO
XGN00068	O[C@@]1([C@H]2[C@H]([C@H]3[C@@H](CC1)C3(C)C)[C@@](O)(CC2)C)C
XGN00069	O1[C@@H]([C@H](C)[C@H](C)[C@H]1c1cc(OC)c(OC)c(OC)c1)c1cc(OC)c(OC)c(OC)c1
XGN00070	O1[C@@H]([C@@H](C)[C@@H](C)[C@@H]1c1cc(OC)c(OC)cc1)c1cc(OC)c(OC)c(OC)c1
XGN00071	O(C)c1c(OC)cc(cc1OC)C(=O)[C@@H](Oc1c(OC)cc(cc1OC)CC=C)C
XGN00072	O(C)c1cc(ccc1OC)C(O[C@H]([C@@H](C(=O)C)C)c1cc(OC)c(OC)cc1)=O
XGN00078	OC(CNC(=O)\C=C\CC\C=C/C=C/C=O)(C)C
XGN00074	OC(CNC(=O)\C=C\CC\C=C\C=C\C=C\C)(C)C
XGN00075	O1c2c(C(=O)C(O)=C1c1ccc(OC)cc1)c(O)cc(OC)c2O
XGN00076	O1c2c(C(=O)C(O)=C1c1ccc(OC)cc1)c(O)cc(OC)c2
XGN00077	O=C1N2C(=Nc3c1cccc3)c1[nH]c3c(c1CC2)cccc3
XGN00078	O1c2c(c(O)c(OC)c(OC)c2O)C(=O)C=C1c1ccc(OC)cc1
XGN00079	OC(CNC(=O)\C=C\CC\C=C\C=C\C=O)(C)C
XGN00080	OC(CNC(=O)\C=C\CCC(=O)\C=C\C=C\C(=O)C)(C)C
XGN00081	OC(CNC(=O)\C=C\CCC(O)\C=C\C=C\C(=O)C)(C)C
XGN00082	OC(CNC(=O)\C=C\CCC(=O)\C=C\C=C\C(O)C)(C)C
XGN00083	S=Cc1ccc(OC)cc1
XGN00084	O(C(=O)c1ccccc1C(OCC(CCCC)CC)=O)CC(CCCC)CC
XGN00085	O1[C@@H](Oc2cc(OC)c(C(=O)C)c(O)c2)[C@H](O)C(O)[C@H](O)C1CO
XGN00086	O(C)C1=CC(=O)C(C)=C(O)C=C1OC
XGN00087	O(C(C(O)c1cc(OC)c(O)cc1)C)c1ccc(cc1OC)\C=C\C
XGN00088	OC(C[C@@H]1N(C)[C@@H](C=CC1)CC(=O)CC)CC
XGN00089	O=C1C2=CC(=O)CC[C@@]2(C2C(C1)C1CC[C@H](C(CCC(C(C)C)CC)C)[C@]1(CC2)C)C
XGN00090	O[C@H]1CC[C@]2(C(CC[C@@]3(C2CC=C2C4CC(CC[C@@]4(CC[C@]23C)C(O)=O)(C)C)C)C1(C)C)C
XGN00091	OC1CCC2(C(CCC3(C2CCC2C3(CCC3C2(CCC3C(CO)=C)C)C)C)C1(C)C)C
XGN00092	O(C)c1c(OC)cc(cc1OC)[C@H](O)[C@H](Oc1c(OC)cc(cc1OC)CC=C)C
XGN00093	O1[C@@H]([C@H](C)[C@H](C)[C@@H]1c1cc(OC)c(OC)c(OC)c1)c1cc(OC)c(OC)c(OC)c1
XGN00094	O[C@H]1CC[C@@]23[C@@H](CC[C@@H]4[C@]2(CC[C@@]2(C)[C@]4(CC[C@@H]2[C@@H](CCC(C(C)C)=C)C)C)C3)[C@@H]1C
XGN00095	OC(=O)CCCCCCCCCCCCCCCCCCC
XGN00096	O1c2c(C=CC1=O)c(OC)cc(OC)c2
XGN00097	O[C@@H]1CC2=CC[C@H]3[C@@H]4CC[C@H]([C@@H](CC[C@H](C(C)C)CC)C)[C@]4(CC[C@@H]3[C@]2(CC1)C)C
XGS00037	O(C)c1cccc(OC)c1\C=C\C=1NC(=O)C=C(O)C=1
XGS00038	O(C)c1cc(OC)cc(OC)c1\C=C\C=1NC(=O)C=C(O)C=1
XGN00142	Oc1cc(cc(O)c1C(C)C)\C=C\c1ccccc1
XOS00002	P(OCc1ccc([N+](=O)[O-])cc1)(OCc1ccc([N+](=O)[O-])cc1)(=O)[O-]
XOS00003	Brc1ccc(cc1)CN(S(=O)(=O)c1ccc(Cl)cc1)CC(=O)N1CCCCC1
XOS00004	S(=O)(=O)(c1nc(oc1N1CCOCC1)-c1cc(OC)c(OC)c(OC)c1)c1ccc(cc1)C
XOS00005	O(C)c1ccccc1NC(=O)C=1[C@@H](C2=C(NC=1C)CC(CC2=O)(C)C)c1cc(OC)c(O)cc1
XOS00006	S(Oc1c(OC)cc(cc1OC)C(=S)N1CCOCC1)(=O)(=O)c1ccc(OC)cc1
XOS00007	Fc1ccc(N2[C@@H](C(C(=O)c3ccccc3)=C(O)C2=O)c2ccc(OC)cc2OC)cc1
XOS00008	S1c2n(N=C1c1ccncc1)c(nn2)-c1cc(OC)c(OC)c(OC)c1
XOS00009	O(C)c1c(OC)cc(cc1OC)[C@@H](Nc1nc(ccc1)C)c1ccc2c(nc(cc2)C)c1O
XOS00010	s1c2c([n+](CCCS(=O)(=O)[O-])c1\C=C(\OCC)/C)c1c(cc2)cccc1
XOS00011	O1CCOc2c1cc(cc2)C(=O)C=1[C@H](N(CCCn2ccnc2)C(=O)C=1O)c1cc(O)ccc1
XOS00012	S(=O)(=O)(N(CC(=O)N\N=C/1\CCCC\1)c1cc(cc(c1)C)C)c1cc(OC)c(OC)cc1
XOS00013	S(=O)(=O)(N1N=C(C[C@H]1c1ccccc1OC)c1ccc(cc1)C)c1ccccc1
XOS00014	S(=O)(=O)(N(CC(=O)Nc1cc(F)ccc1)C1CCCCC1)c1ccc(cc1)C
XOS00015	S(Oc1ccc(cc1)C(c1c(n[nH]c1O)C)c1c(n[nH]c1O)C)(=O)(=O)c1ccc(F)cc1
XOS00016	O(C)c1cc(cc(OC)c1O)[C@@H]1Nc2c(C3=C1C(=O)CC(C3)(C)C)c1c(nccc1)cc2
XOS00017	Clc1ccc(S(Oc2cc(ccc2OC)C(=S)N2CCOCC2)(=O)=O)cc1
XOS00018	S(=O)(=O)(N1CCN(CC1)c1cccc(C)c1C)c1cc(OC)c(OC)cc1
XOS00019	O1c2[nH]nc(c2[C@H](C(C#N)=C1N)c1cc([N+](=O)[O-])c(O)c(OC)c1)CCC
XOS00020	Brc1cc(ccc1)-c1n2N=C(Sc2nn1)c1cc(OC)c(OC)c(OC)c1
XOS00021	Clc1cc(NC(=O)C[C@H](NC[C@H](CCCC)CC)C(O)=O)c(OC)cc1
XOS00022	Clc1ccc(N2C3=C([C@H](C(C#N)=C2N)c2cc(OC)c(OC)cc2)C(=O)CCC3)cc1
XOS00023	O1c2cc(ccc2OC1)[C@@H]1Nc2c(C3=C1C(=O)CC(C3)(C)C)c1c(nccc1)cc2
XOS00024	O1CCC[C@H]1CN[C@@H](CC(=O)Nc1cc(O)ccc1)C(O)=O
XOS00025	S1c2n(N=C1c1ncccc1)c(nn2)-c1cc(OC)c(OC)c(OC)c1
XOS00026	s1c2nc(N3CCOCC3)c3CCCCc3c2c(N)c1C(=O)N
XOS00027	Brc1c2OC(=O)C(=Cc2c2c3CCCCc3oc2c1)C(O)=O
XOS00028	o1c2c(c(C(OCC)=O)c1C)c(CN1CCCCC1)c(O)c1c2cccc1
XOS00029	o1c2c(c(C(OCC)=O)c1C)c(CN1CCN(CC1)C(OCC)=O)c(O)c1c2cccc1
XOS00030	Oc1c2c(c3n(CCO)c(C)c(c3c1)C(OCC)=O)cccc2
XOS00031	Brc1cc-2c(cc1)C(=O)C(=O)c1[nH]c(C)c(c1-2)C(OCC)=O
XOS00032	o1cc(c2c1-c1c(cccc1)C(=O)C2=O)C(=O)c1ccc(OC)cc1
XOS00033	O1C(=Cc2c(cccc2)C1=O)C(=O)NCc1occc1
XOS00034	O1C(=Cc2c(cccc2)C1=O)C(=O)Nc1cc(cc(c1)C(OC)=O)C(OC)=O
XOS00035	s1c2CC(CCc2c(C(=O)N)c1NC(=O)C=1OC(=O)c2c(C=1)cccc2)CC
XOS00036	s1c2c(nc1NC(=O)C=1OC(=O)c3c(C=1)cccc3)cccc2
XOS00037	O=C1C2C(C3CC[C@](OC(=O)C)(C(=O)COC(=O)C)C3(C1)C)CCC1=CC(=O)C=CC12C
XOS00038	s1c2c(CCCC2)c(C(OCC)=O)c1NC(=O)C=1OC(=O)c2c(C=1)cccc2
XOS00039	s1c2CC(CCc2c(C(=O)N)c1NC(=O)C=1OC(=O)c2c(C=1)cccc2)C(C)(C)C
XOS00040	s1c2CC(CCc2c(C(OC(C)C)=O)c1NC(=O)C=1OC(=O)c2c(C=1)cccc2)C
XOS00041	s1ccc(NC(=O)C=2OC(=O)c3c(C=2)cccc3)c1C(OC)=O
XOS00042	s1c(C(OC(C)C)=O)c(C)c(C(OC(C)C)=O)c1NC(=O)C=1OC(=O)c2c(C=1)cccc2
XOS00043	Clc1cc2c(OC(=O)C(C(=O)Nc3sccn3)=C2O)cc1
XOS00044	s1c(C(OCC)=O)c(nc1NC(=O)C1=Cc2c(OC1=O)cccc2)C
XOS00045	s1c(C(OCC)=O)c(nc1NC(=O)/C(=N\Nc1ccccc1C(O)=O)/C(=O)C)C
XOS00046	s1ccnc1NC(=O)C=1C(=O)N(c2c(cccc2)C=1O)CCC
XOS00047	s1ccnc1N1C(=O)c2c(ccc(c2)C(O)=O)C1=O
XOS00048	s1c(cnc1NC(=O)c1cc2OCOc2cc1)C
XOS00049	s1ccnc1NC(=O)CSc1ccccc1C(OC)=O
XOS00050	s1c2CCCCc2nc1NC(=O)c1c(OC)cccc1OC
XOS00051	Clc1cc(C(=O)Nc2sc3c(n2)CC(CC3=O)(C)C)c(OC)cc1
XOS00052	s1ccnc1NC(=O)C1CC(=O)N(C1)c1ccccc1OCC
XOS00053	s1ccnc1NC(=O)c1cc2OCOc2cc1
XOS00054	s1c(C)c(nc1NC(=O)c1ccc(OC)cc1OC)-c1ccccc1
XOS00055	s1c(C(=O)C)c(nc1NC(=O)c1c(OC)cccc1OC)C
XOS00056	s1cc(nc1NC(=O)c1oc(cc1)C)-c1ccc(cc1)C
XOS00057	s1ccnc1NC(=O)c1cc(OCC)c(OCC)c(OCC)c1
XOS00058	s1c(C)c(nc1NC(=O)C1CCCCC1C(O)=O)-c1ccccc1
XOS00059	s1c(C(OCC)=O)c(nc1NC(=O)\C=C\c1cc2OCOc2cc1)C
XOS00060	s1cc(nc1NC(=O)C)C1=Cc2c(OC1=O)c(OC)ccc2
XOS00061	s1c(C(=O)N(C)C)c(nc1NC(=O)c1ccccc1OCC)C
XOS00062	s1cc(nc1NC(=O)C1CCCCC1C(O)=O)-c1ccc(OC)cc1
XOS00063	s1c(C)c(nc1NC(=O)\C=C\c1cc2OCOc2cc1)C
XOS00064	s1ccnc1NC(=O)c1ccccc1OC(C)C
XOS00065	Clc1cc2C=C(C(=O)Nc3sccn3)C(Oc2cc1)=O
XOS00066	s1ccnc1NC(=O)c1ccccc1C(O)=O
XOS00067	s1ccnc1NC(=O)c1cc2c(cc1)C(=O)N(CCC)C2=O
XOS00068	s1ccnc1NC(=O)CN1C=Nc2c(cccc2)C1=O
XOS00069	s1c2CCCCc2nc1NC(=O)c1ccccc1C(O)=O
XGS00039	O(C)c1cc(nc(O)c1)\C=C\c1ccccc1
XGS00040	Oc1nc(cc(N)c1)\C=C\c1ccccc1
XGS00041	O(C)c1ccccc1\C=C\c1nc(O)cc(OC)c1
XGS00042	O(C)c1cc(nc(O)c1)\C=C\c1cc(OC)ccc1
XGS00043	O(C)c1cc(ccc1)\C=C\c1nc(O)cc(N)c1
XGS00044	Clc1cc(ccc1)\C=C\c1nc(O)cc(OC)c1
XGS00045	Clc1ccc(cc1)\C=C\c1nc(O)cc(OC)c1
XGS00046	Clc1ccc(cc1)\C=C\c1nc(O)cc(N)c1
XGS00047	o1c(ccc1\C=C\c1nc(O)cc(N)c1)C
XGS00048	o1cccc1\C=C\c1nc(O)cc(N)c1
XGS00049	O(C)c1ccccc1\C=C\c1nc(O)cc(N)c1
XGS00050	O(C)c1cc(nc(O)c1)\C=C\c1ccc(OC)cc1
XGS00051	O(C)c1ccc(cc1)\C=C\c1nc(O)cc(N)c1
XGS00052	Clc1ccccc1\C=C\c1nc(O)cc(OC)c1
XGS00053	Clc1ccccc1\C=C\c1nc(O)cc(N)c1
XGS00054	Clc1cc(ccc1)\C=C\c1nc(O)cc(N)c1
XGS00055	s1cccc1\C=C\c1nc(O)cc(N)c1
XON00001	o1c2cc(O)c(cc2cc1-c1cc(O)cc(O)c1)C\C=C(\C)/C
XOS00070	O1CCN(\N=C\c2oc([N+](=O)[O-])cc2)C1=O
XOS00071	Oc1cc(ccc1O)\C=C\C(O[C@@H]1C[C@@](O)(C[C@@H](O)[C@H]1O)C(O)=O)=O
XGS00056	Clc1ccccc1\C=C\C=1NC(=O)C=C(O)C=1
XOS00072	OC12CC(O)CCC1(C1C(C3CCC(C(CCCC(CO)C)C)C3(CC1)C)CC2O)C
XOS00073	OC12CC(O)CCC1(C1C(C3CCC(C(CCC(O)C(C)C)C)C3(CC1)C)CC2O)C
XOS00074	O1CC(COC12CC1C(C2C)C2(C(C3C(CC2)C2(CCC(O)CC2(O)C(O)C3)C)C1)C)C
XOS00075	OC12CC(O)CCC1(C1C(C3CC\C(=C/C=C/4\CCC5C6C(CCC\45C)C4(CCC(O)CC4(O)C(O)C6)C)\C3(CC1)C)CC2O)C
XOS00076	OC1C2CC(O)CCC2(C2C(C3CCC(C(CCC(=O)C(C)C)C)C3(CC2)C)C1)C
XOS00077	OC12CC(O)CCC1(C1C(C3CCC(C(CCC(=O)C(C)C)C)C3(CC1)C)CC2=O)C
XOS00078	OC1CC2=CCC3C4CCC(C(CCC(=O)C(C)C)C)C4(CCC3C2(CC1)C)C
XOS00079	O(C(=O)C)C1CC2=CCC3C4CCC(C(CCC(=O)C(C)C)C)C4(CCC3C2(CC1)C)C
XOS00080	O(C(=O)C)C1C2CC(OC(=O)C)CCC2(C2C(C3CCC(C(CCC(=O)C(C)C)C)C3(CC2)C)C1)C
XOS00081	OC1C2CC(O)CCC2(C2C(C3CCC(C(CCC(C(C)C)=C)C)C3(CC2)C)C1)C
XOS00082	OC1CC2=CCC3C4CCC(C(CC/C(=C/C)/C(C)C)C)C4(CCC3C2(CC1)C)C
XOS00083	O(C(=O)C)C1CC2=CCC3C4CCC(C(CC/C(=C/C)/C(C)C)C)C4(CCC3C2(CC1)C)C
XOS00084	OC1CC2=CCC3C4CCC(C(CCCC(C)C)C)C4(CCC3C2(CC1)CO)C
XOS00085	O1CC(COC12CC1C(C2C)C2(C(C3C(CC2)C2(C[C@H](O)[C@@H](O)CC2CC3)C)C1)C)C
XOS00086	OC1CC2CCC3C4CC(=O)C(C(C(=O)CCC(CO)C)C)C4(CCC3C2(CC1)C)C
XOS00087	OC1CC2C3C(CCC2(C)C1C(CCCC(CO)C)C)C1(C(CC3)CC=CC1)C
XOS00088	OC1CC2C3C(CCC2(C)C1C(CCCC(CO)C)C)C1(C(CC(O)CC1)=CC3)C
XOS00089	O[C@H]1CC2(C(C[C@@H]1O)CCC1C3CCC(C(CCCC(CO)C)C)C3(CCC12)C)C
XOS00090	OC1CC2=CCC3C4CCC(C(CCCC(CO)C)C)C4(CCC3C2(CC1)C)C
XOS00091	O=C1CC2C3C(CCC2(C)C1C(C(=O)CCC(CO)C)C)C1(C(C[C@H](O)CC1)CC3)C
KDPT	OC(C(NC(=O)C1CCN(C1)C(=O)C(N)CCCCN)C(O)=O)C
XOS00092	OC12CC3(NCC(=O)N4CCC[C@H]4C#N)CC(C1)CC(C3)C2
XOS00093	N(C(NC(N)=N)=N)(C)C
XOS00094	F[C@@]12[C@H]([C@@H]3CC[C@](OC(=O)CCC)(C(=O)COC(=O)C)[C@]3(C[C@@H]1O)C)C[C@H](F)C1=CC(=O)C=C[C@@]12C
XOS00095	O=C1CC[C@@]2([C@@H]3[C@H]([C@@H]4CC[C@H](C(=O)C)[C@]4(C[C@@H]3O)C)C[C@@H](C2=C1)C)C
XOS00096	S1CCN(CC1)C(=[NH2+])NC(=[NH2+])N
XOS00097	S(C(F)F)c1ccc(NC(=[NH2+])NC(=[NH2+])N)cc1
XOS00098	O=C(N[C@@H](CCCNC(=[NH2+])N)C(=O)N)c1ccccc1
XOS00099	O1c2cc(ccc2OC1)\C=N\N\C(=N/[N+](=O)[O-])\N
XOS00100	S(=O)(=O)(NC(N)=N)c1ccc(NC(=O)c2ccccc2C(=O)[O-])cc1
XOS00101	O(C)c1ccc(cc1[N+](=O)[O-])\C=N/[N-]C(=[NH2+])N
XOS00102	O=C/1Nc2c(cc(cc2)C)\C\1=N\NC(N)=N
XOS00103	O(C)c1cc2nc(nc(c2cc1)C)NC(=[NH2+])N
XOS00104	S(=O)(=O)(NC(N)=N)c1ccc(NC(=S)Nc2ccccc2)cc1
XOS00105	O(C)c1ccccc1NC(=[NH2+])NC(=[NH2+])N
XOS00106	Clc1cc(ccc1C)-c1oc(cc1)\C=N/N\C(=N\[N+](=O)[O-])\N
XOS00107	[NH+](/N=C/c1ccc(cc1)\C=N\[NH+]=C(\N)/N)=C(\N)/N
XOS00108	Clc1ccc(cc1NC(=[NH2+])NC(=[NH2+])N)C(F)(F)F
XOS00109	O1c2c(cccc2[N+](=O)[O-])/C(=N/[N-]C(=[NH2+])N)/CC1
XOS00110	O1CC\C(=N/[N-]C(=[NH2+])N)\c2cc(OC)ccc12
XOS00111	O(C\C=N\N\C(=N\O)\N)c1ccc(OC)cc1
XOS00112	S(=O)(=O)(NC(N)=N)c1ccc(\N=C\c2cc(O)c(OC)cc2)cc1
XOS00113	S(=O)(=O)(NC(N)=N)c1ccc(NC(=S)NC(=O)CC(C)C)cc1
XOS00114	S(=O)(=O)(NC(N)=N)c1ccc(NC(=S)NC(=O)C(C)C)cc1
XOS00115	S(=O)(=O)(N[N-]C(=[NH2+])N)c1ccc(N=Nc2c(n[nH]c2N)N)cc1
XOS00116	Brc1ccc(cc1)Cn1cc(c2c1cccc2)\C=N/N\C(=N/[N+](=O)[O-])\N
XOS00117	o1c(ccc1\C=N\N\C(=N/[N+](=O)[O-])\N)-c1ccc(-n2nnnc2)cc1
XOS00118	O(c1cc(ccc1)\C=N\N\C(=N\[N+](=O)[O-])\N)c1nc2N(C)C(=O)N(C)C(=O)c2n1C
XOS00119	[NH2+]=C(NC(=[NH2+])N)N1CCCc2c1cccc2
XOS00120	Clc1ccccc1C[C@@H]1S\C(\NC1=O)=N\C(N)=N
XOS00121	O(CC)c1cc(ccc1OCC)\C=N\NC(N)=N
XOS00122	O1c2c(OC[C@H]1C(=O)NNC(N)=N)cccc2
XGN00098	O1c2cc(ccc2OC1)C=1N(c2c(cccc2)C(=O)C=1)C
XGN00099	O(C)c1c(O)c2c(N(c3c(cccc3)C2=O)C)cc1OC
XGN00100	O1c2c(CC(O)C1(C)C)c(O)cc1OC(=O)C=Cc12
XGN00101	o1c2nc3c(cc(OC)c(OC)c3)c(OC)c2cc1
XGN00102	O1c2cc(OC)c(O)cc2C=CC1=O
XGN00103	O1c2c(cc(O)cc2)C=CC1=O
XGN00104	O(C(COC(=O)CCCCCCC\C=C\C\C=C\CCCCC)CO)C(=O)CCCCCCC\C=C\C\C=C\CCCCC
XGN00105	O(C(=O)C(O)CO)CCCCCCC\C=C\C\C=C\CCCCC
XGN00106	O1c2cc(ccc2OC1)-c1nc2c(cccc2)c(OC)c1
XGN00107	O1c2c(C=CC1=O)cc1c(occ1)c2OC
XGN00108	O1c2cc(OC\C=C(\C)/C)ccc2C=CC1=O
XGN00109	OC\C=C(\CCCC(CCCC(CCCC(C)C)C)C)/C
XGN00110	O1c2cc(ccc2OC1)CCCCCCC(=O)C
XGN00111	O(CCCCCCCCCCCCCC(C)C)C\C=C(\CCC[C@H](CCC[C@@H](CCCC(C)C)C)C)/C
XGN00112	O1c2cc(ccc2OC1)CCC(=O)C
XGN00113	o1c2nc3c(cccc3OC)c(OC)c2cc1
XGN00114	O1CC1(CO)C1Oc2cc(O)c3c(N(c4c(cccc4)C3=O)C)c2C1
XOS00123	O1CCN(CC1)c1nc(nc(N\N=C\c2cc([N+](=O)[O-])c3OCOc3c2)c1)N1CCOCC1
XOS00124	S1\C(=C\c2cc(OC)c(Oc3nc(nc(n3)N3CCOCC3)N3CCOCC3)cc2)\C(=O)N(C)C1=S
XOS00125	O=C1N2C(Nc3cc(ccc23)C)=C(C#N)C(C)=C1\C=N\c1ccc(NC(=O)C)cc1
XOS00126	S(=O)(=O)(Nc1nc(OC)nc(OC)c1)c1ccc(N\C=C/2\C(=O)N(c3ccccc3)C(=O)NC\2=O)cc1
XOS00127	Clc1cc(Cl)ccc1Cn1cc(c2c1cccc2)\C=N\Nc1nc(nc(n1)N1CCOCC1)N1CCOCC1
XOS00128	O1CCN(CC1)c1nc(nc(n1)N\N=C\c1cc([N+](=O)[O-])c(O)cc1)N1CCOCC1
XOS00129	s1c2nc(nc(N3CCOCC3)c2c(C)c1C(OC)=O)-c1ccccc1
XOS00130	s1c2cc(S(=O)(=O)C)ccc2nc1NC(=O)Nc1ccc(cc1)C
XOS00131	Clc1ccc(NC(=O)Nc2ccc(S(=O)(=O)Nc3onc(C)c3C)cc2)cc1
XOS00132	s1c(NC(=O)Nc2ccc(cc2)C(=O)C)c(nc1NS(=O)(=O)c1ccccc1)C
XOS00133	s1c2cc(Nc3nc(nc(n3)N3CCOCC3)N3CCOCC3)ccc2nc1SCC(OCC)=O
XOS00134	s1c2cc(OCC)ccc2nc1NS(=O)(=O)c1ccc(NC(=O)C)cc1
XOS00135	O1CCN(CC1)c1cc(Nc2cc3OCOc3cc2)c([N+](=O)[O-])c2nonc12
XOS00136	Clc1cc(ccc1OC)C(=O)NC(=S)Nc1ccc(NC(=S)\N=C(/O)\C)cc1
XOS00137	S(CC(=O)Nc1ccccc1C)c1nc(N)cc(n1)N
XOS00138	S(Cc1nc2c(n1C)cccc2)c1[nH]c2c(n1)ncnc2N
XOS00139	n12nc(N)c(N=Nc3ccccc3)c1N=CC(C#N)=C2N
XOS00140	O=C1n2nc(N)c(N=Nc3ccccc3)c2NC(=C1)C
XOS00141	O=[N+]([O-])c1c[nH]nc1C=1C=Nc2nc(nn2C=1)N
XOS00142	Fc1ccccc1Oc1ncnc(-n2ncc(C(OC)=O)c2N)c1
XOS00143	Clc1cc(Cl)ccc1C(=O)c1sc(N2CCOCC2)c(c1)-c1ccc(S(=O)(=O)C)cc1
XOS00144	S=C(Nc1cc2nc(oc2cc1)-c1cccnc1)NC(=O)c1occc1
XOS00145	O(C)c1ccc(NC(=O)C=2[C@H](n3nc(nc3NC=2C)-c2ccccc2)c2ccncc2)cc1
XOS00146	O1CCN(CC1)c1ccc(cc1NC(=O)c1cc2OCCOc2cc1)C(OC)=O
XOS00147	S(CC(=O)c1ccc(NC(=O)C)cc1)c1nnc(n1-c1ccccc1)-c1ccncc1
XOS00148	O(C)c1cc(N=Nc2c3n(nc2N)C(N)=C(C=N3)C#N)ccc1
XOS00149	O(CC)c1ccc(N=Nc2c3n(nc2N)C(N)=C(C=N3)C(OCC)=O)cc1
XOS00150	O1c2c(ccc(OCC(=O)N3CCC(CC3)C(=O)N)c2)C(C)=C(C)C1=O
XOS00151	Clc1ccc(cc1)-c1n2N=C(Sc2nn1)c1nccnc1
XOS00152	s1cccc1-c1oc(SC=2n3ncnc3N=C(C=2)c2ccccc2)nn1
XOS00153	S1c2n(N=C1c1nccnc1)c(nn2)-c1occc1
XOS00154	O(C)c1cc(ccc1)-c1nn2c(N=C(C(C#N)=C2N)c2cccnc2)c1
XOS00155	S(Cc1cccnc1)c1nc(N)cc(n1)N
XOS00156	Clc1ccccc1\C=N\n1c(nnc1SCC(=O)NN)-c1ccncc1
XOS00157	S(C)c1nc(NNC=O)cc(Oc2ccc(NC(=O)C)cc2)n1
XOS00158	[nH]1nc(N)c2c1-n1nc(N)c(N=Nc3ccccc3)c1N=C2N
XOS00159	s1c2ncnc(N\N=C\3/c4c(NC/3=O)cccc4)c2c(C)c1C
XOS00160	Brc1cc2C=C(C(=O)N3C[C@H](O[C@@H](C3)C)C)C(Oc2cc1)=O
XOS00161	Clc1ccccc1-c1noc(C)c1C(=O)N\N=C(/C)\c1cc(NC(=O)C)ccc1
XOS00162	Clc1ccccc1Cn1nc(NS(=O)(=O)c2ccc(NC(=O)C)cc2)cc1
XGS00057	Fc1ccccc1CCOC(=O)\C=C\C=1OC(=O)C=C(OC)C=1
XGS00058	Brc1ccccc1CCOC(=O)\C=C\C=1OC(=O)C=C(OC)C=1
XGS00059	Clc1cccc(Cl)c1CCOC(=O)\C=C\C=1OC(=O)C=C(OC)C=1
XGS00060	O1C(=CC(OC)=CC1=O)\C=C\C(OCCc1ccccc1OC)=O
XGS00061	FC(F)(F)c1ccccc1CCOC(=O)\C=C\C=1OC(=O)C=C(OC)C=1
XGS00062	O1C(=CC(OC)=CC1=O)\C=C\C(OCCc1ccccc1[N+](=O)[O-])=O
XGS00063	O1C(=CC(OC)=CC1=O)\C=C\C(OCCc1ccc(cc1C)C)=O
XGS00064	O1C(=CC(OC)=CC1=O)\C=C\C(OCCc1c(cc(cc1C)C)C)=O
XGS00065	O1C(=CC(OC)=CC1=O)\C=C\C(OCCc1c2c(ccc1)cccc2)=O
XGN00115	OC\C=C(\CCCC(CCCC(CCCCC)C)C)/C
XGN00116	O(C(=O)CCCCCC\C=C\C\C=C\CCCCC)CC(O)CO
XGN00117	O1c2c(C=C(C(C=C)(C)C)C1=O)cc1CC(Oc1c2)C(O)(C)C
XGN00118	O1CC(=CC1=O)\C=C\C1(C2CCC=C(C)C2(C)C(OC(=O)C)C(OC(=O)C(C)C)C1(O)C)C
XGN00119	O1C2(C)C(OC(=O)C)C(OC(=O)C)C3(C(C2(CCC12CC(OC2)=O)C)C(OC(=O)c1ccccc1)CC=C3C)C
XGN00120	O1C2(C)C(C3CCC=C(C)C3(C)C(OC(=O)c3ccccc3)C2O)(C)C(OC(=O)c2ccccc2)CC12COC(=O)C2O
XGN00121	O1C2(C)C(C3CCC=C(C)C3(C)C(OC(=O)c3ccccc3)C2O)(C)C(OC(=O)c2ccccc2)CC12CC(OC2)=O
XGN00122	O1CC(=CC1=O)CC(OC(=O)C)C1(C2CCC=C(C)C2(C)C(OC(=O)c2ccccc2)C(O)C1(O)C)C
XGN00123	O1CC(=CC1=O)\C=C\C1(C2CCC=C(C)C2(C)C(OC(=O)c2ccccc2)C(O)C1(O)C)C
XGN00124	O1CC(=CC1=O)\C=C\C1(C2CCC=C(C)C2(C)C(OC(=O)c2cccnc2)C(OC(=O)C(C)C)C1(O)C)C
XGN00125	O1CC(=CC1=O)\C=C\C1(C2CCC=C(C)C2(C)C(OC(=O)c2ccccc2)C(OC(=O)c2cccnc2)C1(O)C)C
XGN00126	O1CC(=CC1=O)\C=C\C1(C2CCC=C(C)C2(C)C(OC(=O)c2ccccc2)C(OC(=O)c2ccccc2)C1(O)C)C
XGN00127	O1CC(=CC1=O)\C=C\C1(C2CCC=C(C)C2(C)C(OC(=O)c2ccccc2)C(OC(=O)C(C)C)C1(O)C)C
XGN00128	O1CC(=CC1=O)CC(OC(=O)C)C1(C2CCC=C(C)C2(C)C(OC(=O)C(C)C)C(OC(=O)C)C1(O)C)C
XGN00129	O1CC(=CC1=O)\C=C\C1(C2CCC=C(C)C2(C)C(OC(=O)c2ccccc2)C(OC(=O)C(OC(=O)C)C(C)C)C1(O)C)C
XGN00130	O1CC(=CC1=O)\C=C\C1(C2CCC=C(C)C2(C)C(OC(=O)C)C(OC(=O)C)C1(O)C)C
XGN00131	O1CC(=CC1=O)CC(OC(=O)C)C1C2CCC=C(C)C2(C)C(OC(=O)C)C(OC(=O)C)C1(O)C
XGN00132	O1C2(C)C(OC(=O)C)C(OC(=O)C)C3(C(C2(CCC12CC(OC2)=O)C)C(OC(=O)c1cccnc1)CC=C3C)C
XGN00133	O1C2(C)C(OC(=O)C)C(OC(=O)c3cccnc3)C3(C(C2(CCC12CC(OC2)=O)C)C(CC=C3C)CC(=O)c1cccnc1)C
XGN00134	O1C2(C)C(C3CCC=C(C)C3(C)C(OC(=O)c3cccnc3)C2OC(=O)C)(C)C(OC(=O)c2cccnc2)CC12CC(OC2)=O
XGN00135	O1CC(=CC1=O)CC(OC(=O)C)C1(C2CCC=C(C)C2(C)C(OC(=O)c2cccnc2)C(OC(=O)C(C)C)C1(O)C)C
XGN00136	O1C2(C)C(C3CCC=C(C)C3(C)C(OC(=O)c3cccnc3)C2OC(=O)c2cccnc2)(C)C(OC(=O)c2ccccc2)CC12CC(OC2)=O
XGN00137	O1CC(=CC1=O)CC(OC(=O)C)C1(C2CCC=C(C)C2(C)C(OC(=O)c2cccnc2)C(OC(=O)c2cccnc2)C1(O)C)C
XGN00138	O1CC(=CC1=O)CC(OC(=O)C)C1(C2CCC=C(C)C2(C)C(OC(=O)c2ccccc2)C(OC(=O)c2ccccc2)C1(O)C)C
XGN00139	O1CC(=CC1=O)\C=C\C1(C2CCC=C(C)C2(C)C(OC(=O)c2cccnc2)C(OC(=O)C(OC(=O)C)C(C)C)C1(O)C)C
XGN00164	O1CC(=CC1=O)\C=C\C1(C2CCC=C(C)C2(C)C(CC(=O)c2ccccc2)C(OC(=O)C)C1(O)C)C
XGN00165	O1CC(=CC1=O)\C=C\C1(C2CCC=C(C)C2(C)C(OC(=O)c2cccnc2)C(OC(=O)c2cccnc2)C1(O)C)C
XGS00066	Clc1ccc(cc1)\C=C(\C(=O)N1CCN(CC1)c1ncccn1)/c1ccccc1
XGS00067	O(C)c1ccccc1\C=C(\C(=O)N1CCN(CC1)c1ncccn1)/c1ccccc1
XGS00068	Clc1cc(ccc1)\C=C(\C(=O)N1CCN(CC1)c1ncccn1)/c1ccccc1
XGS00069	Clc1ccccc1\C=C(\C(=O)N1CCN(CC1)c1ncccn1)/c1ccccc1
XGS00070	Oc1ccccc1\C=C(\C(=O)N1CCN(CC1)c1ncccn1)/c1ccccc1
XGS00071	O(C)c1cc(\C=C(\C(=O)N2CCN(CC2)c2ncccn2)/c2ccccc2)c(O)cc1
XGS00072	O=C(N1CCN(CC1)c1ncccn1)\C(=C\c1cc2[nH]ccc2cc1)\c1ccccc1
XGS00073	Fc1ccc(cc1)/C(=C\c1ccc(OC)cc1)/C(=O)N1CCN(CC1)c1ncccn1
XGS00074	Fc1ccc(cc1)/C(=C\c1ccccc1OC)/C(=O)N1CCN(CC1)c1ncccn1
XGS00075	Clc1ccc(cc1)\C=C(\C(=O)N1CCN(CC1)c1ncccn1)/c1ccc(F)cc1
XGS00076	Clc1cc(ccc1)\C=C(\C(=O)N1CCN(CC1)c1ncccn1)/c1ccc(F)cc1
XGS00077	Fc1ccc(cc1)/C(=C\c1cc(OC)ccc1O)/C(=O)N1CCN(CC1)c1ncccn1
XGS00078	Clc1cc(ccc1)\C=C(\C(=O)N1CCN(CC1)c1ncccn1)/c1cc(ccc1)C(F)(F)F
XGS00079	Clc1ccccc1\C=C(\C(=O)N1CCN(CC1)c1ncccn1)/c1cc(ccc1)C(F)(F)F
XGS00080	FC(F)(F)c1cc(ccc1)/C(=C\c1cc(OC)ccc1O)/C(=O)N1CCN(CC1)c1ncccn1
XGS00081	Clc1ccccc1\C=C(\C(=O)N1CCN(CC1)c1ncccn1)/c1ccc(F)cc1
XGS00082	FC(F)(F)c1cc(ccc1)/C(=C\c1cc2[nH]ccc2cc1)/C(=O)N1CCN(CC1)c1ncccn1
XGS00083	FC(F)(F)c1cc(ccc1)/C(=C\c1ccccc1)/C(=O)N1CCN(CC1)c1ncccn1
XGS00084	O=C(N1CCN(CC1)c1ncccn1)\C(=C\c1ccccc1)\c1ccccc1
XGS00085	FC(F)(F)c1ccc(cc1)\C=C(\C(=O)N1CCN(CC1)c1ncccn1)/c1ccccc1
XGS00086	Fc1ccc(cc1)\C=C(\C(=O)N1CCN(CC1)c1ncccn1)/c1cc(ccc1)C(F)(F)F
XGS00087	FC(F)(F)c1cc(ccc1)/C(=C\c1ccc(cc1)C(F)(F)F)/C(=O)N1CCN(CC1)c1ncccn1
XGS00088	Fc1ccc(cc1)/C(=C\c1ccc(F)cc1)/C(=O)N1CCN(CC1)c1ncccn1
XGS00089	Fc1ccc(cc1)/C(=C\c1ccc(cc1)C(F)(F)F)/C(=O)N1CCN(CC1)c1ncccn1
XGS00090	Fc1ccc(cc1)/C(=C\c1cc2[nH]ccc2cc1)/C(=O)N1CCN(CC1)c1ncccn1
XGS00091	Fc1ccc(cc1)/C(=C\c1ccccc1)/C(=O)N1CCN(CC1)c1ncccn1
XGS00092	Fc1ccc(cc1)/C(=C/C=C\c1ccccc1)/C(=O)N1CCN(CC1)c1ncccn1
XGS00093	FC(F)(F)c1cc(ccc1)/C(=C\c1ccc(OC)cc1)/C(=O)N1CCN(CC1)c1ncccn1
XGS00094	FC(F)(F)c1cc(ccc1)/C(=C\c1ccccc1OC)/C(=O)N1CCN(CC1)c1ncccn1
XGS00095	Clc1ccc(cc1)\C=C(\C(=O)N1CCN(CC1)c1ncccn1)/c1cc(ccc1)C(F)(F)F
XGS00096	FC(F)(F)c1cc(ccc1)/C(=C\C=C\c1ccccc1)/C(=O)N1CCN(CC1)c1ncccn1
XGS00097	O(C)c1ccc(cc1)\C=C(\C(=O)N1CCN(CC1)c1ncccn1)/c1ccccc1
XGS00098	O1c2cc(O)c3c(OC=C(C3=O)c3ccc(OC)cc3)c2[C@H](CC1=O)c1ccc(OCC(=O)N)cc1
XGS00099	Clc1cc(c2OCOCc2c1)\C=C\1/Oc2c(ccc(O)c2C[NH+]2CC[NH+](CC2)CCO)C/1=O
XGS00100	O1c2c(cc3OCOc3c2)C(=CC1=O)c1oc2c(c1)c(cnc2C)C[NH2+]CCOC
XGS00101	O1C=C(Oc2ccc(cc2)C(OCCC)=O)C(=O)c2c1c(C[NH+]1CCN(CC1)CCO)c(O)cc2
XGS00102	O1[C@H]2C=C[C@]13[C@@H]([C@H]2C(=O)NCc1cccnc1)C(=O)N(C3)c1ccc(NC(=O)C)cc1
XGS00103	O(c1c(n[nH]c1C)-c1ccc(OCC(=O)NN)cc1O)c1ccc(OC)cc1
XGS00104	O(CC)c1ccc(cc1)\C=C\C(=O)c1cc(NC(=O)C)ccc1O
XGS00105	O1c2c(c(cc3OC(=O)C4=C(CCCC4)c23)C)C(=O)CC1c1cc(OC)c(O)cc1
XGS00106	O1c2c(ccc(O)c2)C(C)=C(CC(=O)Nc2cc(NC(=O)C)ccc2)C1=O
XGS00107	Clc1ccccc1COc1ccc2c(O\C(=C/c3c4cc(OC)ccc4n(c3)CC)\C2=O)c1C
XGS00108	O1c2cc(ccc2OC1)-c1nc(cc2c1[nH]c1c2cccc1)C(=O)NCC(O)c1ccccc1
XGS00109	O\1c2c(ccc3OC[NH+](Cc23)CCN2CCOCC2)C(=O)/C/1=C/c1cc(OC)c(OC)cc1OC
XGS00110	O1C=C(C(=O)c2c1c(C[NH+]1CCN(CC1)Cc1cc3OCOc3cc1)c(O)cc2)c1ccc(OC)cc1
XGS00111	S(CC(=O)Nc1ccc(OCC)cc1)c1nnc(n1Cc1ccccc1)CNc1ccc(F)cc1
XGS00112	Fc1ccc(cc1)[C@@H]1Nc2n(nc(c2)C(=O)Nc2cc(ccc2)[C@H](O)C)[C@H](C1)C(F)(F)F
XGS00113	Fc1cc(ccc1)C(=O)Nc1cc(ccc1)/C(=N/NC(=O)c1c2c(ccc1)cccc2)/C
XGS00114	Clc1cccc(N2C(=O)/C(=C/c3c4c(n(c3)CC(=O)[O-])cccc4)/C(=O)[N-]C2=S)c1C
XGS00115	O(C(C)C)c1ccc(cc1)-c1nc2c(cccc2)c(c1)C(=O)N\N=C(/C)\c1ccc(NC(=O)C)cc1
XGS00116	S(CC(=O)Nc1ccc(F)cc1)c1nnc(n1-c1ccccc1OC)CNc1ccc(OC)cc1
XGS00117	Clc1cc(Cl)ccc1OC=1C(=O)c2c(OC=1C(F)(F)F)cc(OCC(=O)[O-])cc2
XGS00118	Fc1ccccc1N1CCN(CC1)C(=O)CCN1C(=O)c2c3c(cccc3ccc2)C1=O
XGS00119	Clc1ccc(N2C(=O)\C(=C\c3c4c(n(c3)CC(=O)[O-])cccc4)\C(=O)N(CC)C2=S)cc1
XGS00120	O1c2cc(ccc2OC1)-c1nc2c(cccc2)c(c1)C(=O)N1CCN(CC1)c1ccc([N+](=O)[O-])cc1
XGS00121	S(=O)(=O)(N(CC(=O)Nc1ccc(NC(=O)C)cc1)c1cc(ccc1)C(F)(F)F)c1ccccc1
XGS00122	Fc1cc(ccc1C(=O)[N-]\N=C\c1c2c(n(Cc3ccc([N+](=O)[O-])cc3)c1C)cccc2)C#N
XGS00123	Fc1ccc(NC(=O)Cn2cc(c3c2cccc3)\C=N\NC(=O)c2cc(ccc2)C(F)(F)F)cc1
XGS00124	Clc1cc(CNc2ccc(S(=O)(=O)N)cc2)c(OCc2ccc(F)cc2)cc1
XGS00125	Clc1cc(ccc1)C(=O)N[C@]1(C=2C(N(C1=O)c1ccc(cc1)C)=CC(CC=2[O-])(C)C)C(F)(F)F
XGS00126	Fc1cc(F)cc2c1[nH]cc2-c1nnnn1-c1cc2c(cc1)cccc2
XGS00127	S(=O)(=O)(N(C(=O)c1ccccc1)c1cc2c(oc(C)c2C(=O)C)cc1)c1ccc(F)cc1C
XGS00128	Fc1cc(ccc1)C(=O)Nc1n(ncc1C(=O)Nc1ccc(F)cc1)-c1ccccc1
XGS00129	Fc1ccc(cc1)C(=O)COC(=O)c1ccc(Oc2cccc(C#N)c2C#N)cc1
XGS00130	S(CC(=O)N)c1nnc(n1-c1cc(ccc1)C(F)(F)F)CNc1ccccc1
XGS00131	s1cccc1[C@@H]1Nc2n(ncc2C(=O)Nc2cc(ccc2)[C@@H](O)C)[C@H](C1)C(F)(F)F
XGS00132	Clc1ccccc1\C=N\Nc1nc(nc(n1)Nc1ccc(F)cc1)N1CCOCC1
XGS00133	Fc1ccccc1Cn1c2c([nH+]c1CNc1ccc(cc1)C(=O)[O-])cccc2
XGS00134	O=C1N(CCCCCC(=O)N(Cc2ccccc2)c2cc([N+](=O)[O-])ccc2)C(=O)c2c1cccc2
XGS00135	Clc1cc(F)ccc1OCc1oc(cc1)[C@@H]1C=2C(NC(C)=C1C(OCC)=O)=CC(CC=2O)(C)C
XGS00136	Clc1ccccc1\C=N\Nc1nc(nc(n1)Nc1cc(ccc1)C(F)(F)F)N1CCOCC1
XGS00137	S(=O)(=O)(N(CC(=O)Nc1ccc(NC(=O)C)cc1)c1ccc(cc1)C)c1ccc(F)cc1
XGS00138	Clc1cc(ccc1Cl)C(=O)Nc1ccccc1N1CCN(CC1)C(=O)CC
XGS00139	S(CC(=O)N1CCC(CC1)c1noc2c1cc(F)cc2)c1nc2c(cc1)cccc2
XGS00140	S1CC(=O)N([C@@H]1c1cc(Oc2ccccc2)ccc1)c1ccc(NC(=O)C)cc1
XGS00142	Oc1cc(cc(O)c1C(C)C)\C=C\c1ccccc1
XGS00143	Oc1cc(cc(O)c1C(C)C)\C=C\c1ccccc1O
XGS00144	Oc1cc(cc(O)c1C(C)C)\C=C\c1cc(O)ccc1
XGS00145	Oc1cc(cc(O)c1C(C)C)\C=C\c1ccc(O)cc1
XGS00146	Clc1ccccc1\C=C\c1cc(O)c(C(C)C)c(O)c1
XGS00147	Clc1cc(ccc1)\C=C\c1cc(O)c(C(C)C)c(O)c1
XGS00148	Clc1ccc(cc1)\C=C\c1cc(O)c(C(C)C)c(O)c1
XGS00149	Oc1cc(cc(O)c1C(C)C)\C=C\C1CCCCC1
XGS00150	Oc1cc(cc(O)c1C(C)C)\C=C\C=C\c1ccccc1
XGS00151	S1cccc1\C=C\c1cc(O)c(C(C)C)c(O)c1
XGS00152	Oc1cc(cc(O)c1C(C)C)\C=C\c1c2c(ccc1)cccc2
XGS00153	Oc1cc(cc(O)c1C(C)C)\C=C\c1ccccc1C
XGS00154	Oc1cc(cc(O)c1C(C)C)\C=C\c1cc(ccc1)C
XGS00155	Oc1cc(cc(O)c1C(C)C)\C=C\c1ccc(cc1)C
XGS00156	Clc1cc(ccc1)\C=C\c1cc(O)cc(O)c1
XGS00157	Clc1cc(ccc1)\C=C\c1cc(O)c(O)c(O)c1
XGS00158	Brc1c(O)cc(cc1O)\C=C\c1cc(Cl)ccc1
XGS00159	Clc1cc(ccc1)\C=C\c1cc(O)c(-c2ccccc2)c(O)c1
XGS00160	FC(F)(F)c1ccc(cc1)\C=C\c1cc(O)c(C(C)C)c(O)c1
XGN00141	O1C(=O)C(=CC1C\C(=C\COc1c2OC(=O)C=Cc2cc2c1occ2)\C)C
XGN00142	O1C(=O)C(=CC1C\C(=C\CCc1c2C=CC(Oc2cc2occc12)=O)\C)C
XGN00143	O=C(N(\C=C\c1ccccc1)C)\C=C\c1ccccc1
XGN00144	O(C)c1cc2c3cc(ccc3[nH]c2cc1)C=O
XGN00145	O=Cc1cc2c3c([nH]c2cc1)cccc3
XGN00146	O(C)c1cc2c3cc(C=O)c(O)cc3[nH]c2cc1
XGN00147	O1[C@@H]([C@H]1C(=O)N(\C=C\c1ccccc1)C)c1ccccc1
XGN00148	O=C(NC)\C=C\c1ccccc1
XGN00149	O1[C@H]2[C@H](C(C)C1=O)C(OC(=O)Cc1ccc(O)cc1)CC(=C1[C@@H]2C(=CC1=O)CO)C
XGN00150	O1[C@@H]2[C@@H]3C(=C(CC(OC(=O)Cc4ccc(O)cc4)C2C(=C)C1=O)C)C(=O)C=C3CO
XGN00151	O1[C@@H]2[C@@H]3[C@](CC[C@H]2[C@@H](C)C1=O)(C)[C@H](O)CC=C3C
XGN00152	O1[C@@H]2[C@@H]3[C@](CC[C@H]2C(=C)C1=O)(C)[C@H](O)CC=C3C
XGN00153	O1[C@H]2[C@@H]([C@@H](OC(=O)C)CC(=C3[C@@H]2C(=CC3=O)CO)C)C(C)C1=O
XGN00154	O1[C@@H]2[C@@H]3C(=C(CC[C@H]2[C@H](C)C1=O)C)C(=O)C=C3CO
XGN00155	O1[C@@H]2[C@@H]3[C@](CC[C@H]2[C@H](C)C1=O)(C)[C@H](O)CCC3=C
XGN00156	O1[C@H]2[C@@H]([C@@H](O)CC(=C3[C@@H]2C(=CC3=O)CO)C)C(C)C1=O
XGN00157	O1C[C@H]1[C@@H](O)c1cc(OC)c(-c2c(OC)cc(cc2OC)[C@@H](O)[C@@H]2OC2)c(OC)c1
XGN00158	Oc1cc(ccc1O)\C=C\C(OCC)=O
XGN00159	Oc1cc(ccc1O)\C=C/C(OCC)=O
XGN00160	O1c2c(C(=O)C=C1c1ccc(O)cc1O)c(O)cc(O)c2
XGN00161	OC(C(NC(=O)C(O)CCCCCCCCCCCCCCCCCCCCCC)CO)C(O)CCCCCCCCCCCCC
XGN00162	O1[C@@H](OCC(OC(=O)CCCCCCC\C=C\C\C=C\C\C=C\CC)COC(=O)CCCCCCC\C=C\C\C=C\C\C=C\CC)[C@@H](O)C(O)[C@H](O)C1CO
XGN00163	O(C(=O)CCCCCCC\C=C/C\C=C/CCCCC)CC(O)CO
