# Supplementary material for: Discovering new DNA gyrase inhibitors using machine learning approaches
Source: Royal Society of Chemistry journal article supplement (doi:10.1039/c5ra22568j), 2015-01-01
Supplement: c5ra22568j6.xlsx [file c5ra22568j6.xlsx]

## Sheet: sheet1
Descriptors	Training set											Test set
	TP	FN	TN	FP	SE	SP	Q+	Q-	C	AUC	Q	TP	FN	TN	FP	SE	SP	Q+	Q-	C	AUC	Q
MOE_36(MP)	58	4	37	4	0.935484	0.902439	0.935484	0.902439	0.837923	0.928	0.92233	21	1	7	5	0.954545	0.583333	0.807692	0.875	0.605975	0.909	0.823529
DS_15(MP)	53	9	36	5	0.854839	0.878049	0.913793	0.8	0.723277	0.846	0.864078	18	4	9	3	0.818182	0.75	0.857143	0.692308	0.558738	0.86	0.794118
ECFP4	57	5	38	3	0.919355	0.926829	0.95	0.883721	0.839929	0.926	0.92233	20	2	12	0	0.909091	1	1	0.857143	0.882735	0.992	0.941176
ECFP6	58	4	39	2	0.935484	0.95122	0.966667	0.906977	0.880149	0.923	0.941748	20	2	12	0	0.909091	1	1	0.857143	0.882735	0.989	0.941176
ECFP8	60	2	39	2	0.967742	0.95122	0.967742	0.95122	0.918961	0.92	0.961165	20	2	12	0	0.909091	1	1	0.857143	0.882735	0.989	0.941176
ECFP10	60	2	40	1	0.967742	0.97561	0.983607	0.952381	0.939662	0.919	0.970874	20	2	12	0	0.909091	1	1	0.857143	0.882735	0.989	0.941176
ECFP12	60	2	40	1	0.967742	0.97561	0.983607	0.952381	0.939662	0.919	0.970874	20	2	12	0	0.909091	1	1	0.857143	0.882735	0.989	0.941176
EPFP4	57	5	37	4	0.919355	0.902439	0.934426	0.880952	0.81858	0.893	0.912621	20	2	12	0	0.909091	1	1	0.857143	0.882735	0.989	0.941176
EPFP6	59	3	36	5	0.951613	0.878049	0.921875	0.923077	0.837272	0.909	0.92233	21	1	10	2	0.954545	0.833333	0.913043	0.909091	0.804824	0.985	0.911765
EPFP8	58	4	37	4	0.935484	0.902439	0.935484	0.902439	0.837923	0.914	0.92233	21	1	10	2	0.954545	0.833333	0.913043	0.909091	0.804824	0.992	0.911765
EPFP10	57	5	39	2	0.919355	0.95122	0.966102	0.886364	0.861472	0.916	0.932039	21	1	10	2	0.954545	0.833333	0.913043	0.909091	0.804824	0.992	0.911765
FCFP4	55	7	37	4	0.887097	0.902439	0.932203	0.840909	0.781281	0.926	0.893204	21	1	10	2	0.954545	0.833333	0.913043	0.909091	0.804824	0.981	0.911765
FCFP6	56	6	38	3	0.903226	0.926829	0.949153	0.863636	0.821377	0.918	0.912621	21	1	12	0	0.954545	1	1	0.923077	0.938679	0.992	0.970588
FCFP8	57	5	39	2	0.919355	0.95122	0.966102	0.886364	0.861472	0.914	0.932039	21	1	12	0	0.954545	1	1	0.923077	0.938679	0.992	0.970588
FCFP10	58	4	40	1	0.935484	0.97561	0.983051	0.909091	0.901568	0.911	0.951456	21	1	12	0	0.954545	1	1	0.923077	0.938679	0.992	0.970588
FCFP12	54	8	39	2	0.870968	0.95122	0.964286	0.829787	0.808008	0.937	0.902913	19	3	10	2	0.863636	0.833333	0.904762	0.769231	0.685385	0.871	0.852941
FPFP4	56	6	39	2	0.903226	0.95122	0.965517	0.866667	0.843241	0.889	0.92233	20	2	12	0	0.909091	1	1	0.857143	0.882735	0.973	0.941176
FPFP6	56	6	39	2	0.903226	0.95122	0.965517	0.866667	0.843241	0.907	0.92233	21	1	10	2	0.954545	0.833333	0.913043	0.909091	0.804824	0.977	0.911765
FPFP8	56	6	39	2	0.903226	0.95122	0.965517	0.866667	0.843241	0.914	0.92233	21	1	10	2	0.954545	0.833333	0.913043	0.909091	0.804824	0.981	0.911765
FPFP10	56	6	39	2	0.903226	0.95122	0.965517	0.866667	0.843241	0.911	0.92233	21	1	10	2	0.954545	0.833333	0.913043	0.909091	0.804824	0.981	0.911765
LCFP4	61	1	36	5	0.983871	0.878049	0.924242	0.972973	0.879391	0.921	0.941748	21	1	10	2	0.954545	0.833333	0.913043	0.909091	0.804824	0.985	0.911765
LCFP6	61	1	36	5	0.983871	0.878049	0.924242	0.972973	0.879391	0.919	0.941748	20	2	10	2	0.909091	0.833333	0.909091	0.833333	0.742424	0.985	0.882353
LCFP8	61	1	36	5	0.983871	0.878049	0.924242	0.972973	0.879391	0.919	0.941748	21	1	10	2	0.954545	0.833333	0.913043	0.909091	0.804824	0.985	0.911765
LCFP10	61	1	36	5	0.983871	0.878049	0.924242	0.972973	0.879391	0.917	0.941748	21	1	10	2	0.954545	0.833333	0.913043	0.909091	0.804824	0.985	0.911765
LPFP4	60	2	36	5	0.967742	0.878049	0.923077	0.947368	0.858029	0.927	0.932039	21	1	10	2	0.954545	0.833333	0.913043	0.909091	0.804824	0.977	0.911765
LPFP6	60	2	36	2	0.967742	0.947368	0.967742	0.947368	0.91511	0.923	0.96	21	1	10	2	0.954545	0.833333	0.913043	0.909091	0.804824	0.977	0.911765
LPFP8	60	2	37	4	0.967742	0.902439	0.9375	0.948718	0.878163	0.922	0.941748	21	1	10	2	0.954545	0.833333	0.913043	0.909091	0.804824	0.973	0.911765
LPFP10	60	2	36	5	0.967742	0.878049	0.923077	0.947368	0.858029	0.923	0.932039	21	1	10	2	0.954545	0.833333	0.913043	0.909091	0.804824	0.97	0.911765
LPFP12	61	1	36	5	0.983871	0.878049	0.924242	0.972973	0.879391	0.924	0.941748	21	1	10	2	0.954545	0.833333	0.913043	0.909091	0.804824	0.97	0.911765
MOE_3	39	2	61	1	2	0.983871	0.975	0.968254	0.939163	0.9965	0.970874	22	0	7	5	1	0.583333	0.814815	1	0.689426	0.7916	0.852941
MOE_4	39	2	58	4	0.95122	0.935484	0.906977	0.966667	0.880149	0.9896	0.941748	22	0	7	5	1	0.583333	0.814815	1	0.689426	0.7727	0.852941
MOE_5	38	3	55	7	0.926829	0.887097	0.844444	0.948276	0.803253	0.9766	0.902913	18	4	8	4	0.818182	0.666667	0.818182	0.666667	0.484848	0.814	0.764706
MOE_6	39	2	51	11	0.95122	0.822581	0.78	0.962264	0.757868	0.9636	0.873786	18	4	8	4	0.818182	0.666667	0.818182	0.666667	0.484848	0.8072	0.8143
MOE_7	36	5	54	8	0.878049	0.870968	0.818182	0.915254	0.741185	0.9323	0.873786	19	3	8	4	0.863636	0.666667	0.826087	0.727273	0.541709	0.8238	0.794118
MOE_8	34	7	52	10	0.829268	0.83871	0.772727	0.881356	0.660994	0.8906	0.834951	19	3	8	4	0.863636	0.666667	0.826087	0.727273	0.541709	0.8238	0.794118
MOE_9	39	2	48	14	0.95122	0.774194	0.735849	0.96	0.710477	0.9009	0.84466	18	4	10	2	0.818182	0.833333	0.9	0.714286	0.75	0.82197	0.823529
MOE_10	34	7	52	10	0.829268	0.83871	0.772727	0.881356	0.660994	0.8489	0.834951	20	2	9	3	0.909091	0.75	0.869565	0.818182	0.673267	0.82955	0.852941
DS_3	41	0	55	7	1	0.887097	0.854167	1	0.870476	0.9894	0.932039	20	2	6	6	0.909091	0.5	0.769231	0.75	0.460882	0.7121	0.764706
DS_4	31	10	61	1	0.756098	0.983871	0.96875	0.859155	0.782703	0.9148	0.893204	20	2	8	4	0.909091	0.666667	0.833333	0.8	0.60386	0.7973	0.823529
DS_5	35	6	57	5	0.853659	0.919355	0.875	0.904762	0.77638	0.9542	0.893204	20	2	7	5	0.909091	0.583333	0.8	0.777778	0.533396	0.712	0.794118
DS_6	37	4	52	10	0.902439	0.83871	0.787234	0.928571	0.728367	0.9591	0.864078	19	3	7	5	0.863636	0.583333	0.791667	0.7	0.468786	0.7121	0.764706
DS_7	33	8	55	7	0.804878	0.887097	0.825	0.873016	0.694989	0.9085	0.854369	18	4	6	6	0.818182	0.5	0.75	0.6	0.333712	0.6344	0.705882
DS_8	35	6	53	9	0.853659	0.854839	0.795455	0.898305	0.70109	0.9095	0.854369	18	4	6	6	0.818182	0.5	0.75	0.6	0.333712	0.6458	0.705882
DS_9	35	6	53	9	0.853659	0.854839	0.795455	0.898305	0.70109	0.9093	0.854369	17	5	6	6	0.772727	0.5	0.73913	0.545455	0.278593	0.6439	0.676471
DS_10	35	6	53	9	0.853659	0.854839	0.795455	0.898305	0.70109	0.9091	0.854369	18	4	6	6	0.818182	0.5	0.75	0.6	0.333712	0.6458	0.705882
