# Supplementary material for: Discovering new DNA gyrase inhibitors using machine learning approaches
Source: Royal Society of Chemistry journal article supplement (doi:10.1039/c5ra22568j), 2015-01-01
Supplement: c5ra22568j7.xlsx [file c5ra22568j7.xlsx]

## Sheet: NB
Descriptors	Training set											Test set
	TP	FN	TN	FP	SE	SP	Q+	Q-	C	AUC	Q	TP	FN	TN	FP	SE	SP	Q+	Q-	C	AUC	Q
MOE_36(MP)	58	4	37	4	0.935484	0.902439	0.935484	0.902439	0.837923	0.928	0.92233	21	1	7	5	0.954545	0.583333	0.807692	0.875	0.605975	0.909	0.823529
MOE+ECFP
MOE+ECFP_4	61	1	37	4	0.983871	0.902439	0.938462	0.973684	0.899135	0.932	0.951456	19	3	12	0	0.863636	1	1	0.8	0.831209	0.985	0.911765
MOE+ECFP_6	61	1	36	5	0.983871	0.878049	0.924242	0.972973	0.879391	0.928	0.941748	19	3	12	0	0.863636	1	1	0.8	0.831209	0.985	0.911765
MOE+ECFP_8	61	1	36	5	0.983871	0.878049	0.924242	0.972973	0.879391	0.923	0.941748	21	1	10	2	0.954545	0.833333	0.913043	0.909091	0.804824	0.989	0.911765
MOE+ECFP_10	61	1	36	5	0.983871	0.878049	0.924242	0.972973	0.879391	0.92	0.941748	20	2	11	1	0.909091	0.916667	0.952381	0.846154	0.812032	0.989	0.911765
MOE+ECFP_12	61	1	37	4	0.983871	0.902439	0.938462	0.973684	0.899135	0.919	0.951456	20	2	11	1	0.909091	0.916667	0.952381	0.846154	0.812032	0.989	0.911765
MOE + EPFP
MOE + EPFP_4	59	3	37	4	0.951613	0.902439	0.936508	0.925	0.857772	0.894	0.932039	20	2	12	0	0.909091	1	1	0.857143	0.882735	0.985	0.941176
MOE + EPFP_6	59	3	36	5	0.951613	0.878049	0.921875	0.923077	0.837272	0.91	0.92233	19	3	12	0	0.863636	1	1	0.8	0.831209	0.981	0.911765
MOE + EPFP_8	58	4	36	5	0.935484	0.878049	0.920635	0.9	0.817076	0.915	0.912621	21	1	12	0	0.954545	1	1	0.923077	0.938679	0.992	0.970588
MOE + EPFP_10	59	3	37	4	0.951613	0.902439	0.936508	0.925	0.857772	0.916	0.932039	21	1	10	2	0.954545	0.833333	0.913043	0.909091	0.804824	0.992	0.911765
MOE + FCFP
MOE + FCFP_4	55	7	39	2	0.887097	0.95122	0.964912	0.847826	0.825428	0.937	0.912621	20	2	10	2	0.909091	0.833333	0.909091	0.833333	0.742424	0.97	0.882353
MOE +FCFP_6	59	3	38	3	0.951613	0.926829	0.951613	0.926829	0.878442	0.93	0.941748	19	3	12	0	0.863636	1	1	0.8	0.831209	0.985	0.911765
MOE +FCFP_8	57	5	39	2	0.919355	0.95122	0.966102	0.886364	0.861472	0.922	0.932039	21	1	10	2	0.954545	0.833333	0.913043	0.909091	0.804824	0.989	0.911765
MOE +FCFP_10	58	4	40	1	0.935484	0.97561	0.983051	0.909091	0.901568	0.919	0.951456	21	1	10	2	0.954545	0.833333	0.913043	0.909091	0.804824	0.989	0.911765
MOE +FCFP_12	59	4	36	5	0.936508	0.878049	0.921875	0.9	0.818208	0.941	0.913462	21	1	8	4	0.954545	0.666667	0.84	0.888889	0.6729	0.924	0.852941
MOE + FPFP
MOE + FPFP_4	55	7	39	2	0.887097	0.95122	0.964912	0.847826	0.825428	0.896	0.852	20	2	12	0	0.909091	1	1	0.857143	0.882735	0.973	0.941176
MOE +FPFP_6	57	5	39	2	0.919355	0.95122	0.966102	0.886364	0.861472	0.907	0.869	19	3	11	1	0.863636	0.916667	0.95	0.785714	0.757681	0.973	0.882353
MOE +FPFP_8	56	6	39	2	0.903226	0.95122	0.965517	0.866667	0.843241	0.915	0.883	21	1	10	2	0.954545	0.833333	0.913043	0.909091	0.804824	981	0.911765
MOE +FPFP_10	56	6	39	2	0.903226	0.95122	0.965517	0.866667	0.843241	0.911	0.92233	21	1	10	2	0.954545	0.833333	0.913043	0.909091	0.804824	0.981	0.911765
MOE + LCFP
MOE + LCFP_4	61	1	37	4	0.983871	0.902439	0.938462	0.973684	0.899135	0.929	0.951456	19	3	12	0	0.863636	1	1	0.8	0.831209	0.977	0.911765
MOE +LCFP_6	61	1	37	4	0.983871	0.902439	0.938462	0.973684	0.899135	0.924	0.951456	20	2	10	2	0.909091	0.833333	0.909091	0.833333	0.742424	0.977	0.882353
MOE + LCFP_8	61	1	37	4	0.983871	0.902439	0.938462	0.973684	0.899135	0.921	0.951456	20	2	10	2	0.909091	0.833333	0.909091	0.833333	0.742424	0.977	0.882353
MOE + LCFP_10	61	1	37	4	0.983871	0.902439	0.938462	0.973684	0.899135	0.919	0.951456	20	2	10	2	0.909091	0.833333	0.909091	0.833333	0.742424	0.977	0.882353
MOE + LCFP_12	61	1	37	4	0.983871	0.902439	0.938462	0.973684	0.899135	0.917	0.951456	20	2	10	2	0.909091	0.833333	0.909091	0.833333	0.742424	0.977	0.882353
MOE + LPFP
MOE + LPFP_4	61	1	36	5	0.983871	0.878049	0.924242	0.972973	0.879391	0.927	0.941748	21	1	10	2	0.954545	0.833333	0.913043	0.909091	0.804824	0.977	0.911765
MOE +LPFP_6	59	3	37	4	0.951613	0.902439	0.936508	0.925	0.857772	0.923	0.932039	21	1	10	2	0.954545	0.833333	0.913043	0.909091	0.804824	0.977	0.911765
MOE +LPFP_8	60	2	36	5	0.967742	0.878049	0.923077	0.947368	0.858029	0.921	0.932039	20	2	10	2	0.909091	0.833333	0.909091	0.833333	0.742424	0.973	0.882353
MOE +LPFP_10	60	2	36	5	0.967742	0.878049	0.923077	0.947368	0.858029	0.923	0.932039	21	1	10	2	0.954545	0.833333	0.913043	0.909091	0.804824	0.97	0.911765
MOE +LPFP_12	61	1	36	5	0.983871	0.878049	0.924242	0.972973	0.879391	0.923	0.941748	21	1	10	2	0.954545	0.833333	0.913043	0.909091	0.804824	0.97	0.911765
Descriptors	Training set											Test set
	TP	FN	TN	FP	SE	SP	Q+	Q-	C	AUC	Q	TP	FN	TN	FP	SE	SP	Q+	Q-	C	AUC	Q
DS+ECFP
DS+ECFP_4	56	6	39	2	0.903226	0.95122	0.965517	0.866667	0.843241	0.93	0.92233	20	2	10	2	0.909091	0.833333	0.909091	0.833333	0.742424	0.981	0.882353
DS+ECFP_6	60	2	39	2	0.967742	0.95122	0.967742	0.95122	0.918961	0.924	0.961165	20	2	11	1	0.909091	0.916667	0.952381	0.846154	0.812032	0.985	0.911765
DS+ECFP_8	60	2	39	2	0.967742	0.95122	0.967742	0.95122	0.918961	0.921	0.961165	20	2	10	2	0.909091	0.833333	0.909091	0.833333	0.742424	0.985	0.882353
DS+ECFP_10	60	2	40	1	0.967742	0.97561	0.983607	0.952381	0.939662	0.92	0.970874	20	2	10	2	0.909091	0.833333	0.909091	0.833333	0.742424	0.985	0.882353
DS+ECFP_12	60	2	40	1	0.967742	0.97561	0.983607	0.952381	0.939662	0.92	0.970874	20	2	11	1	0.909091	0.916667	0.952381	0.846154	0.812032	0.985	0.911765
DS + EPFP
DS + EPFP_4	57	5	38	3	0.919355	0.926829	0.95	0.883721	0.839929	0.894	0.92233	20	2	12	0	0.909091	1	1	0.857143	0.882735	0.97	0.941176
DS + EPFP_6	59	3	36	5	0.951613	0.878049	0.921875	0.923077	0.837272	0.91	0.92233	21	1	10	2	0.954545	0.833333	0.913043	0.909091	0.804824	0.985	0.911765
DS + EPFP_8	58	4	38	3	0.935484	0.926829	0.95082	0.904762	0.858941	0.915	0.932039	21	1	10	2	0.954545	0.833333	0.913043	0.909091	0.804824	0.992	0.911765
DS + EPFP_10	57	5	39	2	0.919355	0.95122	0.966102	0.886364	0.861472	0.916	0.932039	21	2	10	2	0.913043	0.833333	0.913043	0.833333	0.746377	0.992	0.885714
DS + FCFP
DS + FCFP_4	54	8	39	2	0.870968	0.95122	0.964286	0.829787	0.808008	0.931	0.902913	20	2	11	1	0.909091	0.916667	0.952381	0.846154	0.812032	0.973	0.911765
DS +FCFP_6	57	5	39	2	0.919355	0.95122	0.966102	0.886364	0.861472	0.921	0.932039	20	2	11	1	0.909091	0.916667	0.952381	0.846154	0.812032	0.977	0.911765
DS +FCFP_8	58	4	39	2	0.935484	0.95122	0.966667	0.906977	0.880149	0.917	0.941748	20	2	11	1	0.909091	0.916667	0.952381	0.846154	0.812032	0.985	0.911765
DS +FCFP_10	58	4	40	1	0.935484	0.97561	0.983051	0.909091	0.901568	0.915	0.951456	20	2	10	2	0.909091	0.833333	0.909091	0.833333	0.742424	0.985	0.882353
DS +FCFP_12	53	9	38	3	0.854839	0.926829	0.946429	0.808511	0.768187	0.926	0.883495	19	3	7	5	0.863636	0.583333	0.791667	0.7	0.468786	0.902	0.764706
DS + FPFP
DS + FPFP_4	54	8	39	2	0.870968	0.95122	0.964286	0.829787	0.808008	0.892	0.902913	20	2	12	0	0.909091	1	1	0.857143	0.882735	0.973	0.941176
DS +FPFP_6	56	6	39	2	0.903226	0.95122	0.965517	0.866667	0.843241	0.908	0.92233	21	1	10	2	0.954545	0.833333	0.913043	0.909091	0.804824	0.973	0.911765
DS +FPFP_8	56	6	39	2	0.903226	0.95122	0.965517	0.866667	0.843241	0.915	0.92233	21	1	10	2	0.954545	0.833333	0.913043	0.909091	0.804824	0.981	0.911765
DS +FPFP_10	56	6	39	2	0.903226	0.95122	0.965517	0.866667	0.843241	0.911	0.92233	21	1	10	2	0.954545	0.833333	0.913043	0.909091	0.804824	0.981	0.911765
DS + LCFP
DS + LCFP_4	61	1	38	3	0.983871	0.926829	0.953125	0.974359	0.919054	0.925	0.961165	21	1	10	2	0.954545	0.833333	0.913043	0.909091	0.804824	0.977	0.911765
DS +LCFP_6	61	1	38	3	0.983871	0.926829	0.953125	0.974359	0.919054	0.923	0.961165	21	1	10	2	0.954545	0.833333	0.913043	0.909091	0.804824	0.977	0.911765
DS + LCFP_8	61	1	38	3	0.983871	0.926829	0.953125	0.974359	0.919054	0.922	0.961165	22	0	10	2	1	0.833333	0.916667	1	0.874007	0.981	0.941176
DS + LCFP_10	61	1	37	4	0.983871	0.902439	0.938462	0.973684	0.899135	0.92	0.951456	20	2	10	2	0.909091	0.833333	0.909091	0.833333	0.742424	0.981	0.882353
DS + LPFP
DS + LPFP_4	61	1	36	5	0.983871	0.878049	0.924242	0.972973	0.879391	0.926	0.941748	21	1	10	2	0.954545	0.833333	0.913043	0.909091	0.804824	0.977	0.911765
DS +LPFP_6	60	2	36	5	0.967742	0.878049	0.923077	0.947368	0.858029	0.923	0.932039	21	1	10	2	0.954545	0.833333	0.913043	0.909091	0.804824	0.977	0.911765
DS +LPFP_8	60	2	36	5	0.967742	0.878049	0.923077	0.947368	0.858029	0.921	0.932039	21	1	10	2	0.954545	0.833333	0.913043	0.909091	0.804824	0.973	0.911765
DS +LPFP_10	60	2	36	5	0.967742	0.878049	0.923077	0.947368	0.858029	0.923	0.932039	21	1	10	2	0.954545	0.833333	0.913043	0.909091	0.804824	0.97	0.911765
DS +LPFP_12	61	1	36	5	0.983871	0.878049	0.924242	0.972973	0.879391	0.924	0.941748	21	1	10	2	0.954545	0.833333	0.913043	0.909091	0.804824	0.97	0.911765

## Sheet: DT
DS+FP	Training set											Test set
Descriptors	TP	FN	TN	FP	SE	SP	Q+	Q-	C	AUC	Q	TP	FN	TN	FP	SE	SP	Q+	Q-	C	AUC	Q
Fingerprint=ECFP4
DS+ECFP4_3	35	6	46	16	0.853659	0.741935	0.686275	0.884615	0.583111	0.7978	0.786408	22	0	9	3	1	0.75	0.88	1	0.812404	0.875	0.911765
DS+ECFP4_4	35	6	46	16	0.853659	0.741935	0.686275	0.884615	0.583111	0.7978	0.786408	22	0	8	4	1	0.666667	0.846154	1	0.751068	0.875	0.882353
DS+ECFP4_5	35	6	46	16	0.853659	0.741935	0.686275	0.884615	0.583111	0.7978	0.786408	21	1	9	3	0.954545	0.75	0.875	0.9	0.738934	0.871	0.882353
DS+ECFP4_6	35	6	46	16	0.853659	0.741935	0.686275	0.884615	0.583111	0.7978	0.786408	21	1	9	3	0.954545	0.75	0.875	0.9	0.738934	0.8712	0.882353
DS+ECFP4_7	35	6	46	16	0.853659	0.741935	0.686275	0.884615	0.583111	0.7978	0.786408	21	1	9	3	0.954545	0.75	0.875	0.9	0.738934	0.8712	0.882353
DS+ECFP4_8	35	6	46	16	0.853659	0.741935	0.686275	0.884615	0.583111	0.7978	0.786408	20	2	9	3	0.909091	0.75	0.869565	0.818182	0.673267	0.867	0.852941
Fingerprint=ECFP6
DS+ECFP6_3	35	6	46	16	0.853659	0.741935	0.686275	0.884615	0.583111	0.7978	0.786408	22	0	9	3	1	0.75	0.88	1	0.812404	0.875	0.911765
DS+ECFP6_4	35	6	46	16	0.853659	0.741935	0.686275	0.884615	0.583111	0.7978	0.786408	22	0	8	4	1	0.666667	0.846154	1	0.751068	0.875	0.882353
DS+ECFP6_5	35	6	46	16	0.853659	0.741935	0.686275	0.884615	0.583111	0.7978	0.786408	21	1	9	3	0.954545	0.75	0.875	0.9	0.738934	0.871	0.882353
DS+ECFP6_6	35	6	46	16	0.853659	0.741935	0.686275	0.884615	0.583111	0.7978	0.786408	21	1	9	3	0.954545	0.75	0.875	0.9	0.738934	0.8712	0.882353
DS+ECFP6_7	35	6	46	16	0.853659	0.741935	0.686275	0.884615	0.583111	0.7978	0.786408	21	1	9	3	0.954545	0.75	0.875	0.9	0.738934	0.8712	0.882353
DS+ECFP6_8	35	6	46	16	0.853659	0.741935	0.686275	0.884615	0.583111	0.7978	0.786408	20	2	9	3	0.909091	0.75	0.869565	0.818182	0.673267	0.867	0.852941
Fingerprint=ECFP8
DS+ECFP8_3	35	6	46	16	0.853659	0.741935	0.686275	0.884615	0.583111	0.7978	0.786408	22	0	9	3	1	0.75	0.88	1	0.812404	0.875	0.911765
DS+ECFP8_4	35	6	46	16	0.853659	0.741935	0.686275	0.884615	0.583111	0.7978	0.786408	22	0	8	4	1	0.666667	0.846154	1	0.751068	0.875	0.882353
DS+ECFP8_5	35	6	46	16	0.853659	0.741935	0.686275	0.884615	0.583111	0.7978	0.786408	21	1	9	3	0.954545	0.75	0.875	0.9	0.738934	0.871	0.882353
DS+ECFP8_6	35	6	46	16	0.853659	0.741935	0.686275	0.884615	0.583111	0.7978	0.786408	21	1	9	3	0.954545	0.75	0.875	0.9	0.738934	0.8712	0.882353
DS+ECFP8_7	35	6	46	16	0.853659	0.741935	0.686275	0.884615	0.583111	0.7978	0.786408	21	1	9	3	0.954545	0.75	0.875	0.9	0.738934	0.8712	0.882353
DS+ECFP8_8	35	6	46	16	0.853659	0.741935	0.686275	0.884615	0.583111	0.7978	0.786408	20	2	9	3	0.909091	0.75	0.869565	0.818182	0.673267	0.867	0.852941
Fingerprint=ECFP10
DS+ECFP10_3	35	6	46	16	0.853659	0.741935	0.686275	0.884615	0.583111	0.7978	0.786408	22	0	9	3	1	0.75	0.88	1	0.812404	0.875	0.911765
DS+ECFP10_4	35	6	46	16	0.853659	0.741935	0.686275	0.884615	0.583111	0.7978	0.786408	22	0	8	4	1	0.666667	0.846154	1	0.751068	0.875	0.882353
DS+ECFP10_5	35	6	46	16	0.853659	0.741935	0.686275	0.884615	0.583111	0.7978	0.786408	21	1	9	3	0.954545	0.75	0.875	0.9	0.738934	0.871	0.882353
DS+ECFP10_6	35	6	46	16	0.853659	0.741935	0.686275	0.884615	0.583111	0.7978	0.786408	21	1	9	3	0.954545	0.75	0.875	0.9	0.738934	0.8712	0.882353
DS+ECFP10_7	35	6	46	16	0.853659	0.741935	0.686275	0.884615	0.583111	0.7978	0.786408	21	1	9	3	0.954545	0.75	0.875	0.9	0.738934	0.8712	0.882353
DS+ECFP10_8	35	6	46	16	0.853659	0.741935	0.686275	0.884615	0.583111	0.7978	0.786408	20	2	9	3	0.909091	0.75	0.869565	0.818182	0.673267	0.867	0.852941
Fingerprint=ECFP12
DS+ECFP12_3	35	6	46	16	0.853659	0.741935	0.686275	0.884615	0.583111	0.7978	0.786408	22	0	9	3	1	0.75	0.88	1	0.812404	0.875	0.911765
DS+ECFP12_4	35	6	46	16	0.853659	0.741935	0.686275	0.884615	0.583111	0.7978	0.786408	22	0	8	4	1	0.666667	0.846154	1	0.751068	0.875	0.882353
DS+ECFP12_5	35	6	46	16	0.853659	0.741935	0.686275	0.884615	0.583111	0.7978	0.786408	21	1	9	3	0.954545	0.75	0.875	0.9	0.738934	0.871	0.882353
DS+ECFP12_6	35	6	46	16	0.853659	0.741935	0.686275	0.884615	0.583111	0.7978	0.786408	21	1	9	3	0.954545	0.75	0.875	0.9	0.738934	0.8712	0.882353
DS+ECFP12_7	35	6	46	16	0.853659	0.741935	0.686275	0.884615	0.583111	0.7978	0.786408	21	1	9	3	0.954545	0.75	0.875	0.9	0.738934	0.8712	0.882353
DS+ECFP12_8	35	6	46	16	0.853659	0.741935	0.686275	0.884615	0.583111	0.7978	0.786408	20	2	9	3	0.909091	0.75	0.869565	0.818182	0.673267	0.867	0.852941
Fingerprint=EPFP4
DS+EPFP4_3	27	14	61	1	0.658537	0.983871	0.964286	0.813333	0.706787	0.8226	0.854369	21	1	9	3	0.954545	0.75	0.875	0.9	0.738934	0.8579	0.882353
DS+EPFP4_4	27	14	61	1	0.658537	0.983871	0.964286	0.813333	0.706787	0.8226	0.854369	22	0	9	3	1	0.75	0.88	1	0.812404	0.958	0.911765
DS+EPFP4_5	27	14	61	1	0.658537	0.983871	0.964286	0.813333	0.706787	0.8226	0.854369	22	0	11	1	1	0.916667	0.956522	1	0.936382	0.958	0.970588
DS+EPFP4_6	27	14	61	1	0.658537	0.983871	0.964286	0.813333	0.706787	0.8226	0.854369	20	0	9	3	1	0.75	0.869565	1	0.807573	0.816	0.90625
DS+EPFP4_7	27	14	61	1	0.658537	0.983871	0.964286	0.813333	0.706787	0.8226	0.854369	22	0	9	3	1	0.75	0.88	1	0.812404	0.8768	0.911765
DS+EPFP4_8	27	14	60	2	0.658537	0.967742	0.931034	0.810811	0.681617	0.8157	0.84466	22	0	9	3	1	0.75	0.88	1	0.812404	0.9299	0.911765
Fingerprint=EPFP6
DS+EPFP6_3	41	0	37	25	1	0.596774	0.621212	1	0.608871	0.798	0.757282	21	1	10	2	0.954545	0.833333	0.913043	0.909091	0.804824	0.9015	0.911765
DS+EPFP6_4	41	0	37	25	1	0.596774	0.621212	1	0.608871	0.798	0.757282	21	1	10	2	0.954545	0.833333	0.913043	0.909091	0.804824	0.9545	0.911765
DS+EPFP6_5	41	0	37	25	1	0.596774	0.621212	1	0.608871	0.798	0.757282	20	2	12	0	0.909091	1	1	0.857143	0.882735	0.979	0.941176
DS+EPFP6_6	41	0	37	25	1	0.596774	0.621212	1	0.608871	0.798	0.757282	20	2	10	2	0.909091	0.833333	0.909091	0.833333	0.742424	0.8996	0.882353
DS+EPFP6_7	41	0	37	25	1	0.596774	0.621212	1	0.608871	0.798	0.757282	20	2	10	2	0.909091	0.833333	0.909091	0.833333	0.742424	0.8996	0.882353
DS+EPFP6_8	41	0	37	25	1	0.596774	0.621212	1	0.608871	0.798	0.757282	20	2	10	2	0.909091	0.833333	0.909091	0.833333	0.742424	0.892	0.882353
Fingerprint=EPFP8
DS+EPFP8_3	41	0	37	25	1	0.596774	0.621212	1	0.608871	0.798	0.757282	21	1	10	2	0.954545	0.833333	0.913043	0.909091	0.804824	0.9015	0.911765
DS+EPFP8_4	41	0	37	25	1	0.596774	0.621212	1	0.608871	0.798	0.757282	21	1	10	2	0.954545	0.833333	0.913043	0.909091	0.804824	0.9545	0.911765
DS+EPFP8_5	41	0	37	25	1	0.596774	0.621212	1	0.608871	0.798	0.757282	20	2	12	0	0.909091	1	1	0.857143	0.882735	0.979	0.941176
DS+EPFP8_6	41	0	37	25	1	0.596774	0.621212	1	0.608871	0.798	0.757282	20	2	10	2	0.909091	0.833333	0.909091	0.833333	0.742424	0.8996	0.882353
DS+EPFP8_7	41	0	37	25	1	0.596774	0.621212	1	0.608871	0.798	0.757282	20	2	10	2	0.909091	0.833333	0.909091	0.833333	0.742424	0.8996	0.882353
DS+EPFP8_8	41	0	37	25	1	0.596774	0.621212	1	0.608871	0.798	0.757282	20	2	10	2	0.909091	0.833333	0.909091	0.833333	0.742424	0.892	0.882353
Fingerprint=EPFP10
DS+EPFP10_3	41	0	37	25	1	0.596774	0.621212	1	0.608871	0.798	0.757282	21	1	10	2	0.954545	0.833333	0.913043	0.909091	0.804824	0.9015	0.911765
DS+EPFP10_4	41	0	37	25	1	0.596774	0.621212	1	0.608871	0.798	0.757282	21	1	10	2	0.954545	0.833333	0.913043	0.909091	0.804824	0.9545	0.911765
DS+EPFP10_5	41	0	37	25	1	0.596774	0.621212	1	0.608871	0.798	0.757282	20	2	12	0	0.909091	1	1	0.857143	0.882735	0.979	0.941176
DS+EPFP10_6	41	0	37	25	1	0.596774	0.621212	1	0.608871	0.798	0.757282	20	2	10	2	0.909091	0.833333	0.909091	0.833333	0.742424	0.8996	0.882353
DS+EPFP10_7	41	0	37	25	1	0.596774	0.621212	1	0.608871	0.798	0.757282	20	2	10	2	0.909091	0.833333	0.909091	0.833333	0.742424	0.8996	0.882353
DS+EPFP10_8	41	0	37	25	1	0.596774	0.621212	1	0.608871	0.798	0.757282	20	2	10	2	0.909091	0.833333	0.909091	0.833333	0.742424	0.892	0.882353
Fingerprint=FCFP4
DS+FCFP4_3	37	4	39	23	0.902439	0.629032	0.616667	0.906977	0.527543	0.7657	0.737864	19	3	9	3	0.863636	0.75	0.863636	0.75	0.613636	0.831	0.823529
DS+FCFP4_4	37	4	39	23	0.902439	0.629032	0.616667	0.906977	0.527543	0.7657	0.737864	18	4	10	2	0.818182	0.833333	0.9	0.714286	0.632627	0.831	0.823529
DS+FCFP4_5	37	4	39	23	0.902439	0.629032	0.616667	0.906977	0.527543	0.7657	0.737864	17	5	10	2	0.772727	0.833333	0.894737	0.666667	0.583305	0.8215	0.794118
DS+FCFP4_6	37	4	39	23	0.902439	0.629032	0.616667	0.906977	0.527543	0.7657	0.737864	17	5	10	2	0.772727	0.833333	0.894737	0.666667	0.583305	0.816	0.794118
DS+FCFP4_7	37	4	39	23	0.902439	0.629032	0.616667	0.906977	0.527543	0.7657	0.737864	17	5	10	2	0.772727	0.833333	0.894737	0.666667	0.583305	0.8181	0.794118
DS+FCFP4_8	37	4	39	23	0.902439	0.629032	0.616667	0.906977	0.527543	0.7657	0.737864	18	4	9	3	0.818182	0.75	0.857143	0.692308	0.558738	0.8276	0.794118
Fingerprint=FCFP6
DS+FCFP6_3	37	4	39	23	0.902439	0.629032	0.616667	0.906977	0.527543	0.7657	0.737864	17	5	11	1	0.772727	0.916667	0.944444	0.6875	0.660044	0.8447	0.823529
DS+FCFP6_4	37	4	39	23	0.902439	0.629032	0.616667	0.906977	0.527543	0.7657	0.737864	17	5	11	1	0.772727	0.916667	0.944444	0.6875	0.660044	0.8484	0.823529
DS+FCFP6_5	37	4	39	23	0.902439	0.629032	0.616667	0.906977	0.527543	0.7657	0.737864	17	5	10	2	0.772727	0.833333	0.894737	0.666667	0.583305	0.8215	0.794118
DS+FCFP6_6	37	4	39	23	0.902439	0.629032	0.616667	0.906977	0.527543	0.7657	0.737864	17	5	10	2	0.772727	0.833333	0.894737	0.666667	0.583305	0.816	0.794118
DS+FCFP6_7	37	4	39	23	0.902439	0.629032	0.616667	0.906977	0.527543	0.7657	0.737864	17	5	10	2	0.772727	0.833333	0.894737	0.666667	0.583305	0.8181	0.794118
DS+FCFP6_8	37	4	39	23	0.902439	0.629032	0.616667	0.906977	0.527543	0.7657	0.737864	18	4	9	3	0.818182	0.75	0.857143	0.692308	0.558738	0.8276	0.794118
Fingerprint=FCFP8
DS+FCFP8_3	37	4	39	23	0.902439	0.629032	0.616667	0.906977	0.527543	0.7657	0.737864	17	5	11	1	0.772727	0.916667	0.944444	0.6875	0.660044	0.8447	0.823529
DS+FCFP8_4	37	4	39	23	0.902439	0.629032	0.616667	0.906977	0.527543	0.7657	0.737864	17	5	11	1	0.772727	0.916667	0.944444	0.6875	0.660044	0.8484	0.823529
DS+FCFP8_5	37	4	39	23	0.902439	0.629032	0.616667	0.906977	0.527543	0.7657	0.737864	17	5	10	2	0.772727	0.833333	0.894737	0.666667	0.583305	0.8215	0.794118
DS+FCFP8_6	37	4	39	23	0.902439	0.629032	0.616667	0.906977	0.527543	0.7657	0.737864	17	5	10	2	0.772727	0.833333	0.894737	0.666667	0.583305	0.816	0.794118
DS+FCFP8_7	37	4	39	23	0.902439	0.629032	0.616667	0.906977	0.527543	0.7657	0.737864	17	5	10	2	0.772727	0.833333	0.894737	0.666667	0.583305	0.8181	0.794118
DS+FCFP8_8	37	4	39	23	0.902439	0.629032	0.616667	0.906977	0.527543	0.7657	0.737864	18	4	9	3	0.818182	0.75	0.857143	0.692308	0.558738	0.8276	0.794118
Fingerprint=FCFP10
DS+FCFP10_3	37	4	39	23	0.902439	0.629032	0.616667	0.906977	0.527543	0.7657	0.737864	17	5	11	1	0.772727	0.916667	0.944444	0.6875	0.660044	0.8447	0.823529
DS+FCFP10_4	37	4	39	23	0.902439	0.629032	0.616667	0.906977	0.527543	0.7657	0.737864	17	5	11	1	0.772727	0.916667	0.944444	0.6875	0.660044	0.8484	0.823529
DS+FCFP10_5	37	4	39	23	0.902439	0.629032	0.616667	0.906977	0.527543	0.7657	0.737864	17	5	10	2	0.772727	0.833333	0.894737	0.666667	0.583305	0.8215	0.794118
DS+FCFP10_6	37	4	39	23	0.902439	0.629032	0.616667	0.906977	0.527543	0.7657	0.737864	17	5	10	2	0.772727	0.833333	0.894737	0.666667	0.583305	0.816	0.794118
DS+FCFP10_7	37	4	39	23	0.902439	0.629032	0.616667	0.906977	0.527543	0.7657	0.737864	17	5	10	2	0.772727	0.833333	0.894737	0.666667	0.583305	0.8181	0.794118
DS+FCFP10_8	37	4	39	23	0.902439	0.629032	0.616667	0.906977	0.527543	0.7657	0.737864	18	4	9	3	0.818182	0.75	0.857143	0.692308	0.558738	0.8276	0.794118
Fingerprint=FCFP12
DS+FCFP12_3	39	2	58	4	0.95122	0.935484	0.906977	0.966667	0.880149	0.9113	0.941748	22	0	8	4	1	0.666667	0.846154	1	0.751068	0.8333	0.882353
DS+FCFP12_4	39	2	58	4	0.95122	0.935484	0.906977	0.966667	0.880149	0.9113	0.941748	22	0	8	4	1	0.666667	0.846154	1	0.751068	0.8333	0.882353
DS+FCFP12_5	39	2	58	4	0.95122	0.935484	0.906977	0.966667	0.880149	0.963	0.941748	22	0	8	4	1	0.666667	0.846154	1	0.751068	0.8181	0.882353
DS+FCFP12_6	39	2	58	4	0.95122	0.935484	0.906977	0.966667	0.880149	0.963	0.941748	22	0	8	4	1	0.666667	0.846154	1	0.751068	0.8181	0.882353
DS+FCFP12_7	39	2	58	4	0.95122	0.935484	0.906977	0.966667	0.880149	0.963	0.941748	22	0	8	4	1	0.666667	0.846154	1	0.751068	0.8181	0.882353
DS+FCFP12_8	39	2	58	4	0.95122	0.935484	0.906977	0.966667	0.880149	0.963	0.941748	18	4	9	3	0.818182	0.75	0.857143	0.692308	0.558738	0.8181	0.794118
Fingerprint=FPFP4
DS+FPFP4_3	27	14	61	1	0.658537	0.983871	0.964286	0.813333	0.706787	0.8226	0.854369	22	0	10	2	1	0.833333	0.916667	1	0.874007	0.8939	0.941176
DS+FPFP4_4	27	14	61	1	0.658537	0.983871	0.964286	0.813333	0.706787	0.8226	0.854369	21	1	9	3	0.954545	0.75	0.875	0.9	0.738934	0.8409	0.882353
DS+FPFP4_5	27	14	61	1	0.658537	0.983871	0.964286	0.813333	0.706787	0.8226	0.854369	18	4	9	3	0.818182	0.75	0.857143	0.692308	0.558738	0.833	0.794118
DS+FPFP4_6	27	14	61	1	0.658537	0.983871	0.964286	0.813333	0.706787	0.8226	0.854369	18	4	9	3	0.818182	0.75	0.857143	0.692308	0.558738	0.833	0.794118
DS+FPFP4_7	20	21	61	1	0.487805	0.983871	0.952381	0.743902	0.573079	0.7358	0.786408	18	4	9	3	0.818182	0.75	0.857143	0.692308	0.558738	0.8162	0.794118
DS+FPFP4_8	20	21	61	1	0.487805	0.983871	0.952381	0.743902	0.573079	0.7358	0.786408	17	5	10	2	0.772727	0.833333	0.894737	0.666667	0.583305	0.8768	0.794118
Fingerprint=FPFP6
DS+FPFP6_3	27	14	61	1	0.658537	0.983871	0.964286	0.813333	0.706787	0.8226	0.854369	21	1	9	3	0.954545	0.75	0.875	0.9	0.738934	0.8617	0.882353
DS+FPFP6_4	27	14	61	1	0.658537	0.983871	0.964286	0.813333	0.706787	0.8226	0.854369	21	1	9	3	0.954545	0.75	0.875	0.9	0.738934	0.8219	0.882353
DS+FPFP6_5	27	14	61	1	0.658537	0.983871	0.964286	0.813333	0.706787	0.8226	0.854369	18	4	9	3	0.818182	0.75	0.857143	0.692308	0.558738	0.8219	0.794118
DS+FPFP6_6	27	14	61	1	0.658537	0.983871	0.964286	0.813333	0.706787	0.8226	0.854369	18	4	9	3	0.818182	0.75	0.857143	0.692308	0.558738	0.8579	0.794118
DS+FPFP6_7	20	21	61	1	0.487805	0.983871	0.952381	0.743902	0.573079	0.7358	0.786408	21	1	10	2	0.954545	0.833333	0.913043	0.909091	0.804824	0.9015	0.911765
DS+FPFP6_8	20	21	61	1	0.487805	0.983871	0.952381	0.743902	0.573079	0.7358	0.786408	13	9	11	1	0.590909	0.916667	0.928571	0.55	0.49286	0.895	0.705882
Fingerprint=FPFP8
DS+FPFP8_3	27	14	61	1	0.658537	0.983871	0.964286	0.813333	0.706787	0.8226	0.854369	21	1	9	3	0.954545	0.75	0.875	0.9	0.738934	0.861	0.882353
DS+FPFP8_4	27	14	61	1	0.658537	0.983871	0.964286	0.813333	0.706787	0.8226	0.854369	21	1	9	3	0.954545	0.75	0.875	0.9	0.738934	0.8181	0.882353
DS+FPFP8_5	27	14	61	1	0.658537	0.983871	0.964286	0.813333	0.706787	0.8226	0.854369	19	3	9	3	0.863636	0.75	0.863636	0.75	0.613636	0.9204	0.823529
DS+FPFP8_6	27	14	61	1	0.658537	0.983871	0.964286	0.813333	0.706787	0.8226	0.854369	20	2	9	3	0.909091	0.75	0.869565	0.818182	0.673267	0.9222	0.852941
DS+FPFP8_7	27	14	61	1	0.658537	0.983871	0.964286	0.813333	0.706787	0.8226	0.854369	21	1	10	2	0.954545	0.833333	0.913043	0.909091	0.804824	0.9015	0.911765
DS+FPFP8_8	20	21	61	1	0.487805	0.983871	0.952381	0.743902	0.573079	0.7358	0.786408	14	8	11	1	0.636364	0.916667	0.933333	0.578947	0.532266	0.8996	0.735294
Fingerprint=FPFP10
DS+FPFP10_3	27	14	61	1	0.658537	0.983871	0.964286	0.813333	0.706787	0.8226	0.854369	21	1	9	3	0.954545	0.75	0.875	0.9	0.738934	0.861	0.882353
DS+FPFP10_4	27	14	61	1	0.658537	0.983871	0.964286	0.813333	0.706787	0.8226	0.854369	21	1	9	3	0.954545	0.75	0.875	0.9	0.738934	0.8181	0.882353
DS+FPFP10_5	27	14	61	1	0.658537	0.983871	0.964286	0.813333	0.706787	0.8226	0.854369	19	3	9	3	0.863636	0.75	0.863636	0.75	0.613636	0.9204	0.823529
DS+FPFP10_6	27	14	61	1	0.658537	0.983871	0.964286	0.813333	0.706787	0.8226	0.854369	20	2	9	3	0.909091	0.75	0.869565	0.818182	0.673267	0.9222	0.852941
DS+FPFP10_7	27	14	61	1	0.658537	0.983871	0.964286	0.813333	0.706787	0.8226	0.854369	21	1	10	2	0.954545	0.833333	0.913043	0.909091	0.804824	0.9015	0.911765
DS+FPFP10_8	20	21	61	1	0.487805	0.983871	0.952381	0.743902	0.573079	0.7358	0.786408	14	8	11	1	0.636364	0.916667	0.933333	0.578947	0.532266	0.8996	0.735294
Fingerprint=LCFP4
DS+LCFP4_3	39	2	44	18	0.95122	0.709677	0.684211	0.956522	0.650736	0.8304	0.805825	21	1	10	2	0.954545	0.833333	0.913043	0.909091	0.804824	0.8977	0.911765
DS+LCFP4_4	39	2	44	18	0.95122	0.709677	0.684211	0.956522	0.650736	0.8304	0.805825	21	1	10	2	0.954545	0.833333	0.913043	0.909091	0.804824	0.8844	0.911765
DS+LCFP4_5	39	2	44	18	0.95122	0.709677	0.684211	0.956522	0.650736	0.8304	0.805825	19	3	10	2	0.863636	0.833333	0.904762	0.769231	0.685385	0.8314	0.852941
DS+LCFP4_6	39	2	44	18	0.95122	0.709677	0.684211	0.956522	0.650736	0.8304	0.805825	19	3	10	2	0.863636	0.833333	0.904762	0.769231	0.685385	0.8447	0.852941
DS+LCFP4_7	39	2	44	18	0.95122	0.709677	0.684211	0.956522	0.650736	0.8304	0.805825	18	4	11	1	0.818182	0.916667	0.947368	0.733333	0.707257	0.8579	0.852941
DS+LCFP4_8	39	2	44	18	0.95122	0.709677	0.684211	0.956522	0.650736	0.8304	0.805825	19	3	9	3	0.863636	0.75	0.863636	0.75	0.613636	0.8503	0.823529
Fingerprint=LCFP6
DS+LCFP6_3	39	2	44	18	0.95122	0.709677	0.684211	0.956522	0.650736	0.8304	0.805825	21	1	10	2	0.954545	0.833333	0.913043	0.909091	0.804824	0.8977	0.911765
DS+LCFP6_4	39	2	44	18	0.95122	0.709677	0.684211	0.956522	0.650736	0.8304	0.805825	21	1	10	2	0.954545	0.833333	0.913043	0.909091	0.804824	0.8844	0.911765
DS+LCFP6_5	39	2	44	18	0.95122	0.709677	0.684211	0.956522	0.650736	0.8304	0.805825	19	3	10	2	0.863636	0.833333	0.904762	0.769231	0.685385	0.8314	0.852941
DS+LCFP6_6	39	2	44	18	0.95122	0.709677	0.684211	0.956522	0.650736	0.8304	0.805825	19	3	10	2	0.863636	0.833333	0.904762	0.769231	0.685385	0.8447	0.852941
DS+LCFP6_7	39	2	44	18	0.95122	0.709677	0.684211	0.956522	0.650736	0.8304	0.805825	18	4	11	1	0.818182	0.916667	0.947368	0.733333	0.707257	0.8579	0.852941
DS+LCFP6_8	39	2	44	18	0.95122	0.709677	0.684211	0.956522	0.650736	0.8304	0.805825	19	3	9	3	0.863636	0.75	0.863636	0.75	0.613636	0.8503	0.823529
Fingerprint=LCFP8
DS+LCFP8_3	39	2	44	18	0.95122	0.709677	0.684211	0.956522	0.650736	0.8304	0.805825	21	1	10	2	0.954545	0.833333	0.913043	0.909091	0.804824	0.8977	0.911765
DS+LCFP8_4	39	2	44	18	0.95122	0.709677	0.684211	0.956522	0.650736	0.8304	0.805825	21	1	10	2	0.954545	0.833333	0.913043	0.909091	0.804824	0.8844	0.911765
DS+LCFP8_5	39	2	44	18	0.95122	0.709677	0.684211	0.956522	0.650736	0.8304	0.805825	19	3	10	2	0.863636	0.833333	0.904762	0.769231	0.685385	0.8314	0.852941
DS+LCFP8_6	39	2	44	18	0.95122	0.709677	0.684211	0.956522	0.650736	0.8304	0.805825	19	3	10	2	0.863636	0.833333	0.904762	0.769231	0.685385	0.8447	0.852941
DS+LCFP8_7	39	2	44	18	0.95122	0.709677	0.684211	0.956522	0.650736	0.8304	0.805825	18	4	11	1	0.818182	0.916667	0.947368	0.733333	0.707257	0.8579	0.852941
DS+LCFP8_8	39	2	44	18	0.95122	0.709677	0.684211	0.956522	0.650736	0.8304	0.805825	19	3	9	3	0.863636	0.75	0.863636	0.75	0.613636	0.8503	0.823529
Fingerprint=LCFP10
DS+LCFP10_3	39	2	44	18	0.95122	0.709677	0.684211	0.956522	0.650736	0.8304	0.805825	21	1	10	2	0.954545	0.833333	0.913043	0.909091	0.804824	0.8977	0.911765
DS+LCFP10_4	39	2	44	18	0.95122	0.709677	0.684211	0.956522	0.650736	0.8304	0.805825	21	1	10	2	0.954545	0.833333	0.913043	0.909091	0.804824	0.8844	0.911765
DS+LCFP10_5	39	2	44	18	0.95122	0.709677	0.684211	0.956522	0.650736	0.8304	0.805825	19	3	10	2	0.863636	0.833333	0.904762	0.769231	0.685385	0.8314	0.852941
DS+LCFP10_6	39	2	44	18	0.95122	0.709677	0.684211	0.956522	0.650736	0.8304	0.805825	19	3	10	2	0.863636	0.833333	0.904762	0.769231	0.685385	0.8447	0.852941
DS+LCFP10_7	39	2	44	18	0.95122	0.709677	0.684211	0.956522	0.650736	0.8304	0.805825	18	4	11	1	0.818182	0.916667	0.947368	0.733333	0.707257	0.8579	0.852941
DS+LCFP10_8	39	2	44	18	0.95122	0.709677	0.684211	0.956522	0.650736	0.8304	0.805825	19	3	9	3	0.863636	0.75	0.863636	0.75	0.613636	0.8503	0.823529
Fingerprint=LPFP4
DS+LPFP4_3	39	2	44	18	0.95122	0.709677	0.684211	0.956522	0.650736	0.8304	0.805825	21	1	10	2	0.954545	0.833333	0.913043	0.909091	0.804824	0.886	0.911765
DS+LPFP4_4	39	2	44	18	0.95122	0.709677	0.684211	0.956522	0.650736	0.8304	0.805825	21	1	10	2	0.954545	0.833333	0.913043	0.909091	0.804824	0.8844	0.911765
DS+LPFP4_5	39	2	44	18	0.95122	0.709677	0.684211	0.956522	0.650736	0.8304	0.805825	19	3	10	2	0.863636	0.833333	0.904762	0.769231	0.685385	0.8295	0.852941
DS+LPFP4_6	39	2	44	18	0.95122	0.709677	0.684211	0.956522	0.650736	0.8304	0.805825	19	3	10	2	0.863636	0.833333	0.904762	0.769231	0.685385	0.8295	0.852941
DS+LPFP4_7	39	2	44	18	0.95122	0.709677	0.684211	0.956522	0.650736	0.8304	0.805825	19	3	10	2	0.863636	0.833333	0.904762	0.769231	0.685385	0.856	0.852941
DS+LPFP4_8	39	2	44	18	0.95122	0.709677	0.684211	0.956522	0.650736	0.8304	0.805825	18	4	10	2	0.818182	0.833333	0.9	0.714286	0.632627	0.8522	0.823529
Fingerprint=LPFP6
DS+LPFP6_3	39	2	44	18	0.95122	0.709677	0.684211	0.956522	0.650736	0.8304	0.805825	21	1	10	2	0.954545	0.833333	0.913043	0.909091	0.804824	0.886	0.911765
DS+LPFP6_4	39	2	44	18	0.95122	0.709677	0.684211	0.956522	0.650736	0.8304	0.805825	21	1	10	2	0.954545	0.833333	0.913043	0.909091	0.804824	0.8844	0.911765
DS+LPFP6_5	39	2	44	18	0.95122	0.709677	0.684211	0.956522	0.650736	0.8304	0.805825	19	3	10	2	0.863636	0.833333	0.904762	0.769231	0.685385	0.8295	0.852941
DS+LPFP6_6	39	2	44	18	0.95122	0.709677	0.684211	0.956522	0.650736	0.8304	0.805825	19	3	10	2	0.863636	0.833333	0.904762	0.769231	0.685385	0.8295	0.852941
DS+LPFP6_7	39	2	44	18	0.95122	0.709677	0.684211	0.956522	0.650736	0.8304	0.805825	19	3	10	2	0.863636	0.833333	0.904762	0.769231	0.685385	0.856	0.852941
DS+LPFP6_8	39	2	44	18	0.95122	0.709677	0.684211	0.956522	0.650736	0.8304	0.805825	18	4	10	2	0.818182	0.833333	0.9	0.714286	0.632627	0.8522	0.823529
Fingerprint=LPFP8
DS+LPFP8_3	39	2	44	18	0.95122	0.709677	0.684211	0.956522	0.650736	0.8304	0.805825	21	1	10	2	0.954545	0.833333	0.913043	0.909091	0.804824	0.8836	0.911765
DS+LPFP8_4	39	2	44	18	0.95122	0.709677	0.684211	0.956522	0.650736	0.8304	0.805825	21	1	10	2	0.954545	0.833333	0.913043	0.909091	0.804824	0.8844	0.911765
DS+LPFP8_5	39	2	44	18	0.95122	0.709677	0.684211	0.956522	0.650736	0.8304	0.805825	19	3	10	2	0.863636	0.833333	0.904762	0.769231	0.685385	0.8295	0.852941
DS+LPFP8_6	39	2	44	18	0.95122	0.709677	0.684211	0.956522	0.650736	0.8304	0.805825	19	3	10	2	0.863636	0.833333	0.904762	0.769231	0.685385	0.8295	0.852941
DS+LPFP8_7	39	2	44	18	0.95122	0.709677	0.684211	0.956522	0.650736	0.8304	0.805825	19	3	10	2	0.863636	0.833333	0.904762	0.769231	0.685385	0.856	0.852941
DS+LPFP8_8	39	2	44	18	0.95122	0.709677	0.684211	0.956522	0.650736	0.8304	0.805825	18	4	10	2	0.818182	0.833333	0.9	0.714286	0.632627	0.8522	0.823529
Fingerprint=LPFP10
DS+LPFP10_3	39	2	44	18	0.95122	0.709677	0.684211	0.956522	0.650736	0.8304	0.805825	21	1	10	2	0.954545	0.833333	0.913043	0.909091	0.804824	0.886	0.911765
DS+LPFP10_4	39	2	44	18	0.95122	0.709677	0.684211	0.956522	0.650736	0.8304	0.805825	21	1	10	2	0.954545	0.833333	0.913043	0.909091	0.804824	0.8844	0.911765
DS+LPFP10_5	39	2	44	18	0.95122	0.709677	0.684211	0.956522	0.650736	0.8304	0.805825	19	3	10	2	0.863636	0.833333	0.904762	0.769231	0.685385	0.8295	0.852941
DS+LPFP10_6	39	2	44	18	0.95122	0.709677	0.684211	0.956522	0.650736	0.8304	0.805825	19	3	10	2	0.863636	0.833333	0.904762	0.769231	0.685385	0.8295	0.852941
DS+LPFP10_7	39	2	44	18	0.95122	0.709677	0.684211	0.956522	0.650736	0.8304	0.805825	19	3	10	2	0.863636	0.833333	0.904762	0.769231	0.685385	0.856	0.852941
DS+LPFP10_8	39	2	44	18	0.95122	0.709677	0.684211	0.956522	0.650736	0.8304	0.805825	18	4	10	2	0.818182	0.833333	0.9	0.714286	0.632627	0.8522	0.823529
Fingerprint=LPFP12
DS+LPFP12_3	39	2	44	18	0.95122	0.709677	0.684211	0.956522	0.650736	0.8304	0.805825	21	1	10	2	0.954545	0.833333	0.913043	0.909091	0.804824	0.886	0.911765
DS+LPFP12_4	39	2	44	18	0.95122	0.709677	0.684211	0.956522	0.650736	0.8304	0.805825	21	1	10	2	0.954545	0.833333	0.913043	0.909091	0.804824	0.8844	0.911765
DS+LPFP12_5	39	2	44	18	0.95122	0.709677	0.684211	0.956522	0.650736	0.8304	0.805825	19	3	10	2	0.863636	0.833333	0.904762	0.769231	0.685385	0.8295	0.852941
DS+LPFP12_6	39	2	44	18	0.95122	0.709677	0.684211	0.956522	0.650736	0.8304	0.805825	19	3	10	2	0.863636	0.833333	0.904762	0.769231	0.685385	0.8295	0.852941
DS+LPFP12_7	39	2	44	18	0.95122	0.709677	0.684211	0.956522	0.650736	0.8304	0.805825	19	3	10	2	0.863636	0.833333	0.904762	0.769231	0.685385	0.856	0.852941
DS+LPFP12_8	39	2	44	18	0.95122	0.709677	0.684211	0.956522	0.650736	0.8304	0.805825	18	4	10	2	0.818182	0.833333	0.9	0.714286	0.632627	0.8522	0.823529
MP+FP	Training set											Test set
Descriptors	TP	FN	TN	FP	SE	SP	Q+	Q-	C	AUC	Q	TP	FN	TN	FP	SE	SP	Q+	Q-	C	AUC	Q
Fingerprint=ECFP4
MP+ECFP4_3	28	13	56	6	0.682927	0.903226	0.823529	0.811594	0.610147	0.7931	0.815534	22	0	8	4	1	0.666667	0.846154	1	0.751068	0.91667	0.882353
MP+ECFP4_4	28	13	56	6	0.682927	0.903226	0.823529	0.811594	0.610147	0.7931	0.815534	22	0	1	0	2	1	1	1	1	0.8	0.90909
MP+ECFP4_5	28	13	56	6	0.682927	0.903226	0.823529	0.811594	0.610147	0.7931	0.815534	19	3	9	3	0.863636	0.75	0.863636	0.75	0.613636	0.8996	0.823529
MP+ECFP4_6	28	13	56	6	0.682927	0.903226	0.823529	0.811594	0.610147	0.7931	0.815534	19	3	9	3	0.863636	0.75	0.863636	0.75	0.613636	0.8996	0.823529
MP+ECFP4_7	28	13	56	6	0.682927	0.903226	0.823529	0.811594	0.610147	0.7931	0.815534	19	3	10	2	0.863636	0.833333	0.904762	0.769231	0.685385	0.9073	0.852941
MP+ECFP4_8	28	13	56	6	0.682927	0.903226	0.823529	0.811594	0.610147	0.7931	0.815534	19	3	10	2	0.863636	0.833333	0.904762	0.769231	0.685385	0.9073	0.852941
Fingerprint=ECFP6
MP+ECFP6_3	38	3	59	3	0.926829	0.951613	0.926829	0.951613	0.878442	0.95	0.941748	22	0	8	4	1	0.666667	0.846154	1	0.751068	0.91667	0.882353
MP+ECFP6_4	28	13	56	6	0.682927	0.903226	0.823529	0.811594	0.610147	0.7931	0.815534	20	2	10	2	0.909091	0.833333	0.909091	0.833333	0.742424	0.909	0.882353
MP+ECFP6_5	28	13	56	6	0.682927	0.903226	0.823529	0.811594	0.610147	0.7931	0.815534	19	3	9	3	0.863636	0.75	0.863636	0.75	0.613636	0.8996	0.823529
MP+ECFP6_6	28	13	56	6	0.682927	0.903226	0.823529	0.811594	0.610147	0.7931	0.815534	19	3	9	3	0.863636	0.75	0.863636	0.75	0.613636	0.8996	0.823529
MP+ECFP6_7	28	13	56	6	0.682927	0.903226	0.823529	0.811594	0.610147	0.7931	0.815534	19	3	10	2	0.863636	0.833333	0.904762	0.769231	0.685385	0.9072	0.852941
MP+ECFP6_8	28	13	56	6	0.682927	0.903226	0.823529	0.811594	0.610147	0.7931	0.815534	19	3	10	2	0.863636	0.833333	0.904762	0.769231	0.685385	0.9072	0.852941
Fingerprint=ECFP8
MP+ECFP8_3	28	13	56	6	0.682927	0.903226	0.823529	0.811594	0.610147	0.7931	0.815534	22	0	8	4	1	0.666667	0.846154	1	0.751068	0.91667	0.882353
MP+ECFP8_4	28	13	56	6	0.682927	0.903226	0.823529	0.811594	0.610147	0.7931	0.815534	22	0	10	2	1	0.833333	0.916667	1	0.874007	0.909	0.941176
MP+ECFP8_5	28	13	56	6	0.682927	0.903226	0.823529	0.811594	0.610147	0.7931	0.815534	19	3	9	3	0.863636	0.75	0.863636	0.75	0.613636	0.8996	0.823529
MP+ECFP8_6	28	13	56	6	0.682927	0.903226	0.823529	0.811594	0.610147	0.7931	0.815534	19	3	9	3	0.863636	0.75	0.863636	0.75	0.613636	0.8996	0.823529
MP+ECFP8_7	28	13	56	6	0.682927	0.903226	0.823529	0.811594	0.610147	0.7931	0.815534	19	3	10	2	0.863636	0.833333	0.904762	0.769231	0.685385	0.9072	0.852941
MP+ECFP8_8	28	13	56	6	0.682927	0.903226	0.823529	0.811594	0.610147	0.7931	0.815534	19	3	10	2	0.863636	0.833333	0.904762	0.769231	0.685385	0.9072	0.852941
Fingerprint=ECFP10
MP+ECFP10_3	28	13	56	6	0.682927	0.903226	0.823529	0.811594	0.610147	0.7931	0.815534	22	0	8	4	1	0.666667	0.846154	1	0.751068	0.91667	0.882353
MP+ECFP10_4	28	13	56	6	0.682927	0.903226	0.823529	0.811594	0.610147	0.7931	0.815534	22	0	10	2	1	0.833333	0.916667	1	0.874007	0.909	0.941176
MP+ECFP10_5	28	13	56	6	0.682927	0.903226	0.823529	0.811594	0.610147	0.7931	0.815534	19	3	9	3	0.863636	0.75	0.863636	0.75	0.613636	0.8996	0.823529
MP+ECFP10_6	28	13	56	6	0.682927	0.903226	0.823529	0.811594	0.610147	0.7931	0.815534	19	3	9	3	0.863636	0.75	0.863636	0.75	0.613636	0.8996	0.823529
MP+ECFP10_7	28	13	56	6	0.682927	0.903226	0.823529	0.811594	0.610147	0.7931	0.815534	19	3	10	2	0.863636	0.833333	0.904762	0.769231	0.685385	0.9072	0.852941
MP+ECFP10_8	28	13	56	6	0.682927	0.903226	0.823529	0.811594	0.610147	0.7931	0.815534	19	3	10	2	0.863636	0.833333	0.904762	0.769231	0.685385	0.9072	0.852941
Fingerprint=ECFP12
MP+ECFP12_3	28	13	56	6	0.682927	0.903226	0.823529	0.811594	0.610147	0.7931	0.815534	22	0	8	4	1	0.666667	0.846154	1	0.751068	0.91667	0.882353
MP+ECFP12_4	28	13	56	6	0.682927	0.903226	0.823529	0.811594	0.610147	0.7931	0.815534	22	0	10	2	1	0.833333	0.916667	1	0.874007	0.9093	0.941176
MP+ECFP12_5	28	13	56	6	0.682927	0.903226	0.823529	0.811594	0.610147	0.7931	0.815534	19	3	9	3	0.863636	0.75	0.863636	0.75	0.613636	0.8996	0.823529
MP+ECFP12_6	28	13	56	6	0.682927	0.903226	0.823529	0.811594	0.610147	0.7931	0.815534	19	3	9	3	0.863636	0.75	0.863636	0.75	0.613636	0.8996	0.823529
MP+ECFP12_7	28	13	56	6	0.682927	0.903226	0.823529	0.811594	0.610147	0.7931	0.815534	19	3	10	2	0.863636	0.833333	0.904762	0.769231	0.685385	0.9072	0.852941
MP+ECFP12_8	28	13	56	6	0.682927	0.903226	0.823529	0.811594	0.610147	0.7931	0.815534	19	3	10	2	0.863636	0.833333	0.904762	0.769231	0.685385	0.9072	0.852941
Fingerprint=EPFP4
MP+EPFP4_3	28	13	56	6	0.682927	0.903226	0.823529	0.811594	0.610147	0.7931	0.815534	20	2	10	2	0.909091	0.833333	0.909091	0.833333	0.742424	0.8674	0.882353
MP+EPFP4_4	28	13	56	6	0.682927	0.903226	0.823529	0.811594	0.610147	0.7931	0.815534	20	2	9	3	0.909091	0.75	0.869565	0.818182	0.673267	0.9375	0.852941
MP+EPFP4_5	28	13	56	6	0.682927	0.903226	0.823529	0.811594	0.610147	0.7931	0.815534	19	3	10	2	0.863636	0.833333	0.904762	0.769231	0.685385	0.8617	0.852941
MP+EPFP4_6	34	7	52	10	0.829268	0.83871	0.772727	0.881356	0.660994	0.8489	0.834951	20	2	9	3	0.909091	0.75	0.875	0.818182	0.673267	0.875	0.852941
MP+EPFP4_7	34	7	52	10	0.829268	0.83871	0.772727	0.881356	0.660994	0.8489	0.834951	20	2	9	3	0.909091	0.75	0.875	0.818182	0.673267	0.875	0.852941
MP+EPFP4_8	34	7	52	10	0.829268	0.83871	0.772727	0.881356	0.660994	0.8489	0.834951	20	2	9	3	0.909091	0.75	0.875	0.818182	0.673267	0.875	0.852941
Fingerprint=EPFP6
MP+EPFP6_3	41	0	37	25	1	0.596774	0.621212	1	0.608871	0.798	0.757282	22	0	10	2	1	0.833333	0.916667	1	0.874007	0.9886	0.941176
MP+EPFP6_4	41	0	37	25	1	0.596774	0.621212	1	0.608871	0.798	0.757282	20	2	12	0	0.909091	1	1	0.857143	0.882735	0.996	0.941176
MP+EPFP6_5	41	0	37	25	1	0.596774	0.621212	1	0.608871	0.798	0.757282	20	2	12	0	0.909091	1	1	0.857143	0.882735	0.996	0.941176
MP+EPFP6_6	41	0	37	25	1	0.596774	0.621212	1	0.608871	0.798	0.757282	20	2	12	0	0.909091	1	1	0.857143	0.882735	0.951	0.941176
MP+EPFP6_7	41	0	37	25	1	0.596774	0.621212	1	0.608871	0.798	0.757282	18	4	12	0	0.818182	1	1	0.75	0.783349	0.9469	0.882353
MP+EPFP6_8	41	0	37	25	1	0.596774	0.621212	1	0.608871	0.798	0.757282	18	4	12	0	0.818182	1	1	0.75	0.783349	0.9469	0.882353
Fingerprint=EPFP8
MP+EPFP8_3	41	0	37	25	1	0.596774	0.621212	1	0.608871	0.798	0.757282	22	0	10	2	1	0.833333	0.916667	1	0.874007	0.9886	0.941176
MP+EPFP8_4	41	0	37	25	1	0.596774	0.621212	1	0.608871	0.798	0.757282	20	2	12	0	0.909091	1	1	0.857143	0.882735	0.9962	0.941176
MP+EPFP8_5	41	0	37	25	1	0.596774	0.621212	1	0.608871	0.798	0.757282	20	2	12	0	0.909091	1	1	0.857143	0.882735	0.9962	0.941176
MP+EPFP8_6	41	0	37	25	1	0.596774	0.621212	1	0.608871	0.798	0.757282	20	2	12	0	0.909091	1	1	0.857143	0.882735	0.75	0.941176
MP+EPFP8_7	41	0	37	25	1	0.596774	0.621212	1	0.608871	0.798	0.757282	18	4	12	0	0.818182	1	1	0.75	0.783349	0.9469	0.882353
MP+EPFP8_8	41	0	37	25	1	0.596774	0.621212	1	0.608871	0.798	0.757282	18	4	12	0	0.818182	1	1	0.75	0.783349	0.9469	0.882353
Fingerprint=EPFP10
MP+EPFP10_3	41	0	37	25	1	0.596774	0.621212	1	0.608871	0.798	0.757282	22	0	10	2	1	0.833333	0.916667	1	0.874007	0.9886	0.941176
MP+EPFP10_4	41	0	37	25	1	0.596774	0.621212	1	0.608871	0.798	0.757282	20	2	12	0	0.909091	1	1	0.857143	0.882735	0.9962	0.941176
MP+EPFP10_5	41	0	37	25	1	0.596774	0.621212	1	0.608871	0.798	0.757282	20	2	12	0	0.909091	1	1	0.857143	0.882735	0.9962	0.941176
MP+EPFP10_6	41	0	37	25	1	0.596774	0.621212	1	0.608871	0.798	0.757282	20	2	12	0	0.909091	1	1	0.857143	0.882735	0.75	0.941176
MP+EPFP10_7	41	0	37	25	1	0.596774	0.621212	1	0.608871	0.798	0.757282	18	4	12	0	0.818182	1	1	0.75	0.783349	0.9469	0.882353
MP+EPFP10_8	41	0	37	25	1	0.596774	0.621212	1	0.608871	0.798	0.757282	18	4	12	0	0.818182	1	1	0.75	0.783349	0.9469	0.882353
Fingerprint=FCFP4
MP+FCFP4_3	28	13	56	6	0.682927	0.903226	0.823529	0.811594	0.610147	0.7931	0.815534	21	1	9	3	0.954545	0.75	0.875	0.9	0.738934	0.9848	0.882353
MP+FCFP4_4	28	13	56	6	0.682927	0.903226	0.823529	0.811594	0.610147	0.7931	0.815534	21	1	10	2	0.954545	0.833333	0.913043	0.909091	0.804824	0.9715	0.911765
MP+FCFP4_5	28	13	56	6	0.682927	0.903226	0.823529	0.811594	0.610147	0.7931	0.815534	20	2	9	3	0.909091	0.75	0.869565	0.818182	0.673267	0.9318	0.852941
MP+FCFP4_6	28	13	56	6	0.682927	0.903226	0.823529	0.811594	0.610147	0.7931	0.815534	20	2	9	3	0.909091	0.75	0.869565	0.818182	0.673267	0.9318	0.852941
MP+FCFP4_7	28	13	56	6	0.682927	0.903226	0.823529	0.811594	0.610147	0.7931	0.815534	20	2	9	3	0.909091	0.75	0.869565	0.818182	0.673267	0.9318	0.852941
MP+FCFP4_8	28	13	56	6	0.682927	0.903226	0.823529	0.811594	0.610147	0.7931	0.815534	20	2	8	4	0.909091	0.666667	0.833333	0.8	0.60386	0.924	0.823529
Fingerprint=FCFP6
MP+FCFP6_3	28	13	56	6	0.682927	0.903226	0.823529	0.811594	0.610147	0.7931	0.815534	21	1	9	3	0.954545	0.75	0.875	0.9	0.738934	0.9848	0.882353
MP+FCFP6_4	28	13	56	6	0.682927	0.903226	0.823529	0.811594	0.610147	0.7931	0.815534	21	1	10	2	0.954545	0.833333	0.913043	0.909091	0.804824	0.9715	0.911765
MP+FCFP6_5	28	13	56	6	0.682927	0.903226	0.823529	0.811594	0.610147	0.7931	0.815534	20	2	9	3	0.909091	0.75	0.869565	0.818182	0.673267	0.9318	0.852941
MP+FCFP6_6	28	13	56	6	0.682927	0.903226	0.823529	0.811594	0.610147	0.7931	0.815534	20	2	9	3	0.909091	0.75	0.869565	0.818182	0.673267	0.9318	0.852941
MP+FCFP6_7	28	13	56	6	0.682927	0.903226	0.823529	0.811594	0.610147	0.7931	0.815534	20	2	9	3	0.909091	0.75	0.869565	0.818182	0.673267	0.9318	0.852941
MP+FCFP6_8	28	13	56	6	0.682927	0.903226	0.823529	0.811594	0.610147	0.7931	0.815534	20	2	8	4	0.909091	0.666667	0.833333	0.8	0.60386	0.924	0.823529
Fingerprint=FCFP8
MP+FCFP8_3	28	13	56	6	0.682927	0.903226	0.823529	0.811594	0.610147	0.7931	0.815534	21	1	9	3	0.954545	0.75	0.875	0.9	0.738934	0.9848	0.882353
MP+FCFP8_4	28	13	56	6	0.682927	0.903226	0.823529	0.811594	0.610147	0.7931	0.815534	21	1	10	2	0.954545	0.833333	0.913043	0.909091	0.804824	0.9715	0.911765
MP+FCFP8_5	28	13	56	6	0.682927	0.903226	0.823529	0.811594	0.610147	0.7931	0.815534	20	2	9	3	0.909091	0.75	0.869565	0.818182	0.673267	0.9318	0.852941
MP+FCFP8_6	28	13	56	6	0.682927	0.903226	0.823529	0.811594	0.610147	0.7931	0.815534	20	2	9	3	0.909091	0.75	0.869565	0.818182	0.673267	0.9318	0.852941
MP+FCFP8_7	28	13	56	6	0.682927	0.903226	0.823529	0.811594	0.610147	0.7931	0.815534	20	2	9	3	0.909091	0.75	0.869565	0.818182	0.673267	0.9318	0.852941
MP+FCFP8_8	28	13	56	6	0.682927	0.903226	0.823529	0.811594	0.610147	0.7931	0.815534	20	2	8	4	0.909091	0.666667	0.833333	0.8	0.60386	0.924	0.823529
Fingerprint=FCFP10
MP+FCFP10_3	28	13	56	6	0.682927	0.903226	0.823529	0.811594	0.610147	0.7931	0.815534	21	1	9	3	0.954545	0.75	0.875	0.9	0.738934	0.9848	0.882353
MP+FCFP10_4	28	13	56	6	0.682927	0.903226	0.823529	0.811594	0.610147	0.7931	0.815534	21	1	10	2	0.954545	0.833333	0.913043	0.909091	0.804824	0.9715	0.911765
MP+FCFP10_5	28	13	56	6	0.682927	0.903226	0.823529	0.811594	0.610147	0.7931	0.815534	20	2	9	3	0.909091	0.75	0.869565	0.818182	0.673267	0.9318	0.852941
MP+FCFP10_6	28	13	56	6	0.682927	0.903226	0.823529	0.811594	0.610147	0.7931	0.815534	20	2	9	3	0.909091	0.75	0.869565	0.818182	0.673267	0.9318	0.852941
MP+FCFP10_7	28	13	56	6	0.682927	0.903226	0.823529	0.811594	0.610147	0.7931	0.815534	20	2	9	3	0.909091	0.75	0.869565	0.818182	0.673267	0.9318	0.852941
MP+FCFP10_8	28	13	56	6	0.682927	0.903226	0.823529	0.811594	0.610147	0.7931	0.815534	20	2	8	4	0.909091	0.666667	0.833333	0.8	0.60386	0.924	0.823529
Fingerprint=FCFP12
MP+FCFP12_3	38	3	54	8	0.926829	0.870968	0.826087	0.947368	0.785532	0.8989	0.893204	21	1	9	3	0.954545	0.75	0.875	0.9	0.738934	0.8371	0.882353
MP+FCFP12_4	38	3	54	8	0.926829	0.870968	0.826087	0.947368	0.785532	0.8989	0.893204	19	3	10	2	0.863636	0.833333	0.904762	0.769231	0.685385	0.8929	0.852941
MP+FCFP12_5	38	3	54	8	0.926829	0.870968	0.826087	0.947368	0.785532	0.8989	0.893204	22	0	8	4	1	0.666667	0.846154	1	0.751068	0.8257	0.882353
MP+FCFP12_6	36	5	61	1	0.878049	0.983871	0.972973	0.924242	0.879391	0.9481	0.941748	22	0	8	4	1	0.666667	0.846154	1	0.751068	0.8257	0.882353
MP+FCFP12_7	36	5	61	1	0.878049	0.983871	0.972973	0.924242	0.879391	0.9481	0.941748	22	0	8	4	1	0.666667	0.846154	1	0.751068	0.8257	0.882353
MP+FCFP12_8	36	5	61	1	0.878049	0.983871	0.972973	0.924242	0.879391	0.9481	0.941748	22	0	8	4	1	0.666667	0.846154	1	0.751068	0.8257	0.882353
Fingerprint=FPFP4
MP+FPFP4_3	28	13	56	6	0.682927	0.903226	0.823529	0.811594	0.610147	0.7931	0.815534	22	0	9	3	1	0.75	0.88	1	0.812404	0.8939	0.911765
MP+FPFP4_4	28	13	56	6	0.682927	0.903226	0.823529	0.811594	0.610147	0.7931	0.815534	22	0	12	0	1	1	1	1	1	1	1
MP+FPFP4_5	28	13	56	6	0.682927	0.903226	0.823529	0.811594	0.610147	0.7931	0.815534	21	1	9	3	0.954545	0.75	0.875	0.9	0.738934	0.9469	0.882353
MP+FPFP4_6	28	13	56	6	0.682927	0.903226	0.823529	0.811594	0.610147	0.7931	0.815534	21	1	9	3	0.954545	0.75	0.875	0.9	0.738934	0.9469	0.882353
MP+FPFP4_7	28	13	56	6	0.682927	0.903226	0.823529	0.811594	0.610147	0.7931	0.815534	21	1	8	4	0.954545	0.666667	0.84	0.888889	0.6729	0.9204	0.852941
MP+FPFP4_8	28	13	56	6	0.682927	0.903226	0.823529	0.811594	0.610147	0.7931	0.815534	18	4	10	2	0.818182	0.833333	0.9	0.714286	0.632627	0.9185	0.823529
Fingerprint=FPFP6
MP+FPFP6_3	28	13	56	6	0.682927	0.903226	0.823529	0.811594	0.610147	0.7931	0.815534	21	1	9	3	0.954545	0.75	0.875	0.9	0.738934	0.8844	0.882353
MP+FPFP6_4	28	13	56	6	0.682927	0.903226	0.823529	0.811594	0.610147	0.7931	0.815534	20	2	10	2	0.909091	0.833333	0.909091	0.833333	0.742424	0.9053	0.882353
MP+FPFP6_5	28	13	56	6	0.682927	0.903226	0.823529	0.811594	0.610147	0.7931	0.815534	21	1	9	3	0.954545	0.75	0.875	0.9	0.738934	0.8844	0.882353
MP+FPFP6_6	28	13	56	6	0.682927	0.903226	0.823529	0.811594	0.610147	0.7931	0.815534	21	1	9	3	0.954545	0.75	0.875	0.9	0.738934	0.9488	0.882353
MP+FPFP6_7	28	13	56	6	0.682927	0.903226	0.823529	0.811594	0.610147	0.7931	0.815534	21	1	9	3	0.954545	0.75	0.875	0.9	0.738934	0.949	0.882353
MP+FPFP6_8	28	13	56	6	0.682927	0.903226	0.823529	0.811594	0.610147	0.7931	0.815534	21	9	9	3	0.7	0.75	0.875	0.5	0.410792	0.949	0.714286
Fingerprint=FPFP8
MP+FPFP8_3	28	13	56	6	0.682927	0.903226	0.823529	0.811594	0.610147	0.7931	0.815534	21	1	9	3	0.954545	0.75	0.875	0.9	0.738934	0.8844	0.882353
MP+FPFP8_4	28	13	56	6	0.682927	0.903226	0.823529	0.811594	0.610147	0.7931	0.815534	19	3	12	0	0.863636	1	1	0.8	0.831209	0.994	0.911765
MP+FPFP8_5	28	13	56	6	0.682927	0.903226	0.823529	0.811594	0.610147	0.7931	0.815534	16	6	11	1	0.727273	0.916667	0.941176	0.647059	0.615457	0.9488	0.794118
MP+FPFP8_6	28	13	56	6	0.682927	0.903226	0.823529	0.811594	0.610147	0.7931	0.815534	19	3	11	1	0.863636	0.916667	0.95	0.785714	0.757681	0.928	0.882353
MP+FPFP8_7	28	13	56	6	0.682927	0.903226	0.823529	0.811594	0.610147	0.7931	0.815534	21	1	9	3	0.954545	0.75	0.875	0.9	0.738934	0.949	0.882353
MP+FPFP8_8	28	13	56	6	0.682927	0.903226	0.823529	0.811594	0.610147	0.7931	0.815534	21	9	9	3	0.7	0.75	0.875	0.5	0.410792	0.949	0.714286
Fingerprint=FPFP10
MP+FPFP10_3	28	13	56	6	0.682927	0.903226	0.823529	0.811594	0.610147	0.7931	0.815534	21	1	10	2	0.954545	0.833333	0.913043	0.909091	0.804824	0.9848	0.911765
MP+FPFP10_4	28	13	56	6	0.682927	0.903226	0.823529	0.811594	0.610147	0.7931	0.815534	19	3	12	0	0.863636	1	1	0.8	0.831209	0.994	0.911765
MP+FPFP10_5	28	13	56	6	0.682927	0.903226	0.823529	0.811594	0.610147	0.7931	0.815534	16	6	11	1	0.727273	0.916667	0.941176	0.647059	0.615457	0.9488	0.794118
MP+FPFP10_6	28	13	56	6	0.682927	0.903226	0.823529	0.811594	0.610147	0.7931	0.815534	19	3	11	1	0.863636	0.916667	0.95	0.785714	0.757681	0.928	0.882353
MP+FPFP10_7	28	13	56	6	0.682927	0.903226	0.823529	0.811594	0.610147	0.7931	0.815534	21	1	9	3	0.954545	0.75	0.875	0.9	0.738934	0.949	0.882353
MP+FPFP10_8	28	13	56	6	0.682927	0.903226	0.823529	0.811594	0.610147	0.7931	0.815534	21	9	9	3	0.7	0.75	0.875	0.5	0.410792	0.949	0.714286
Fingerprint=LCFP4
MP+LCFP4_3	36	5	58	4	0.878049	0.935484	0.9	0.920635	0.817076	0.9272	0.912621	18	4	9	3	0.818182	0.75	0.857143	0.692308	0.558738	0.8049	0.794118
MP+LCFP4_4	36	5	58	4	0.878049	0.935484	0.9	0.920635	0.817076	0.9272	0.912621	17	5	9	3	0.772727	0.75	0.85	0.642857	0.507573	0.7954	0.764706
MP+LCFP4_5	36	5	58	4	0.878049	0.935484	0.9	0.920635	0.817076	0.9272	0.912621	17	5	9	3	0.772727	0.75	0.85	0.642857	0.507573	0.8106	0.764706
MP+LCFP4_6	39	2	44	18	0.95122	0.709677	0.684211	0.956522	0.650736	0.8304	0.805825	17	5	9	3	0.772727	0.75	0.85	0.642857	0.507573	0.8219	0.764706
MP+LCFP4_7	39	2	44	18	0.95122	0.709677	0.684211	0.956522	0.650736	0.8304	0.805825	17	5	11	1	0.772727	0.916667	0.944444	0.6875	0.660044	0.9015	0.823529
MP+LCFP4_8	39	2	44	18	0.95122	0.709677	0.684211	0.956522	0.650736	0.8304	0.805825	18	4	9	3	0.818182	0.75	0.857143	0.692308	0.558738	0.8219	0.794118
Fingerprint=LCFP6
MP+LCFP6_3	36	5	58	4	0.878049	0.935484	0.9	0.920635	0.817076	0.9272	0.912621	18	4	9	3	0.818182	0.75	0.857143	0.692308	0.558738	0.8049	0.794118
MP+LCFP6_4	36	5	58	4	0.878049	0.935484	0.9	0.920635	0.817076	0.9272	0.912621	17	5	9	3	0.772727	0.75	0.85	0.642857	0.507573	0.7954	0.764706
MP+LCFP6_5	36	5	58	4	0.878049	0.935484	0.9	0.920635	0.817076	0.9272	0.912621	17	5	9	3	0.772727	0.75	0.85	0.642857	0.507573	0.8106	0.764706
MP+LCFP6_6	39	2	44	18	0.95122	0.709677	0.684211	0.956522	0.650736	0.8304	0.805825	17	5	9	3	0.772727	0.75	0.85	0.642857	0.507573	0.8219	0.764706
MP+LCFP6_7	39	2	44	18	0.95122	0.709677	0.684211	0.956522	0.650736	0.8304	0.805825	17	5	11	1	0.772727	0.916667	0.944444	0.6875	0.660044	0.9015	0.823529
MP+LCFP6_8	39	2	44	18	0.95122	0.709677	0.684211	0.956522	0.650736	0.8304	0.805825	18	4	9	3	0.818182	0.75	0.857143	0.692308	0.558738	0.8219	0.794118
Fingerprint=LCFP8
MP+LCFP8_3	36	5	58	4	0.878049	0.935484	0.9	0.920635	0.817076	0.9272	0.912621	18	4	9	3	0.818182	0.75	0.857143	0.692308	0.558738	0.8049	0.794118
MP+LCFP8_4	36	5	58	4	0.878049	0.935484	0.9	0.920635	0.817076	0.9272	0.912621	17	5	9	3	0.772727	0.75	0.85	0.642857	0.507573	0.7954	0.764706
MP+LCFP8_5	36	5	58	4	0.878049	0.935484	0.9	0.920635	0.817076	0.9272	0.912621	17	5	9	3	0.772727	0.75	0.85	0.642857	0.507573	0.8106	0.764706
MP+LCFP8_6	39	2	44	18	0.95122	0.709677	0.684211	0.956522	0.650736	0.8304	0.805825	17	5	9	3	0.772727	0.75	0.85	0.642857	0.507573	0.8219	0.764706
MP+LCFP8_7	39	2	44	18	0.95122	0.709677	0.684211	0.956522	0.650736	0.8304	0.805825	17	5	11	1	0.772727	0.916667	0.944444	0.6875	0.660044	0.9015	0.823529
MP+LCFP8_8	39	2	44	18	0.95122	0.709677	0.684211	0.956522	0.650736	0.8304	0.805825	18	4	9	3	0.818182	0.75	0.857143	0.692308	0.558738	0.8219	0.794118
Fingerprint=LCFP10
MP+LCFP10_3	36	5	58	4	0.878049	0.935484	0.9	0.920635	0.817076	0.9272	0.912621	18	4	9	3	0.818182	0.75	0.857143	0.692308	0.558738	0.8049	0.794118
MP+LCFP10_4	36	5	58	4	0.878049	0.935484	0.9	0.920635	0.817076	0.9272	0.912621	17	5	9	3	0.772727	0.75	0.85	0.642857	0.507573	0.7954	0.764706
MP+LCFP10_5	36	5	58	4	0.878049	0.935484	0.9	0.920635	0.817076	0.9272	0.912621	17	5	9	3	0.772727	0.75	0.85	0.642857	0.507573	0.8106	0.764706
MP+LCFP10_6	39	2	44	18	0.95122	0.709677	0.684211	0.956522	0.650736	0.8304	0.805825	17	5	9	3	0.772727	0.75	0.85	0.642857	0.507573	0.8219	0.764706
MP+LCFP10_7	39	2	44	18	0.95122	0.709677	0.684211	0.956522	0.650736	0.8304	0.805825	17	5	11	1	0.772727	0.916667	0.944444	0.6875	0.660044	0.9015	0.823529
MP+LCFP10_8	39	2	44	18	0.95122	0.709677	0.684211	0.956522	0.650736	0.8304	0.805825	18	4	9	3	0.818182	0.75	0.857143	0.692308	0.558738	0.8219	0.794118
Fingerprint=LPFP4
MP+LPFP4_3	36	5	58	4	0.878049	0.935484	0.9	0.920635	0.817076	0.9272	0.912621	19	3	6	6	0.863636	0.5	0.76	0.666667	0.393893	0.7784	0.735294
MP+LPFP4_4	36	5	58	4	0.878049	0.935484	0.9	0.920635	0.817076	0.9272	0.912621	17	5	9	3	0.772727	0.75	0.85	0.642857	0.507573	0.7954	0.764706
MP+LPFP4_5	39	2	44	18	0.95122	0.709677	0.684211	0.956522	0.650736	0.8304	0.805825	17	5	9	3	0.772727	0.75	0.85	0.642857	0.507573	0.8106	0.764706
MP+LPFP4_6	39	2	44	18	0.95122	0.709677	0.684211	0.956522	0.650736	0.8304	0.805825	17	5	9	3	0.772727	0.75	0.85	0.642857	0.507573	0.8106	0.764706
MP+LPFP4_7	39	2	44	18	0.95122	0.709677	0.684211	0.956522	0.650736	0.8304	0.805825	17	5	11	1	0.772727	0.916667	0.944444	0.6875	0.660044	0.9015	0.823529
MP+LPFP4_8	39	2	44	18	0.95122	0.709677	0.684211	0.956522	0.650736	0.8304	0.805825	18	4	9	3	0.818182	0.75	0.857143	0.692308	0.558738	0.8219	0.794118
Fingerprint=LPFP6
MP+LPFP6_3	39	2	56	6	0.95122	0.903226	0.866667	0.965517	0.843241	0.9437	0.92233	19	3	6	6	0.863636	0.5	0.76	0.666667	0.393893	0.7784	0.735294
MP+LPFP6_4	36	5	58	4	0.878049	0.935484	0.9	0.920635	0.817076	0.9272	0.912621	17	5	9	3	0.772727	0.75	0.85	0.642857	0.507573	0.7954	0.764706
MP+LPFP6_5	39	2	44	18	0.95122	0.709677	0.684211	0.956522	0.650736	0.8304	0.805825	17	5	9	3	0.772727	0.75	0.85	0.642857	0.507573	0.8106	0.764706
MP+LPFP6_6	39	2	44	18	0.95122	0.709677	0.684211	0.956522	0.650736	0.8304	0.805825	17	5	9	3	0.772727	0.75	0.85	0.642857	0.507573	0.8219	0.764706
MP+LPFP6_7	39	2	44	18	0.95122	0.709677	0.684211	0.956522	0.650736	0.8304	0.805825	17	5	11	1	0.772727	0.916667	0.944444	0.6875	0.660044	0.9015	0.823529
MP+LPFP6_8	39	2	44	18	0.95122	0.709677	0.684211	0.956522	0.650736	0.8304	0.805825	18	4	9	3	0.818182	0.75	0.857143	0.692308	0.558738	0.8219	0.794118
Fingerprint=LPFP8
MP+LPFP8_3	36	5	58	4	0.878049	0.935484	0.9	0.920635	0.817076	0.9437	0.912621	19	3	6	6	0.863636	0.5	0.76	0.666667	0.393893	0.7784	0.735294
MP+LPFP8_4	36	5	58	4	0.878049	0.935484	0.9	0.920635	0.817076	0.9272	0.912621	17	5	9	3	0.772727	0.75	0.85	0.642857	0.507573	0.7954	0.764706
MP+LPFP8_5	39	2	44	18	0.95122	0.709677	0.684211	0.956522	0.650736	0.8304	0.805825	17	5	9	3	0.772727	0.75	0.85	0.642857	0.507573	0.8106	0.764706
MP+LPFP8_6	39	2	44	18	0.95122	0.709677	0.684211	0.956522	0.650736	0.8304	0.805825	17	5	9	3	0.772727	0.75	0.85	0.642857	0.507573	0.8219	0.764706
MP+LPFP8_7	39	2	44	18	0.95122	0.709677	0.684211	0.956522	0.650736	0.8304	0.805825	17	5	11	1	0.772727	0.916667	0.944444	0.6875	0.660044	0.9015	0.823529
MP+LPFP8_8	39	2	44	18	0.95122	0.709677	0.684211	0.956522	0.650736	0.8304	0.805825	18	4	9	3	0.818182	0.75	0.857143	0.692308	0.558738	0.8219	0.794118
Fingerprint=LPFP10
MP+LPFP10_3	36	5	58	4	0.878049	0.935484	0.9	0.920635	0.817076	0.9437	0.912621	19	3	6	6	0.863636	0.5	0.76	0.666667	0.393893	0.7784	0.735294
MP+LPFP10_4	36	5	58	4	0.878049	0.935484	0.9	0.920635	0.817076	0.9272	0.912621	17	5	9	3	0.772727	0.75	0.85	0.642857	0.507573	0.7954	0.764706
MP+LPFP10_5	39	2	44	18	0.95122	0.709677	0.684211	0.956522	0.650736	0.8304	0.805825	17	5	9	3	0.772727	0.75	0.85	0.642857	0.507573	0.8106	0.764706
MP+LPFP10_6	39	2	44	18	0.95122	0.709677	0.684211	0.956522	0.650736	0.8304	0.805825	17	5	9	3	0.772727	0.75	0.85	0.642857	0.507573	0.8219	0.764706
MP+LPFP10_7	39	2	44	18	0.95122	0.709677	0.684211	0.956522	0.650736	0.8304	0.805825	17	5	11	1	0.772727	0.916667	0.944444	0.6875	0.660044	0.9015	0.823529
MP+LPFP10_8	39	2	44	18	0.95122	0.709677	0.684211	0.956522	0.650736	0.8304	0.805825	18	4	9	3	0.818182	0.75	0.857143	0.692308	0.558738	0.8219	0.794118
Fingerprint=LPFP12
MP+LPFP12_3	36	5	58	4	0.878049	0.935484	0.9	0.920635	0.817076	0.9437	0.912621	19	3	6	6	0.863636	0.5	0.76	0.666667	0.393893	0.7784	0.735294
MP+LPFP12_4	36	5	58	4	0.878049	0.935484	0.9	0.920635	0.817076	0.9272	0.912621	17	5	9	3	0.772727	0.75	0.85	0.642857	0.507573	0.7954	0.764706
MP+LPFP12_5	39	2	44	18	0.95122	0.709677	0.684211	0.956522	0.650736	0.8304	0.805825	17	5	9	3	0.772727	0.75	0.85	0.642857	0.507573	0.8106	0.764706
MP+LPFP12_6	39	2	44	18	0.95122	0.709677	0.684211	0.956522	0.650736	0.8304	0.805825	17	5	9	3	0.772727	0.75	0.85	0.642857	0.507573	0.8219	0.764706
MP+LPFP12_7	39	2	44	18	0.95122	0.709677	0.684211	0.956522	0.650736	0.8304	0.805825	17	5	11	1	0.772727	0.916667	0.944444	0.6875	0.660044	0.9015	0.823529
MP+LPFP12_8	39	2	44	18	0.95122	0.709677	0.684211	0.956522	0.650736	0.8304	0.805825	18	4	9	3	0.818182	0.75	0.857143	0.692308	0.558738	0.8219	0.794118
